# Supplementary material
Source: publisher figshare collection journal article supplement (https://gsajournals.figshare.com/ndownloader/files/25497845)
Supplement: Supplementary file 1 [file 25497845]

## Sheet: Supplementary_Table_S1
Table S1: Landscape of allelic imbalance events across all 33 tumor types in TCGA
TCGA Study	Sample ID	Chromosome	Start	End	BAF deviation	LRR deviation	Event Type
ACC	TCGA-OR-A5J1-01A-11D-A29H-01	1	53987000	54370264	0.1765	0.2554	Inherited Duplication
ACC	TCGA-OR-A5J1-01A-11D-A29H-01	1	146498838	147213954	0.1707	0.3367	Inherited Duplication
ACC	TCGA-OR-A5J1-01A-11D-A29H-01	1	167015496	167455145	0.1584	0.2711	Inherited Duplication
ACC	TCGA-OR-A5J1-01A-11D-A29H-01	2	41715337	42994484	0.1836	0.4452	Inherited Duplication
ACC	TCGA-OR-A5J1-01A-11D-A29H-01	2	85809989	86841304	0.1769	0.3255	Inherited Duplication
ACC	TCGA-OR-A5J1-01A-11D-A29H-01	2	127537548	129017422	0.1441	0.2449	Inherited Duplication
ACC	TCGA-OR-A5J1-01A-11D-A29H-01	5	36344	49843075	0.3713	-0.388	Mosaic Loss
ACC	TCGA-OR-A5J1-01A-11D-A29H-01	5	49900023	75521810	0.1147	0.0892	Mosaic Gain
ACC	TCGA-OR-A5J1-01A-11D-A29H-01	5	77564571	90189111	0.1224	0.1509	Mosaic Gain
ACC	TCGA-OR-A5J1-01A-11D-A29H-01	6	118976282	119674904	0.1787	0.4155	Inherited Duplication
ACC	TCGA-OR-A5J1-01A-11D-A29H-01	7	105473397	106018427	0.1476	0.3466	Inherited Duplication
ACC	TCGA-OR-A5J1-01A-11D-A29H-01	8	11323025	11745820	0.1456	0.2923	Inherited Duplication
ACC	TCGA-OR-A5J1-01A-11D-A29H-01	8	51470932	52567937	0.1686	0.3917	Inherited Duplication
ACC	TCGA-OR-A5J1-01A-11D-A29H-01	9	36135424	36780684	0.2283	0.4158	Inherited Duplication
ACC	TCGA-OR-A5J1-01A-11D-A29H-01	11	117777599	119300681	0.1861	0.2421	Inherited Duplication
ACC	TCGA-OR-A5J1-01A-11D-A29H-01	12	69120641	70310546	0.1747	0.3636	Inherited Duplication
ACC	TCGA-OR-A5J1-01A-11D-A29H-01	12	109744235	110116259	0.1746	0.3329	Inherited Duplication
ACC	TCGA-OR-A5J1-01A-11D-A29H-01	12	113265248	113621510	0.1829	0.3612	Inherited Duplication
ACC	TCGA-OR-A5J1-01A-11D-A29H-01	12	132092790	132694312	0.1553	0.3706	Inherited Duplication
ACC	TCGA-OR-A5J1-01A-11D-A29H-01	13	21006871	22419414	0.166	0.4039	Inherited Duplication
ACC	TCGA-OR-A5J1-01A-11D-A29H-01	13	46504052	47706096	0.1689	0.4487	Inherited Duplication
ACC	TCGA-OR-A5J1-01A-11D-A29H-01	14	75416000	75908780	0.1746	0.3321	Inherited Duplication
ACC	TCGA-OR-A5J1-01A-11D-A29H-01	16	1414498	2499011	0.162	0.3044	Inherited Duplication
ACC	TCGA-OR-A5J1-01A-11D-A29H-01	16	15658648	16290377	0.1911	0.3786	Inherited Duplication
ACC	TCGA-OR-A5J1-01A-11D-A29H-01	16	87596630	88649755	0.299	0.5745	Inherited Duplication
ACC	TCGA-OR-A5J1-01A-11D-A29H-01	17	41658263	42138392	0.1735	0.3497	Inherited Duplication
ACC	TCGA-OR-A5J1-01A-11D-A29H-01	19	24373826	41869392	0.3155	-0.2276	Mosaic Loss
ACC	TCGA-OR-A5J1-01A-11D-A29H-01	19	43559330	58902190	0.3722	-0.4358	Mosaic Loss
ACC	TCGA-OR-A5J1-01A-11D-A29H-01	21	44060337	48084820	0.065	0.1227	Mosaic Gain
ACC	TCGA-OR-A5J1-01A-11D-A29H-01	22	16055171	22335298	0.0712	0.11	Mosaic Gain
ACC	TCGA-OR-A5J1-01A-11D-A29H-01	22	22917025	50957520	0.3801	-0.4376	Mosaic Loss
ACC	TCGA-OR-A5J2-01A-11D-A29H-01	1	3285150	247753334	0.4235	0.0806	Mosaic Gain
ACC	TCGA-OR-A5J2-01A-11D-A29H-01	1	248344919	249198692	0.4645	0.1971	Inherited Duplication
ACC	TCGA-OR-A5J2-01A-11D-A29H-01	2	15703	24661220	0.3824	-0.1423	Mosaic Loss
ACC	TCGA-OR-A5J2-01A-11D-A29H-01	2	25845467	243048760	0.3975	-0.0609	Mosaic Loss
ACC	TCGA-OR-A5J2-01A-11D-A29H-01	4	61981	190930894	0.3961	-0.0522	Mosaic Loss
ACC	TCGA-OR-A5J2-01A-11D-A29H-01	5	36344	63358509	0.3779	-0.1543	Mosaic Loss
ACC	TCGA-OR-A5J2-01A-11D-A29H-01	5	64012428	97797963	0.3977	-0.0721	Mosaic Loss
ACC	TCGA-OR-A5J2-01A-11D-A29H-01	5	98277122	180692833	0.3888	-0.0988	Mosaic Loss
ACC	TCGA-OR-A5J2-01A-11D-A29H-01	6	165632	170905977	0.3954	-0.0651	Mosaic Loss
ACC	TCGA-OR-A5J2-01A-11D-A29H-01	7	2613424	5215853	0.184	0.0188	Mosaic cnLOH
ACC	TCGA-OR-A5J2-01A-11D-A29H-01	7	6174379	38534759	0.1838	0.0586	Mosaic Gain
ACC	TCGA-OR-A5J2-01A-11D-A29H-01	7	41272460	43256590	0.1878	0.027	Mosaic cnLOH
ACC	TCGA-OR-A5J2-01A-11D-A29H-01	7	43584899	47307108	0.0719	0.277	Mosaic Gain
ACC	TCGA-OR-A5J2-01A-11D-A29H-01	8	221671	146293414	0.3886	-0.1199	Mosaic Loss
ACC	TCGA-OR-A5J2-01A-11D-A29H-01	9	46587	23423892	0.3968	-0.0593	Mosaic Loss
ACC	TCGA-OR-A5J2-01A-11D-A29H-01	9	23567768	140760491	0.3937	-0.0667	Mosaic Loss
ACC	TCGA-OR-A5J2-01A-11D-A29H-01	11	709861	134942626	0.3935	-0.0712	Mosaic Loss
ACC	TCGA-OR-A5J2-01A-11D-A29H-01	13	27910086	114945972	0.0845	0.0961	Mosaic Gain
ACC	TCGA-OR-A5J2-01A-11D-A29H-01	13	115025398	115106996	0.1352	0.095	Inherited Duplication
ACC	TCGA-OR-A5J2-01A-11D-A29H-01	14	20211644	107285437	0.3945	-0.0572	Mosaic Loss
ACC	TCGA-OR-A5J2-01A-11D-A29H-01	15	20071673	102400037	0.393	-0.0775	Mosaic Loss
ACC	TCGA-OR-A5J2-01A-11D-A29H-01	16	86671	90163275	0.3895	-0.0882	Mosaic Loss
ACC	TCGA-OR-A5J2-01A-11D-A29H-01	17	6689	81048659	0.3905	-0.0784	Mosaic Loss
ACC	TCGA-OR-A5J2-01A-11D-A29H-01	18	100949	78014582	0.3935	-0.0715	Mosaic Loss
ACC	TCGA-OR-A5J2-01A-11D-A29H-01	19	260912	12374905	0.3953	-0.0845	Mosaic Loss
ACC	TCGA-OR-A5J2-01A-11D-A29H-01	19	15292088	59093464	0.4001	-0.0602	Mosaic Loss
ACC	TCGA-OR-A5J2-01A-11D-A29H-01	20	61795	26133311	0.3657	-0.2221	Mosaic Loss
ACC	TCGA-OR-A5J2-01A-11D-A29H-01	20	53458542	54475059	0.1352	0.0388	Mosaic cnLOH
ACC	TCGA-OR-A5J2-01A-11D-A29H-01	21	11039570	48084820	0.3901	-0.0811	Mosaic Loss
ACC	TCGA-OR-A5J2-01A-11D-A29H-01	22	16055171	49910286	0.3652	-0.1835	Mosaic Loss
ACC	TCGA-OR-A5J2-01A-11D-A29H-01	22	49997967	51219006	0.3751	-0.2023	Mosaic Loss
ACC	TCGA-OR-A5J3-01A-11D-A29H-01	1	2327075	145394955	0.4217	-0.0547	Mosaic Loss
ACC	TCGA-OR-A5J3-01A-11D-A29H-01	1	145587540	249198692	0.4174	-0.1211	Mosaic Loss
ACC	TCGA-OR-A5J3-01A-11D-A29H-01	2	15703	8728909	0.4205	-0.09	Mosaic Loss
ACC	TCGA-OR-A5J3-01A-11D-A29H-01	2	8982094	26731244	0.4209	-0.0859	Mosaic Loss
ACC	TCGA-OR-A5J3-01A-11D-A29H-01	2	26912079	220429246	0.4215	-0.0667	Mosaic Loss
ACC	TCGA-OR-A5J3-01A-11D-A29H-01	2	220554225	243048760	0.4217	-0.0803	Mosaic Loss
ACC	TCGA-OR-A5J3-01A-11D-A29H-01	3	69244	31901848	0.4231	-0.0603	Mosaic Loss
ACC	TCGA-OR-A5J3-01A-11D-A29H-01	3	31960866	32218812	0.4097	-0.0908	Mosaic Loss
ACC	TCGA-OR-A5J3-01A-11D-A29H-01	3	32235481	197808975	0.4214	-0.0607	Mosaic Loss
ACC	TCGA-OR-A5J3-01A-11D-A29H-01	4	61981	7992908	0.4136	-0.0921	Mosaic Loss
ACC	TCGA-OR-A5J3-01A-11D-A29H-01	4	8226488	190930894	0.4248	-0.0427	Mosaic cnLOH
ACC	TCGA-OR-A5J3-01A-11D-A29H-01	5	36344	454732	0.0478	0.2743	Inherited Duplication
ACC	TCGA-OR-A5J3-01A-11D-A29H-01	6	186221	170905977	0.4236	-0.0555	Mosaic Loss
ACC	TCGA-OR-A5J3-01A-11D-A29H-01	8	190568	146293414	0.4172	-0.1147	Mosaic Loss
ACC	TCGA-OR-A5J3-01A-11D-A29H-01	9	46587	141071475	0.4217	-0.0623	Mosaic Loss
ACC	TCGA-OR-A5J3-01A-11D-A29H-01	10	104427	11933289	0.4174	-0.0794	Mosaic Loss
ACC	TCGA-OR-A5J3-01A-11D-A29H-01	10	12809651	135434551	0.4201	-0.0636	Mosaic Loss
ACC	TCGA-OR-A5J3-01A-11D-A29H-01	11	211447	10806139	0.4175	-0.0786	Mosaic Loss
ACC	TCGA-OR-A5J3-01A-11D-A29H-01	11	10961778	62916577	0.4187	-0.0794	Mosaic Loss
ACC	TCGA-OR-A5J3-01A-11D-A29H-01	11	64178737	134942626	0.4179	-0.0809	Mosaic Loss
ACC	TCGA-OR-A5J3-01A-11D-A29H-01	13	19634077	30016362	0.419	-0.0578	Mosaic Loss
ACC	TCGA-OR-A5J3-01A-11D-A29H-01	13	30029130	115086044	0.422	-0.055	Mosaic Loss
ACC	TCGA-OR-A5J3-01A-11D-A29H-01	15	22799908	68114974	0.4209	-0.0691	Mosaic Loss
ACC	TCGA-OR-A5J3-01A-11D-A29H-01	15	68289056	102348632	0.4178	-0.0815	Mosaic Loss
ACC	TCGA-OR-A5J3-01A-11D-A29H-01	17	129225	81048659	0.4186	-0.0777	Mosaic Loss
ACC	TCGA-OR-A5J3-01A-11D-A29H-01	18	100949	10272979	0.4208	-0.0714	Mosaic Loss
ACC	TCGA-OR-A5J3-01A-11D-A29H-01	18	10282296	77998375	0.4199	-0.0695	Mosaic Loss
ACC	TCGA-OR-A5J3-01A-11D-A29H-01	20	108328	4795703	0.4097	-0.1142	Mosaic Loss
ACC	TCGA-OR-A5J3-01A-11D-A29H-01	20	5033341	62912463	0.415	-0.1217	Mosaic Loss
ACC	TCGA-OR-A5J3-01A-11D-A29H-01	22	17187719	51219006	0.4071	-0.1322	Mosaic Loss
ACC	TCGA-OR-A5J4-01A-11D-A29H-01	1	761732	12249031	0.298	-0.4831	Mosaic Loss
ACC	TCGA-OR-A5J4-01A-11D-A29H-01	1	22802072	23463468	0.3232	-0.5744	Mosaic Loss
ACC	TCGA-OR-A5J4-01A-11D-A29H-01	1	26014024	26865688	0.3435	-0.5679	Mosaic Loss
ACC	TCGA-OR-A5J4-01A-11D-A29H-01	1	75146093	149996325	0.1886	0.1568	Mosaic Gain
ACC	TCGA-OR-A5J4-01A-11D-A29H-01	1	195650518	196171426	0.3331	-0.6782	Mosaic Loss
ACC	TCGA-OR-A5J4-01A-11D-A29H-01	1	219962312	220546380	0.2509	0.3629	Inherited Duplication
ACC	TCGA-OR-A5J4-01A-11D-A29H-01	1	241242629	241403162	0.3096	-0.5847	Mosaic Loss
ACC	TCGA-OR-A5J4-01A-11D-A29H-01	1	244102322	249198692	0.2435	0.3166	Mosaic Gain
ACC	TCGA-OR-A5J4-01A-11D-A29H-01	2	54844422	55676153	0.1456	0.1048	Inherited Duplication
ACC	TCGA-OR-A5J4-01A-11D-A29H-01	2	83694607	140905471	0.1564	0.1702	Mosaic Gain
ACC	TCGA-OR-A5J4-01A-11D-A29H-01	2	141962826	196001319	0.1627	0.2089	Mosaic Gain
ACC	TCGA-OR-A5J4-01A-11D-A29H-01	2	197845449	200867028	0.1501	0.2228	Mosaic Gain
ACC	TCGA-OR-A5J4-01A-11D-A29H-01	2	230325123	243048760	0.3234	-0.6088	Mosaic Loss
ACC	TCGA-OR-A5J4-01A-11D-A29H-01	3	69244	64458932	0.4186	-0.1147	Mosaic Loss
ACC	TCGA-OR-A5J4-01A-11D-A29H-01	3	64744538	117239197	0.1654	0.2017	Mosaic Gain
ACC	TCGA-OR-A5J4-01A-11D-A29H-01	3	117849019	187909210	0.185	0.1316	Mosaic Gain
ACC	TCGA-OR-A5J4-01A-11D-A29H-01	3	188268573	197808975	0.1912	0.1381	Mosaic Gain
ACC	TCGA-OR-A5J4-01A-11D-A29H-01	4	61981	121349054	0.1595	0.1844	Mosaic Gain
ACC	TCGA-OR-A5J4-01A-11D-A29H-01	4	160508403	163391890	0.1504	0.2333	Mosaic Gain
ACC	TCGA-OR-A5J4-01A-11D-A29H-01	5	226453	23620741	0.1545	0.1217	Mosaic Gain
ACC	TCGA-OR-A5J4-01A-11D-A29H-01	5	26174484	180692833	0.1485	0.1354	Mosaic Gain
ACC	TCGA-OR-A5J4-01A-11D-A29H-01	6	165632	9690843	0.1696	0.1665	Mosaic Gain
ACC	TCGA-OR-A5J4-01A-11D-A29H-01	6	68598659	80683573	0.1942	0.3141	Mosaic Gain
ACC	TCGA-OR-A5J4-01A-11D-A29H-01	6	81034505	94330479	0.2918	0.6113	Mosaic Gain
ACC	TCGA-OR-A5J4-01A-11D-A29H-01	7	81400	159116965	0.3851	-0.3221	Mosaic Loss
ACC	TCGA-OR-A5J4-01A-11D-A29H-01	8	113565	218518	0.0561	-0.1683	Mosaic Loss
ACC	TCGA-OR-A5J4-01A-11D-A29H-01	8	7011075	11684403	0.1534	0.148	Mosaic Gain
ACC	TCGA-OR-A5J4-01A-11D-A29H-01	8	11843758	20709001	0.1545	0.205	Mosaic Gain
ACC	TCGA-OR-A5J4-01A-11D-A29H-01	8	70612221	76565553	0.0999	0.5345	Mosaic Gain
ACC	TCGA-OR-A5J4-01A-11D-A29H-01	8	78814835	81086919	0.1103	0.5895	Mosaic Gain
ACC	TCGA-OR-A5J4-01A-11D-A29H-01	8	96115476	116359584	0.1669	0.1127	Mosaic Gain
ACC	TCGA-OR-A5J4-01A-11D-A29H-01	8	142302024	143219485	0.1397	-0.0221	Mosaic cnLOH
ACC	TCGA-OR-A5J4-01A-11D-A29H-01	8	144666895	146293414	0.1557	-0.0023	Mosaic cnLOH
ACC	TCGA-OR-A5J4-01A-11D-A29H-01	9	46587	7731398	0.1482	0.1455	Mosaic Gain
ACC	TCGA-OR-A5J4-01A-11D-A29H-01	9	71035703	96753722	0.16	0.2436	Mosaic Gain
ACC	TCGA-OR-A5J4-01A-11D-A29H-01	9	108755580	111339821	0.1026	0.5725	Mosaic Gain
ACC	TCGA-OR-A5J4-01A-11D-A29H-01	9	112466777	122288254	0.1071	0.5736	Mosaic Gain
ACC	TCGA-OR-A5J4-01A-11D-A29H-01	9	126328327	126685898	0.1646	0.265	Inherited Duplication
ACC	TCGA-OR-A5J4-01A-11D-A29H-01	9	135935185	137158844	0.1408	0.4839	Inherited Duplication
ACC	TCGA-OR-A5J4-01A-11D-A29H-01	9	139320929	141071475	0.1021	0.4666	Inherited Duplication
ACC	TCGA-OR-A5J4-01A-11D-A29H-01	10	104427	29573917	0.3252	-0.5907	Mosaic Loss
ACC	TCGA-OR-A5J4-01A-11D-A29H-01	10	38502361	135434551	0.371	-0.0312	Mosaic cnLOH
ACC	TCGA-OR-A5J4-01A-11D-A29H-01	11	211447	12017555	0.3386	-0.5308	Mosaic Loss
ACC	TCGA-OR-A5J4-01A-11D-A29H-01	11	19983180	23096397	0.1542	0.1814	Mosaic Gain
ACC	TCGA-OR-A5J4-01A-11D-A29H-01	11	23535583	34666850	0.1643	0.2049	Mosaic Gain
ACC	TCGA-OR-A5J4-01A-11D-A29H-01	11	40659991	41578417	0.1608	0.2454	Inherited Duplication
ACC	TCGA-OR-A5J4-01A-11D-A29H-01	11	61604814	65451020	0.2029	0.4237	Mosaic Gain
ACC	TCGA-OR-A5J4-01A-11D-A29H-01	12	12902011	32745424	0.1561	0.1684	Mosaic Gain
ACC	TCGA-OR-A5J4-01A-11D-A29H-01	12	54102784	100124102	0.255	0.4383	Mosaic Gain
ACC	TCGA-OR-A5J4-01A-11D-A29H-01	12	125234313	133777645	0.3819	-0.3507	Mosaic Loss
ACC	TCGA-OR-A5J4-01A-11D-A29H-01	13	19045628	115106996	0.4229	-0.0987	Mosaic Loss
ACC	TCGA-OR-A5J4-01A-11D-A29H-01	14	20211644	45237206	0.1676	0.2276	Mosaic Gain
ACC	TCGA-OR-A5J4-01A-11D-A29H-01	14	54010575	107285437	0.1553	0.1696	Mosaic Gain
ACC	TCGA-OR-A5J4-01A-11D-A29H-01	15	20071673	102400037	0.4208	-0.1331	Mosaic Loss
ACC	TCGA-OR-A5J4-01A-11D-A29H-01	16	86671	85319399	0.438	-0.027	Mosaic cnLOH
ACC	TCGA-OR-A5J4-01A-11D-A29H-01	16	85707367	90163275	0.4197	-0.1766	Mosaic Loss
ACC	TCGA-OR-A5J4-01A-11D-A29H-01	17	961900	81048659	0.4254	-0.0943	Mosaic Loss
ACC	TCGA-OR-A5J4-01A-11D-A29H-01	19	1192769	5725992	0.2286	0.2902	Mosaic Gain
ACC	TCGA-OR-A5J4-01A-11D-A29H-01	19	18206073	59093464	0.2342	0.3166	Mosaic Gain
ACC	TCGA-OR-A5J4-01A-11D-A29H-01	20	61795	24401863	0.167	0.1162	Mosaic Gain
ACC	TCGA-OR-A5J4-01A-11D-A29H-01	20	36224534	38013990	0.1548	0.1126	Inherited Duplication
ACC	TCGA-OR-A5J4-01A-11D-A29H-01	20	39029027	39271481	0.1081	0.6485	Inherited Duplication
ACC	TCGA-OR-A5J4-01A-11D-A29H-01	20	48758191	51425077	0.1478	0.127	Mosaic Gain
ACC	TCGA-OR-A5J4-01A-11D-A29H-01	20	57372192	59006862	0.0909	0.2117	Inherited Duplication
ACC	TCGA-OR-A5J4-01A-11D-A29H-01	21	47608580	48084747	0.1437	-0.3714	Mosaic Loss
ACC	TCGA-OR-A5J4-01A-11D-A29H-01	22	35131593	43716324	0.1426	0.1009	Mosaic Gain
ACC	TCGA-OR-A5J5-01A-11D-A29H-01	1	949608	249198692	0.4148	-0.2194	Mosaic Loss
ACC	TCGA-OR-A5J5-01A-11D-A29H-01	2	15703	32539236	0.4085	-0.2184	Mosaic Loss
ACC	TCGA-OR-A5J5-01A-11D-A29H-01	2	33316476	243048760	0.4178	-0.2008	Mosaic Loss
ACC	TCGA-OR-A5J5-01A-11D-A29H-01	3	69244	38969306	0.417	-0.1979	Mosaic Loss
ACC	TCGA-OR-A5J5-01A-11D-A29H-01	3	39175004	61472886	0.4181	-0.2112	Mosaic Loss
ACC	TCGA-OR-A5J5-01A-11D-A29H-01	3	61498833	175548952	0.4178	-0.2001	Mosaic Loss
ACC	TCGA-OR-A5J5-01A-11D-A29H-01	3	176149354	197808975	0.4142	-0.2189	Mosaic Loss
ACC	TCGA-OR-A5J5-01A-11D-A29H-01	4	178376638	178820569	0.4135	-0.1578	Mosaic Loss
ACC	TCGA-OR-A5J5-01A-11D-A29H-01	4	179712548	180621780	0.424	-0.1994	Mosaic Loss
ACC	TCGA-OR-A5J5-01A-11D-A29H-01	4	183032807	183376239	0.4224	-0.1793	Mosaic Loss
ACC	TCGA-OR-A5J5-01A-11D-A29H-01	5	151357064	163179965	0.4107	-0.2386	Mosaic Loss
ACC	TCGA-OR-A5J5-01A-11D-A29H-01	6	366333	80582193	0.4172	-0.2274	Mosaic Loss
ACC	TCGA-OR-A5J5-01A-11D-A29H-01	6	80845522	90876844	0.4245	-0.1714	Mosaic Loss
ACC	TCGA-OR-A5J5-01A-11D-A29H-01	6	91108391	170905977	0.4187	-0.1799	Mosaic Loss
ACC	TCGA-OR-A5J5-01A-11D-A29H-01	7	44167	159116965	0.1625	0.1325	Mosaic Gain
ACC	TCGA-OR-A5J5-01A-11D-A29H-01	8	113565	146293414	0.1604	0.0918	Mosaic Gain
ACC	TCGA-OR-A5J5-01A-11D-A29H-01	9	46587	120255966	0.4815	0.3977	Mosaic Gain
ACC	TCGA-OR-A5J5-01A-11D-A29H-01	9	120299808	139035609	0.4713	0.3399	Mosaic Gain
ACC	TCGA-OR-A5J5-01A-11D-A29H-01	9	139271355	141071475	0.4776	0.2889	Inherited Duplication
ACC	TCGA-OR-A5J5-01A-11D-A29H-01	10	104427	110796043	0.1579	0.1377	Mosaic Gain
ACC	TCGA-OR-A5J5-01A-11D-A29H-01	10	111330820	119129132	0.1586	0.1391	Mosaic Gain
ACC	TCGA-OR-A5J5-01A-11D-A29H-01	10	119195881	135434551	0.1567	0.1282	Mosaic Gain
ACC	TCGA-OR-A5J5-01A-11D-A29H-01	11	211447	19635453	0.4112	-0.1978	Mosaic Loss
ACC	TCGA-OR-A5J5-01A-11D-A29H-01	11	19868759	134933972	0.4173	-0.1992	Mosaic Loss
ACC	TCGA-OR-A5J5-01A-11D-A29H-01	13	19307316	91181082	0.4215	-0.1713	Mosaic Loss
ACC	TCGA-OR-A5J5-01A-11D-A29H-01	13	91452272	108132448	0.4187	-0.1976	Mosaic Loss
ACC	TCGA-OR-A5J5-01A-11D-A29H-01	13	108212020	111545112	0.4121	-0.2132	Mosaic Loss
ACC	TCGA-OR-A5J5-01A-11D-A29H-01	13	111664784	115027516	0.1588	0.6857	Mosaic Gain
ACC	TCGA-OR-A5J5-01A-11D-A29H-01	15	22866621	102400037	0.4142	-0.2049	Mosaic Loss
ACC	TCGA-OR-A5J5-01A-11D-A29H-01	16	86671	1852775	0.0918	0.2674	Inherited Duplication
ACC	TCGA-OR-A5J5-01A-11D-A29H-01	16	2964283	28490517	0.0781	0.3396	Mosaic Gain
ACC	TCGA-OR-A5J5-01A-11D-A29H-01	17	38924	9100040	0.4082	-0.1838	Mosaic Loss
ACC	TCGA-OR-A5J5-01A-11D-A29H-01	17	9240240	81048659	0.4098	-0.2196	Mosaic Loss
ACC	TCGA-OR-A5J5-01A-11D-A29H-01	18	100949	78014582	0.4172	-0.1999	Mosaic Loss
ACC	TCGA-OR-A5J5-01A-11D-A29H-01	20	61795	62912463	0.4068	-0.2503	Mosaic Loss
ACC	TCGA-OR-A5J5-01A-11D-A29H-01	21	10962411	16992693	0.4159	-0.2351	Mosaic Loss
ACC	TCGA-OR-A5J5-01A-11D-A29H-01	21	17062379	48084820	0.4139	-0.2038	Mosaic Loss
ACC	TCGA-OR-A5J5-01A-11D-A29H-01	22	16055171	50100662	0.4056	-0.2228	Mosaic Loss
ACC	TCGA-OR-A5J6-01A-31D-A29H-01	1	4028924	249198692	0.1286	-0.0718	Mosaic Loss
ACC	TCGA-OR-A5J6-01A-31D-A29H-01	2	15703	131788	0.074	0.1242	Inherited Duplication
ACC	TCGA-OR-A5J6-01A-31D-A29H-01	2	242531522	243048760	0.0792	0.1622	Inherited Duplication
ACC	TCGA-OR-A5J6-01A-31D-A29H-01	3	69244	89275906	0.1314	-0.0473	Mosaic cnLOH
ACC	TCGA-OR-A5J6-01A-31D-A29H-01	3	89315893	184929303	0.3172	-0.3304	Mosaic Loss
ACC	TCGA-OR-A5J6-01A-31D-A29H-01	3	186644343	197808975	0.32	-0.3296	Mosaic Loss
ACC	TCGA-OR-A5J6-01A-31D-A29H-01	4	61981	190473388	0.1341	-0.0446	Mosaic cnLOH
ACC	TCGA-OR-A5J6-01A-31D-A29H-01	6	136979240	170905977	0.0978	0.3537	Mosaic Gain
ACC	TCGA-OR-A5J6-01A-31D-A29H-01	9	46587	104803837	0.1327	-0.0415	Mosaic cnLOH
ACC	TCGA-OR-A5J6-01A-31D-A29H-01	9	105725015	141071475	0.1274	-0.0488	Mosaic cnLOH
ACC	TCGA-OR-A5J6-01A-31D-A29H-01	10	104427	135434551	0.1294	-0.0486	Mosaic cnLOH
ACC	TCGA-OR-A5J6-01A-31D-A29H-01	11	211447	134942626	0.1308	-0.0532	Mosaic Loss
ACC	TCGA-OR-A5J6-01A-31D-A29H-01	13	19523949	115106996	0.1323	-0.023	Mosaic cnLOH
ACC	TCGA-OR-A5J6-01A-31D-A29H-01	14	20211644	23842739	0.3169	-0.2985	Mosaic Loss
ACC	TCGA-OR-A5J6-01A-31D-A29H-01	14	23873092	107285437	0.3149	-0.3065	Mosaic Loss
ACC	TCGA-OR-A5J6-01A-31D-A29H-01	15	20071673	102400037	0.1257	-0.0437	Mosaic cnLOH
ACC	TCGA-OR-A5J6-01A-31D-A29H-01	16	86671	90163275	0.1469	-0.1212	Mosaic Loss
ACC	TCGA-OR-A5J6-01A-31D-A29H-01	17	6689	77143460	0.1259	-0.0503	Mosaic Loss
ACC	TCGA-OR-A5J6-01A-31D-A29H-01	17	78160212	81048659	0.1257	-0.0339	Mosaic cnLOH
ACC	TCGA-OR-A5J6-01A-31D-A29H-01	18	100949	78014582	0.3197	-0.3165	Mosaic Loss
ACC	TCGA-OR-A5J7-01A-11D-A29H-01	1	761732	249198692	0.4326	0.0055	Mosaic cnLOH
ACC	TCGA-OR-A5J7-01A-11D-A29H-01	2	15703	3280842	0.1487	0.1483	Mosaic Gain
ACC	TCGA-OR-A5J7-01A-11D-A29H-01	2	3841699	198054958	0.1543	0.1774	Mosaic Gain
ACC	TCGA-OR-A5J7-01A-11D-A29H-01	2	198132524	231727399	0.2413	0.3991	Mosaic Gain
ACC	TCGA-OR-A5J7-01A-11D-A29H-01	2	232464308	242644309	0.1517	0.1444	Mosaic Gain
ACC	TCGA-OR-A5J7-01A-11D-A29H-01	3	37432806	37662867	0.1334	0.1504	Inherited Duplication
ACC	TCGA-OR-A5J7-01A-11D-A29H-01	3	138704292	140354037	0.1475	0.1207	Inherited Duplication
ACC	TCGA-OR-A5J7-01A-11D-A29H-01	3	153447119	169022465	0.1541	0.1654	Mosaic Gain
ACC	TCGA-OR-A5J7-01A-11D-A29H-01	3	171801685	183280319	0.1543	0.1763	Mosaic Gain
ACC	TCGA-OR-A5J7-01A-11D-A29H-01	3	184170992	197808975	0.1479	0.1699	Mosaic Gain
ACC	TCGA-OR-A5J7-01A-11D-A29H-01	4	61981	57825140	0.1489	0.1563	Mosaic Gain
ACC	TCGA-OR-A5J7-01A-11D-A29H-01	4	65895585	67004839	0.1392	0.2038	Inherited Duplication
ACC	TCGA-OR-A5J7-01A-11D-A29H-01	4	182272630	183275327	0.3067	-0.5504	Mosaic Loss
ACC	TCGA-OR-A5J7-01A-11D-A29H-01	4	184651150	185354960	0.1538	0.1526	Inherited Duplication
ACC	TCGA-OR-A5J7-01A-11D-A29H-01	5	17704161	57937240	0.152	0.1544	Mosaic Gain
ACC	TCGA-OR-A5J7-01A-11D-A29H-01	5	64087023	132136627	0.151	0.1647	Mosaic Gain
ACC	TCGA-OR-A5J7-01A-11D-A29H-01	5	132804930	180692833	0.1501	0.1404	Mosaic Gain
ACC	TCGA-OR-A5J7-01A-11D-A29H-01	6	165632	37609305	0.1519	0.132	Mosaic Gain
ACC	TCGA-OR-A5J7-01A-11D-A29H-01	6	38148413	170905977	0.3898	-0.0449	Mosaic cnLOH
ACC	TCGA-OR-A5J7-01A-11D-A29H-01	7	44167	912755	0.1465	0.1593	Inherited Duplication
ACC	TCGA-OR-A5J7-01A-11D-A29H-01	7	2139990	32305274	0.1515	0.1509	Mosaic Gain
ACC	TCGA-OR-A5J7-01A-11D-A29H-01	7	33568567	95180793	0.1505	0.1421	Mosaic Gain
ACC	TCGA-OR-A5J7-01A-11D-A29H-01	7	96028585	159116965	0.1541	0.1464	Mosaic Gain
ACC	TCGA-OR-A5J7-01A-11D-A29H-01	8	113565	146293414	0.4066	-0.1657	Mosaic Loss
ACC	TCGA-OR-A5J7-01A-11D-A29H-01	9	3766183	5081585	0.1475	0.1556	Inherited Duplication
ACC	TCGA-OR-A5J7-01A-11D-A29H-01	9	31204943	36719564	0.179	0.2613	Mosaic Gain
ACC	TCGA-OR-A5J7-01A-11D-A29H-01	9	38683287	141071475	0.153	0.172	Mosaic Gain
ACC	TCGA-OR-A5J7-01A-11D-A29H-01	10	104427	1327807	0.1055	0.5155	Inherited Duplication
ACC	TCGA-OR-A5J7-01A-11D-A29H-01	10	4140867	4421518	0.0896	0.6329	Inherited Duplication
ACC	TCGA-OR-A5J7-01A-11D-A29H-01	10	6657775	10878166	0.103	0.5735	Mosaic Gain
ACC	TCGA-OR-A5J7-01A-11D-A29H-01	10	12709724	22940973	0.1094	0.574	Mosaic Gain
ACC	TCGA-OR-A5J7-01A-11D-A29H-01	10	26718561	30291963	0.1082	0.5665	Mosaic Gain
ACC	TCGA-OR-A5J7-01A-11D-A29H-01	10	31347784	70622121	0.145	0.2497	Mosaic Gain
ACC	TCGA-OR-A5J7-01A-11D-A29H-01	11	51441936	134942626	0.1551	0.1684	Mosaic Gain
ACC	TCGA-OR-A5J7-01A-11D-A29H-01	12	161382	31297871	0.1495	0.1534	Mosaic Gain
ACC	TCGA-OR-A5J7-01A-11D-A29H-01	12	32535100	38353816	0.164	0.1621	Mosaic Gain
ACC	TCGA-OR-A5J7-01A-11D-A29H-01	12	41267529	46245077	0.1645	0.1724	Mosaic Gain
ACC	TCGA-OR-A5J7-01A-11D-A29H-01	12	48255859	52069467	0.131	0.1164	Mosaic Gain
ACC	TCGA-OR-A5J7-01A-11D-A29H-01	12	93524295	94180751	0.0859	0.5388	Inherited Duplication
ACC	TCGA-OR-A5J7-01A-11D-A29H-01	12	118467553	133777645	0.1457	0.1338	Mosaic Gain
ACC	TCGA-OR-A5J7-01A-11D-A29H-01	13	19045628	33065443	0.3175	-0.5214	Mosaic Loss
ACC	TCGA-OR-A5J7-01A-11D-A29H-01	13	33593100	114901396	0.3174	-0.5111	Mosaic Loss
ACC	TCGA-OR-A5J7-01A-11D-A29H-01	14	74315163	74479217	0.1749	0.2797	Inherited Duplication
ACC	TCGA-OR-A5J7-01A-11D-A29H-01	15	22784095	89005338	0.4109	-0.1254	Mosaic Loss
ACC	TCGA-OR-A5J7-01A-11D-A29H-01	15	89028937	102120977	0.4035	-0.1354	Mosaic Loss
ACC	TCGA-OR-A5J7-01A-11D-A29H-01	16	6706076	7329807	0.2982	-0.5335	Mosaic Loss
ACC	TCGA-OR-A5J7-01A-11D-A29H-01	16	49927513	51133202	0.1283	-0.0469	Mosaic cnLOH
ACC	TCGA-OR-A5J7-01A-11D-A29H-01	17	411369	80977131	0.4037	-0.1386	Mosaic Loss
ACC	TCGA-OR-A5J7-01A-11D-A29H-01	18	20085103	21120444	0.1637	0.1873	Inherited Duplication
ACC	TCGA-OR-A5J7-01A-11D-A29H-01	21	14969265	48084820	0.1533	0.1732	Mosaic Gain
ACC	TCGA-OR-A5J7-01A-11D-A29H-01	22	16055171	25931372	0.3015	-0.5548	Mosaic Loss
ACC	TCGA-OR-A5J7-01A-11D-A29H-01	22	26167114	51219006	0.3058	-0.5203	Mosaic Loss
ACC	TCGA-OR-A5J8-01A-11D-A29H-01	1	761732	241183893	0.3227	0.0331	Mosaic cnLOH
ACC	TCGA-OR-A5J8-01A-11D-A29H-01	1	241907817	249198692	0.3219	-0.0116	Mosaic cnLOH
ACC	TCGA-OR-A5J8-01A-11D-A29H-01	2	15703	193737730	0.3372	0.0964	Mosaic Gain
ACC	TCGA-OR-A5J8-01A-11D-A29H-01	2	194970694	243048760	0.3373	0.1024	Mosaic Gain
ACC	TCGA-OR-A5J8-01A-11D-A29H-01	3	69244	197808975	0.3141	-0.0014	Mosaic cnLOH
ACC	TCGA-OR-A5J8-01A-11D-A29H-01	4	61981	190930894	0.314	-0.005	Mosaic cnLOH
ACC	TCGA-OR-A5J8-01A-11D-A29H-01	5	36344	1090756	0.0657	0.2722	Inherited Duplication
ACC	TCGA-OR-A5J8-01A-11D-A29H-01	5	1436408	3845917	0.0657	0.2044	Mosaic Gain
ACC	TCGA-OR-A5J8-01A-11D-A29H-01	5	9956601	16270599	0.2002	0.6436	Mosaic Gain
ACC	TCGA-OR-A5J8-01A-11D-A29H-01	5	16469415	46383335	0.0649	0.3079	Mosaic Gain
ACC	TCGA-OR-A5J8-01A-11D-A29H-01	5	50233199	180692833	0.1783	-0.0425	Mosaic cnLOH
ACC	TCGA-OR-A5J8-01A-11D-A29H-01	6	165632	6161662	0.1911	0.0806	Mosaic Gain
ACC	TCGA-OR-A5J8-01A-11D-A29H-01	6	6250284	14979137	0.0905	-0.2052	Mosaic Loss
ACC	TCGA-OR-A5J8-01A-11D-A29H-01	6	15250052	23655053	0.1945	0.0556	Mosaic Gain
ACC	TCGA-OR-A5J8-01A-11D-A29H-01	6	24463020	26546808	0.0917	-0.2019	Mosaic Loss
ACC	TCGA-OR-A5J8-01A-11D-A29H-01	6	51010200	134841143	0.079	0.1615	Mosaic Gain
ACC	TCGA-OR-A5J8-01A-11D-A29H-01	6	142391132	145843866	0.1123	0.5394	Mosaic Gain
ACC	TCGA-OR-A5J8-01A-11D-A29H-01	6	150371769	168904398	0.0759	0.1733	Mosaic Gain
ACC	TCGA-OR-A5J8-01A-11D-A29H-01	7	12784041	14235801	0.2826	-0.1665	Mosaic Loss
ACC	TCGA-OR-A5J8-01A-11D-A29H-01	7	14663623	16514474	0.0576	0.3563	Inherited Duplication
ACC	TCGA-OR-A5J8-01A-11D-A29H-01	7	83163876	84955795	0.1182	0.5772	Inherited Duplication
ACC	TCGA-OR-A5J8-01A-11D-A29H-01	7	158986079	159116965	0.0236	0.2775	Inherited Duplication
ACC	TCGA-OR-A5J8-01A-11D-A29H-01	8	113565	146293414	0.2982	-0.0851	Mosaic Loss
ACC	TCGA-OR-A5J8-01A-11D-A29H-01	9	46587	38767942	0.2896	-0.1071	Mosaic Loss
ACC	TCGA-OR-A5J8-01A-11D-A29H-01	10	104427	135434551	0.3058	-0.0158	Mosaic cnLOH
ACC	TCGA-OR-A5J8-01A-11D-A29H-01	11	211447	134942626	0.3115	-0.0068	Mosaic cnLOH
ACC	TCGA-OR-A5J8-01A-11D-A29H-01	12	161382	133777645	0.1594	0.317	Mosaic Gain
ACC	TCGA-OR-A5J8-01A-11D-A29H-01	13	19045628	115106996	0.3123	0.0018	Mosaic cnLOH
ACC	TCGA-OR-A5J8-01A-11D-A29H-01	14	20211644	38788529	0.1506	-0.0393	Mosaic cnLOH
ACC	TCGA-OR-A5J8-01A-11D-A29H-01	14	38859403	47625558	0.1473	-0.1167	Mosaic Loss
ACC	TCGA-OR-A5J8-01A-11D-A29H-01	14	48325027	101700618	0.1412	-0.0085	Mosaic cnLOH
ACC	TCGA-OR-A5J8-01A-11D-A29H-01	15	22958758	102400037	0.3169	0.0261	Mosaic cnLOH
ACC	TCGA-OR-A5J8-01A-11D-A29H-01	16	86671	90163275	0.3072	-0.0075	Mosaic cnLOH
ACC	TCGA-OR-A5J8-01A-11D-A29H-01	17	6689	81048659	0.3357	0.1307	Mosaic Gain
ACC	TCGA-OR-A5J8-01A-11D-A29H-01	18	100949	20531677	0.093	0.2546	Mosaic Gain
ACC	TCGA-OR-A5J8-01A-11D-A29H-01	19	2145450	17426501	0.3042	-0.0106	Mosaic cnLOH
ACC	TCGA-OR-A5J8-01A-11D-A29H-01	19	19023853	59093464	0.3044	-0.0144	Mosaic cnLOH
ACC	TCGA-OR-A5J8-01A-11D-A29H-01	20	61795	26232228	0.1621	-0.0437	Mosaic cnLOH
ACC	TCGA-OR-A5J8-01A-11D-A29H-01	20	29846303	62912463	0.0765	0.1443	Mosaic Gain
ACC	TCGA-OR-A5J8-01A-11D-A29H-01	21	10962411	42180291	0.2728	-0.1744	Mosaic Loss
ACC	TCGA-OR-A5J8-01A-11D-A29H-01	21	42591611	48084820	0.2748	-0.1076	Mosaic Loss
ACC	TCGA-OR-A5J8-01A-11D-A29H-01	22	16055171	51219006	0.2944	-0.0385	Mosaic cnLOH
ACC	TCGA-OR-A5J9-01A-11D-A29H-01	1	2027901	9304205	0.3009	-0.5332	Mosaic Loss
ACC	TCGA-OR-A5J9-01A-11D-A29H-01	1	249121232	249198692	0.0682	-0.0932	Mosaic Loss
ACC	TCGA-OR-A5J9-01A-11D-A29H-01	2	15703	144587571	0.4037	-0.1052	Mosaic Loss
ACC	TCGA-OR-A5J9-01A-11D-A29H-01	2	145765851	162950320	0.4056	-0.0638	Mosaic Loss
ACC	TCGA-OR-A5J9-01A-11D-A29H-01	2	163137181	243048760	0.4054	-0.1064	Mosaic Loss
ACC	TCGA-OR-A5J9-01A-11D-A29H-01	3	69244	39326283	0.4084	-0.0842	Mosaic Loss
ACC	TCGA-OR-A5J9-01A-11D-A29H-01	3	39811908	55845788	0.4048	-0.128	Mosaic Loss
ACC	TCGA-OR-A5J9-01A-11D-A29H-01	3	56709558	90264056	0.4121	-0.0723	Mosaic Loss
ACC	TCGA-OR-A5J9-01A-11D-A29H-01	4	3282848	20949191	0.1041	0.5462	Mosaic Gain
ACC	TCGA-OR-A5J9-01A-11D-A29H-01	4	23267024	31700094	0.104	0.6253	Mosaic Gain
ACC	TCGA-OR-A5J9-01A-11D-A29H-01	4	36164628	190930894	0.148	0.2742	Mosaic Gain
ACC	TCGA-OR-A5J9-01A-11D-A29H-01	5	36344	5823575	0.1008	0.4867	Mosaic Gain
ACC	TCGA-OR-A5J9-01A-11D-A29H-01	5	10644023	13932117	0.1018	0.5906	Mosaic Gain
ACC	TCGA-OR-A5J9-01A-11D-A29H-01	5	24625147	26106172	0.1024	0.6525	Inherited Duplication
ACC	TCGA-OR-A5J9-01A-11D-A29H-01	5	50152455	180692833	0.1491	0.19	Mosaic Gain
ACC	TCGA-OR-A5J9-01A-11D-A29H-01	6	165632	205920	0.4065	-0.3209	Mosaic Loss
ACC	TCGA-OR-A5J9-01A-11D-A29H-01	6	475810	44133649	0.4033	-0.142	Mosaic Loss
ACC	TCGA-OR-A5J9-01A-11D-A29H-01	6	44250853	154719380	0.4115	-0.056	Mosaic Loss
ACC	TCGA-OR-A5J9-01A-11D-A29H-01	6	155772039	170905977	0.4042	-0.0951	Mosaic Loss
ACC	TCGA-OR-A5J9-01A-11D-A29H-01	7	44167	64265324	0.4031	-0.1225	Mosaic Loss
ACC	TCGA-OR-A5J9-01A-11D-A29H-01	7	64440040	78974072	0.1456	0.1438	Mosaic Gain
ACC	TCGA-OR-A5J9-01A-11D-A29H-01	7	79509411	142099986	0.1486	0.2122	Mosaic Gain
ACC	TCGA-OR-A5J9-01A-11D-A29H-01	7	142555251	158943746	0.1541	0.16	Mosaic Gain
ACC	TCGA-OR-A5J9-01A-11D-A29H-01	9	218183	141071475	0.403	-0.0972	Mosaic Loss
ACC	TCGA-OR-A5J9-01A-11D-A29H-01	10	104427	297633	0.1521	0.0311	Mosaic cnLOH
ACC	TCGA-OR-A5J9-01A-11D-A29H-01	10	334799	53623115	0.1511	0.1792	Mosaic Gain
ACC	TCGA-OR-A5J9-01A-11D-A29H-01	10	53803755	135434551	0.1494	0.1798	Mosaic Gain
ACC	TCGA-OR-A5J9-01A-11D-A29H-01	11	211447	2838413	0.3884	-0.1307	Mosaic Loss
ACC	TCGA-OR-A5J9-01A-11D-A29H-01	11	3061992	60335964	0.4073	-0.0964	Mosaic Loss
ACC	TCGA-OR-A5J9-01A-11D-A29H-01	11	60585655	72279550	0.3933	-0.1618	Mosaic Loss
ACC	TCGA-OR-A5J9-01A-11D-A29H-01	11	72949543	134932565	0.3436	-0.3974	Mosaic Loss
ACC	TCGA-OR-A5J9-01A-11D-A29H-01	13	19450806	84976046	0.4135	-0.0481	Mosaic cnLOH
ACC	TCGA-OR-A5J9-01A-11D-A29H-01	13	85033851	115106996	0.1507	0.2249	Mosaic Gain
ACC	TCGA-OR-A5J9-01A-11D-A29H-01	14	20211644	22393148	0.1081	0.5632	Mosaic Gain
ACC	TCGA-OR-A5J9-01A-11D-A29H-01	14	24770369	33970530	0.1591	0.3606	Mosaic Gain
ACC	TCGA-OR-A5J9-01A-11D-A29H-01	14	35949018	41916228	0.4076	-0.0608	Mosaic Loss
ACC	TCGA-OR-A5J9-01A-11D-A29H-01	14	42476299	43570234	0.4188	0.0175	Mosaic cnLOH
ACC	TCGA-OR-A5J9-01A-11D-A29H-01	14	47160902	49947298	0.4284	-0.02	Mosaic cnLOH
ACC	TCGA-OR-A5J9-01A-11D-A29H-01	14	50822518	67948482	0.4045	-0.1055	Mosaic Loss
ACC	TCGA-OR-A5J9-01A-11D-A29H-01	14	68171340	69231864	0.1828	0.6912	Inherited Duplication
ACC	TCGA-OR-A5J9-01A-11D-A29H-01	14	69981608	78453172	0.3982	-0.1211	Mosaic Loss
ACC	TCGA-OR-A5J9-01A-11D-A29H-01	14	78960255	100098848	0.4026	-0.0899	Mosaic Loss
ACC	TCGA-OR-A5J9-01A-11D-A29H-01	14	100653787	107224299	0.3973	-0.1231	Mosaic Loss
ACC	TCGA-OR-A5J9-01A-11D-A29H-01	16	256278	90163275	0.1483	0.154	Mosaic Gain
ACC	TCGA-OR-A5J9-01A-11D-A29H-01	17	6689	49757799	0.403	-0.1126	Mosaic Loss
ACC	TCGA-OR-A5J9-01A-11D-A29H-01	17	49808242	81048659	0.4044	-0.124	Mosaic Loss
ACC	TCGA-OR-A5J9-01A-11D-A29H-01	18	100949	77982107	0.4073	-0.0919	Mosaic Loss
ACC	TCGA-OR-A5J9-01A-11D-A29H-01	20	134476	62912463	0.1478	0.1244	Mosaic Gain
ACC	TCGA-OR-A5J9-01A-11D-A29H-01	21	10962411	48084820	0.1501	0.1968	Mosaic Gain
ACC	TCGA-OR-A5J9-01A-11D-A29H-01	22	16055171	51219006	0.3044	-0.5556	Mosaic Loss
ACC	TCGA-OR-A5JA-01A-11D-A29H-01	1	926431	101078400	0.4345	-0.0273	Mosaic cnLOH
ACC	TCGA-OR-A5JA-01A-11D-A29H-01	1	161979841	249198692	0.419	-0.1532	Mosaic Loss
ACC	TCGA-OR-A5JA-01A-11D-A29H-01	2	15703	243048760	0.4072	-0.209	Mosaic Loss
ACC	TCGA-OR-A5JA-01A-11D-A29H-01	3	69244	197808975	0.4071	-0.2061	Mosaic Loss
ACC	TCGA-OR-A5JA-01A-11D-A29H-01	4	28450862	43856047	0.1228	0.3604	Mosaic Gain
ACC	TCGA-OR-A5JA-01A-11D-A29H-01	4	44130266	52750410	0.0459	0.2037	Mosaic Gain
ACC	TCGA-OR-A5JA-01A-11D-A29H-01	4	59388220	76282893	0.0497	0.2127	Mosaic Gain
ACC	TCGA-OR-A5JA-01A-11D-A29H-01	4	85867313	89978867	0.0455	0.2282	Mosaic Gain
ACC	TCGA-OR-A5JA-01A-11D-A29H-01	4	183162207	190930894	0.076	-0.086	Mosaic Loss
ACC	TCGA-OR-A5JA-01A-11D-A29H-01	5	36344	166308588	0.0677	0.2076	Mosaic Gain
ACC	TCGA-OR-A5JA-01A-11D-A29H-01	5	166367070	180692833	0.1044	0.0985	Mosaic Gain
ACC	TCGA-OR-A5JA-01A-11D-A29H-01	6	165632	170891043	0.0633	0.2313	Mosaic Gain
ACC	TCGA-OR-A5JA-01A-11D-A29H-01	7	62190868	159116965	0.0644	0.2246	Mosaic Gain
ACC	TCGA-OR-A5JA-01A-11D-A29H-01	8	113565	1774826	0.4039	-0.2285	Mosaic Loss
ACC	TCGA-OR-A5JA-01A-11D-A29H-01	8	1982626	146293414	0.4039	-0.248	Mosaic Loss
ACC	TCGA-OR-A5JA-01A-11D-A29H-01	9	46587	18989893	0.2065	0.0338	Mosaic cnLOH
ACC	TCGA-OR-A5JA-01A-11D-A29H-01	9	19013483	28501214	0.0884	0.2132	Mosaic Gain
ACC	TCGA-OR-A5JA-01A-11D-A29H-01	9	28652515	32203285	0.1158	0.1978	Mosaic Gain
ACC	TCGA-OR-A5JA-01A-11D-A29H-01	9	32224466	140693036	0.0767	0.2207	Mosaic Gain
ACC	TCGA-OR-A5JA-01A-11D-A29H-01	10	104427	135434551	0.4073	-0.2009	Mosaic Loss
ACC	TCGA-OR-A5JA-01A-11D-A29H-01	11	211447	134942626	0.4073	-0.2028	Mosaic Loss
ACC	TCGA-OR-A5JA-01A-11D-A29H-01	12	161382	229347	0.0241	0.4066	Inherited Duplication
ACC	TCGA-OR-A5JA-01A-11D-A29H-01	12	71904790	86730126	0.0774	0.4647	Mosaic Gain
ACC	TCGA-OR-A5JA-01A-11D-A29H-01	12	95104524	124789550	0.0578	0.2132	Mosaic Gain
ACC	TCGA-OR-A5JA-01A-11D-A29H-01	12	124988358	133777645	0.2639	-0.1301	Mosaic Loss
ACC	TCGA-OR-A5JA-01A-11D-A29H-01	13	19045628	115074878	0.4295	-0.0655	Mosaic Loss
ACC	TCGA-OR-A5JA-01A-11D-A29H-01	14	45803438	56421080	0.132	0.1469	Mosaic Gain
ACC	TCGA-OR-A5JA-01A-11D-A29H-01	14	86324987	107133196	0.1346	0.1318	Mosaic Gain
ACC	TCGA-OR-A5JA-01A-11D-A29H-01	15	58455198	100502293	0.1321	0.1154	Mosaic Gain
ACC	TCGA-OR-A5JA-01A-11D-A29H-01	15	100805619	102400037	0.1301	0.1023	Inherited Duplication
ACC	TCGA-OR-A5JA-01A-11D-A29H-01	16	86671	89626894	0.0605	0.2263	Mosaic Gain
ACC	TCGA-OR-A5JA-01A-11D-A29H-01	17	38761	81048659	0.4056	-0.1967	Mosaic Loss
ACC	TCGA-OR-A5JA-01A-11D-A29H-01	18	100949	77984345	0.4159	-0.1279	Mosaic Loss
ACC	TCGA-OR-A5JA-01A-11D-A29H-01	19	301668	11227602	0.1165	0.2875	Mosaic Gain
ACC	TCGA-OR-A5JA-01A-11D-A29H-01	20	61795	15063214	0.4037	-0.2387	Mosaic Loss
ACC	TCGA-OR-A5JA-01A-11D-A29H-01	20	15702907	62912463	0.4039	-0.2419	Mosaic Loss
ACC	TCGA-OR-A5JA-01A-11D-A29H-01	21	10962411	48084820	0.4075	-0.2067	Mosaic Loss
ACC	TCGA-OR-A5JA-01A-11D-A29H-01	22	16055171	33840160	0.4049	-0.198	Mosaic Loss
ACC	TCGA-OR-A5JA-01A-11D-A29H-01	22	44494466	51219006	0.4102	-0.199	Mosaic Loss
ACC	TCGA-OR-A5JB-01A-11D-A29H-01	1	947034	14876032	0.1558	0.3802	Mosaic Gain
ACC	TCGA-OR-A5JB-01A-11D-A29H-01	1	43411596	120345451	0.1596	0.3719	Mosaic Gain
ACC	TCGA-OR-A5JB-01A-11D-A29H-01	1	156700845	249120684	0.3739	0.0733	Mosaic Gain
ACC	TCGA-OR-A5JB-01A-11D-A29H-01	3	262775	197808975	0.3413	-0.0316	Mosaic cnLOH
ACC	TCGA-OR-A5JB-01A-11D-A29H-01	4	61981	179947968	0.282	-0.2511	Mosaic Loss
ACC	TCGA-OR-A5JB-01A-11D-A29H-01	4	180715058	190755641	0.2805	-0.2478	Mosaic Loss
ACC	TCGA-OR-A5JB-01A-11D-A29H-01	6	62069344	170905977	0.2843	-0.2364	Mosaic Loss
ACC	TCGA-OR-A5JB-01A-11D-A29H-01	7	156308688	159116965	0.2817	-0.2718	Mosaic Loss
ACC	TCGA-OR-A5JB-01A-11D-A29H-01	8	113565	146293414	0.3531	-0.0177	Mosaic cnLOH
ACC	TCGA-OR-A5JB-01A-11D-A29H-01	12	57859932	90667674	0.2035	-0.1614	Mosaic Loss
ACC	TCGA-OR-A5JB-01A-11D-A29H-01	12	95864641	110278563	0.1026	-0.0288	Mosaic cnLOH
ACC	TCGA-OR-A5JB-01A-11D-A29H-01	13	19307316	115075317	0.3035	-0.1718	Mosaic Loss
ACC	TCGA-OR-A5JB-01A-11D-A29H-01	15	81174544	82421037	0.1417	0.4064	Inherited Duplication
ACC	TCGA-OR-A5JB-01A-11D-A29H-01	15	93978068	95081834	0.157	0.384	Inherited Duplication
ACC	TCGA-OR-A5JB-01A-11D-A29H-01	15	96608137	100366987	0.1487	0.3869	Mosaic Gain
ACC	TCGA-OR-A5JB-01A-11D-A29H-01	15	100956515	102400037	0.2163	0.5535	Inherited Duplication
ACC	TCGA-OR-A5JB-01A-11D-A29H-01	16	86671	52102476	0.3188	-0.1511	Mosaic Loss
ACC	TCGA-OR-A5JB-01A-11D-A29H-01	16	75997549	83042192	0.2832	-0.2653	Mosaic Loss
ACC	TCGA-OR-A5JB-01A-11D-A29H-01	16	89541243	90163275	0.0772	0.2127	Inherited Duplication
ACC	TCGA-OR-A5JB-01A-11D-A29H-01	17	6689	81048659	0.3342	-0.053	Mosaic Loss
ACC	TCGA-OR-A5JB-01A-11D-A29H-01	18	100949	78014582	0.2836	-0.2539	Mosaic Loss
ACC	TCGA-OR-A5JB-01A-11D-A29H-01	19	260912	24071154	0.2748	-0.2749	Mosaic Loss
ACC	TCGA-OR-A5JB-01A-11D-A29H-01	20	133900	7940429	0.2965	-0.2332	Mosaic Loss
ACC	TCGA-OR-A5JB-01A-11D-A29H-01	20	12058581	25593871	0.2716	-0.3101	Mosaic Loss
ACC	TCGA-OR-A5JB-01A-11D-A29H-01	22	16490204	51219006	0.3574	0.0315	Mosaic cnLOH
ACC	TCGA-OR-A5JC-01A-11D-A29H-01	1	761732	249198692	0.3527	-0.1816	Mosaic Loss
ACC	TCGA-OR-A5JC-01A-11D-A29H-01	2	15703	243014630	0.3544	-0.1732	Mosaic Loss
ACC	TCGA-OR-A5JC-01A-11D-A29H-01	3	174420052	175027803	0.2344	-0.4286	Mosaic Loss
ACC	TCGA-OR-A5JC-01A-11D-A29H-01	4	61981	190930894	0.1381	0.097	Mosaic Gain
ACC	TCGA-OR-A5JC-01A-11D-A29H-01	5	36344	1826630	0.1314	0.3339	Inherited Duplication
ACC	TCGA-OR-A5JC-01A-11D-A29H-01	5	2616477	8548224	0.1065	0.3529	Mosaic Gain
ACC	TCGA-OR-A5JC-01A-11D-A29H-01	5	11874565	14927488	0.0821	0.4139	Mosaic Gain
ACC	TCGA-OR-A5JC-01A-11D-A29H-01	5	25615591	67941677	0.0816	0.427	Mosaic Gain
ACC	TCGA-OR-A5JC-01A-11D-A29H-01	5	70966060	76858875	0.0821	0.4245	Mosaic Gain
ACC	TCGA-OR-A5JC-01A-11D-A29H-01	5	79181680	93781522	0.081	0.4433	Mosaic Gain
ACC	TCGA-OR-A5JC-01A-11D-A29H-01	5	107126918	141562334	0.0779	0.4326	Mosaic Gain
ACC	TCGA-OR-A5JC-01A-11D-A29H-01	5	142872510	145239004	0.0764	0.4126	Mosaic Gain
ACC	TCGA-OR-A5JC-01A-11D-A29H-01	5	146396622	155305036	0.077	0.4305	Mosaic Gain
ACC	TCGA-OR-A5JC-01A-11D-A29H-01	5	156805904	177941617	0.0789	0.4163	Mosaic Gain
ACC	TCGA-OR-A5JC-01A-11D-A29H-01	6	36723572	37021260	0.1309	0.3854	Inherited Duplication
ACC	TCGA-OR-A5JC-01A-11D-A29H-01	6	42159132	43221909	0.169	0.1704	Inherited Duplication
ACC	TCGA-OR-A5JC-01A-11D-A29H-01	6	170858045	170905977	0.0554	0.1521	Inherited Duplication
ACC	TCGA-OR-A5JC-01A-11D-A29H-01	7	44167	159116965	0.284	-0.1233	Mosaic Loss
ACC	TCGA-OR-A5JC-01A-11D-A29H-01	8	113565	146293414	0.1961	0.2013	Mosaic Gain
ACC	TCGA-OR-A5JC-01A-11D-A29H-01	9	46587	141071475	0.3544	-0.1619	Mosaic Loss
ACC	TCGA-OR-A5JC-01A-11D-A29H-01	10	104427	134682802	0.1359	0.1075	Mosaic Gain
ACC	TCGA-OR-A5JC-01A-11D-A29H-01	10	134917297	135434551	0.0952	0.1538	Inherited Duplication
ACC	TCGA-OR-A5JC-01A-11D-A29H-01	11	211447	134900469	0.3549	-0.1666	Mosaic Loss
ACC	TCGA-OR-A5JC-01A-11D-A29H-01	13	19523949	115106996	0.3438	-0.2086	Mosaic Loss
ACC	TCGA-OR-A5JC-01A-11D-A29H-01	14	20211644	20943504	0.2179	-0.0285	Mosaic cnLOH
ACC	TCGA-OR-A5JC-01A-11D-A29H-01	14	22791071	42095232	0.2001	-0.0112	Mosaic cnLOH
ACC	TCGA-OR-A5JC-01A-11D-A29H-01	14	42596381	44736406	0.2055	-0.015	Mosaic cnLOH
ACC	TCGA-OR-A5JC-01A-11D-A29H-01	14	44861644	59095161	0.2003	0.0042	Mosaic cnLOH
ACC	TCGA-OR-A5JC-01A-11D-A29H-01	14	59875592	75316614	0.1899	0.0267	Mosaic cnLOH
ACC	TCGA-OR-A5JC-01A-11D-A29H-01	14	75758302	78758796	0.2175	-0.0118	Mosaic cnLOH
ACC	TCGA-OR-A5JC-01A-11D-A29H-01	14	78875971	84993510	0.2136	-0.0291	Mosaic cnLOH
ACC	TCGA-OR-A5JC-01A-11D-A29H-01	14	85668179	86176908	0.2334	-0.0311	Mosaic cnLOH
ACC	TCGA-OR-A5JC-01A-11D-A29H-01	14	86619215	89374479	0.2062	-0.0208	Mosaic cnLOH
ACC	TCGA-OR-A5JC-01A-11D-A29H-01	14	89664502	102932447	0.2125	-0.0176	Mosaic cnLOH
ACC	TCGA-OR-A5JC-01A-11D-A29H-01	14	103603653	107285437	0.2174	0.0304	Mosaic cnLOH
ACC	TCGA-OR-A5JC-01A-11D-A29H-01	15	20071673	102400037	0.1329	0.0975	Mosaic Gain
ACC	TCGA-OR-A5JC-01A-11D-A29H-01	16	86671	90163275	0.1184	0.1133	Mosaic Gain
ACC	TCGA-OR-A5JC-01A-11D-A29H-01	17	6689	591078	0.3497	-0.1119	Mosaic Loss
ACC	TCGA-OR-A5JC-01A-11D-A29H-01	17	1006446	81048659	0.3514	-0.1514	Mosaic Loss
ACC	TCGA-OR-A5JC-01A-11D-A29H-01	18	100949	10090808	0.2475	-0.552	Mosaic Loss
ACC	TCGA-OR-A5JC-01A-11D-A29H-01	18	10200761	78014582	0.2539	-0.5502	Mosaic Loss
ACC	TCGA-OR-A5JC-01A-11D-A29H-01	20	296172	62912463	0.0987	0.1264	Mosaic Gain
ACC	TCGA-OR-A5JC-01A-11D-A29H-01	21	10962411	48084820	0.134	0.0976	Mosaic Gain
ACC	TCGA-OR-A5JC-01A-11D-A29H-01	22	16055171	51175626	0.1953	-0.513	Mosaic Loss
ACC	TCGA-OR-A5JD-01A-11D-A29H-01	1	990417	23712625	0.3259	-0.2249	Mosaic Loss
ACC	TCGA-OR-A5JD-01A-11D-A29H-01	1	24055718	249198692	0.3304	-0.2414	Mosaic Loss
ACC	TCGA-OR-A5JD-01A-11D-A29H-01	2	15703	243048760	0.3297	-0.2267	Mosaic Loss
ACC	TCGA-OR-A5JD-01A-11D-A29H-01	6	451925	170905977	0.3339	-0.2138	Mosaic Loss
ACC	TCGA-OR-A5JD-01A-11D-A29H-01	11	217140	134942626	0.3309	-0.2257	Mosaic Loss
ACC	TCGA-OR-A5JD-01A-11D-A29H-01	14	20426704	107285437	0.3314	-0.2184	Mosaic Loss
ACC	TCGA-OR-A5JD-01A-11D-A29H-01	15	20071673	102305129	0.3292	-0.2301	Mosaic Loss
ACC	TCGA-OR-A5JD-01A-11D-A29H-01	18	100949	78014582	0.3305	-0.2216	Mosaic Loss
ACC	TCGA-OR-A5JD-01A-11D-A29H-01	21	14635153	48084820	0.3329	-0.2147	Mosaic Loss
ACC	TCGA-OR-A5JD-01A-11D-A29H-01	22	16055171	43660607	0.3218	-0.2583	Mosaic Loss
ACC	TCGA-OR-A5JD-01A-11D-A29H-01	22	44079645	50675962	0.3183	-0.233	Mosaic Loss
ACC	TCGA-OR-A5JE-01A-11D-A29H-01	1	15600799	63988484	0.1371	-0.0171	Mosaic cnLOH
ACC	TCGA-OR-A5JE-01A-11D-A29H-01	1	65115812	73232782	0.143	0.0265	Mosaic cnLOH
ACC	TCGA-OR-A5JE-01A-11D-A29H-01	1	145395604	235758570	0.228	0.1719	Mosaic Gain
ACC	TCGA-OR-A5JE-01A-11D-A29H-01	1	236182924	240773283	0.181	0.0902	Mosaic Gain
ACC	TCGA-OR-A5JE-01A-11D-A29H-01	1	241012196	249079882	0.2368	0.1974	Mosaic Gain
ACC	TCGA-OR-A5JE-01A-11D-A29H-01	2	226980411	243048760	0.1044	0.3085	Mosaic Gain
ACC	TCGA-OR-A5JE-01A-11D-A29H-01	3	69244	197808975	0.1373	-0.0082	Mosaic cnLOH
ACC	TCGA-OR-A5JE-01A-11D-A29H-01	4	61981	182754966	0.1378	0.0049	Mosaic cnLOH
ACC	TCGA-OR-A5JE-01A-11D-A29H-01	4	183661901	190860128	0.1371	0.0068	Mosaic cnLOH
ACC	TCGA-OR-A5JE-01A-11D-A29H-01	5	16805287	30401842	0.1441	-0.0146	Mosaic cnLOH
ACC	TCGA-OR-A5JE-01A-11D-A29H-01	6	170111985	170905977	0.0609	0.1895	Inherited Duplication
ACC	TCGA-OR-A5JE-01A-11D-A29H-01	7	44167	159116965	0.2352	-0.1656	Mosaic Loss
ACC	TCGA-OR-A5JE-01A-11D-A29H-01	8	113565	146293414	0.1381	-0.0504	Mosaic Loss
ACC	TCGA-OR-A5JE-01A-11D-A29H-01	9	46587	38771460	0.1395	0.0052	Mosaic cnLOH
ACC	TCGA-OR-A5JE-01A-11D-A29H-01	9	124965702	126796404	0.1254	0.3576	Inherited Duplication
ACC	TCGA-OR-A5JE-01A-11D-A29H-01	9	135648905	138991814	0.1024	0.3079	Mosaic Gain
ACC	TCGA-OR-A5JE-01A-11D-A29H-01	9	139059275	141071475	0.0827	0.2886	Mosaic Gain
ACC	TCGA-OR-A5JE-01A-11D-A29H-01	10	104427	16711012	0.3439	-0.2541	Mosaic Loss
ACC	TCGA-OR-A5JE-01A-11D-A29H-01	10	17029935	20132355	0.3093	-0.1457	Mosaic Loss
ACC	TCGA-OR-A5JE-01A-11D-A29H-01	10	20699146	29554120	0.3432	-0.2637	Mosaic Loss
ACC	TCGA-OR-A5JE-01A-11D-A29H-01	10	29562039	135434551	0.1394	-0.0132	Mosaic cnLOH
ACC	TCGA-OR-A5JE-01A-11D-A29H-01	11	211447	51267672	0.1342	-0.0132	Mosaic cnLOH
ACC	TCGA-OR-A5JE-01A-11D-A29H-01	11	60517887	70790852	0.115	0.0667	Mosaic Gain
ACC	TCGA-OR-A5JE-01A-11D-A29H-01	11	86146001	134903050	0.1331	-0.0161	Mosaic cnLOH
ACC	TCGA-OR-A5JE-01A-11D-A29H-01	13	19523734	114879713	0.3515	-0.2342	Mosaic Loss
ACC	TCGA-OR-A5JE-01A-11D-A29H-01	15	32270448	75384227	0.1391	-0.0117	Mosaic cnLOH
ACC	TCGA-OR-A5JE-01A-11D-A29H-01	15	84784562	102400037	0.1333	-0.0261	Mosaic cnLOH
ACC	TCGA-OR-A5JE-01A-11D-A29H-01	16	86671	31722285	0.1384	-0.067	Mosaic Loss
ACC	TCGA-OR-A5JE-01A-11D-A29H-01	17	27123816	81048659	0.1324	-0.0329	Mosaic cnLOH
ACC	TCGA-OR-A5JE-01A-11D-A29H-01	18	100949	77826306	0.1375	-0.0115	Mosaic cnLOH
ACC	TCGA-OR-A5JE-01A-11D-A29H-01	20	32003944	62253821	0.0987	0.2663	Mosaic Gain
ACC	TCGA-OR-A5JF-01A-11D-A29H-01	1	2024064	20257827	0.3525	-0.1521	Mosaic Loss
ACC	TCGA-OR-A5JF-01A-11D-A29H-01	1	20291950	249198692	0.3582	-0.2051	Mosaic Loss
ACC	TCGA-OR-A5JF-01A-11D-A29H-01	2	15703	243048760	0.359	-0.1874	Mosaic Loss
ACC	TCGA-OR-A5JF-01A-11D-A29H-01	3	69244	197808975	0.3601	-0.1913	Mosaic Loss
ACC	TCGA-OR-A5JF-01A-11D-A29H-01	4	110957343	112728667	0.0957	0.1542	Inherited Duplication
ACC	TCGA-OR-A5JF-01A-11D-A29H-01	4	181113518	190922257	0.3606	-0.1726	Mosaic Loss
ACC	TCGA-OR-A5JF-01A-11D-A29H-01	6	165632	170905977	0.3586	-0.1879	Mosaic Loss
ACC	TCGA-OR-A5JF-01A-11D-A29H-01	8	113565	146293414	0.401	0.0049	Mosaic cnLOH
ACC	TCGA-OR-A5JF-01A-11D-A29H-01	9	140756825	141071475	0.0327	0.221	Inherited Duplication
ACC	TCGA-OR-A5JF-01A-11D-A29H-01	10	104427	135434551	0.1241	0.091	Mosaic Gain
ACC	TCGA-OR-A5JF-01A-11D-A29H-01	11	211447	2849530	0.3323	-0.1535	Mosaic Loss
ACC	TCGA-OR-A5JF-01A-11D-A29H-01	11	2895800	134862196	0.3562	-0.1834	Mosaic Loss
ACC	TCGA-OR-A5JF-01A-11D-A29H-01	12	125329313	133777645	0.35	-0.1933	Mosaic Loss
ACC	TCGA-OR-A5JF-01A-11D-A29H-01	13	19045628	115106996	0.3618	-0.1641	Mosaic Loss
ACC	TCGA-OR-A5JF-01A-11D-A29H-01	14	20211644	107285437	0.358	-0.174	Mosaic Loss
ACC	TCGA-OR-A5JF-01A-11D-A29H-01	15	20071673	102395843	0.3573	-0.185	Mosaic Loss
ACC	TCGA-OR-A5JF-01A-11D-A29H-01	16	5300647	6115495	0.3472	-0.192	Mosaic Loss
ACC	TCGA-OR-A5JF-01A-11D-A29H-01	16	89857964	90163275	0.0742	0.2646	Inherited Duplication
ACC	TCGA-OR-A5JF-01A-11D-A29H-01	17	6689	81048659	0.3529	-0.1817	Mosaic Loss
ACC	TCGA-OR-A5JF-01A-11D-A29H-01	18	100949	78014582	0.3598	-0.1864	Mosaic Loss
ACC	TCGA-OR-A5JF-01A-11D-A29H-01	19	260912	607984	0.0546	0.2833	Inherited Duplication
ACC	TCGA-OR-A5JF-01A-11D-A29H-01	21	10962411	48084820	0.3578	-0.184	Mosaic Loss
ACC	TCGA-OR-A5JF-01A-11D-A29H-01	22	16055171	51219006	0.3519	-0.1746	Mosaic Loss
ACC	TCGA-OR-A5JG-01A-11D-A29H-01	1	761732	71097277	0.4411	0.0384	Mosaic cnLOH
ACC	TCGA-OR-A5JG-01A-11D-A29H-01	1	72134153	249198692	0.438	-0.0011	Mosaic cnLOH
ACC	TCGA-OR-A5JG-01A-11D-A29H-01	2	15703	243048760	0.4372	0.0156	Mosaic cnLOH
ACC	TCGA-OR-A5JG-01A-11D-A29H-01	3	69244	197808975	0.41	-0.1334	Mosaic Loss
ACC	TCGA-OR-A5JG-01A-11D-A29H-01	4	61981	190374703	0.4381	0.0288	Mosaic cnLOH
ACC	TCGA-OR-A5JG-01A-11D-A29H-01	6	190044	170905977	0.4106	-0.1339	Mosaic Loss
ACC	TCGA-OR-A5JG-01A-11D-A29H-01	8	179693	145931914	0.407	-0.1827	Mosaic Loss
ACC	TCGA-OR-A5JG-01A-11D-A29H-01	9	94988945	141071475	0.1265	0.3405	Mosaic Gain
ACC	TCGA-OR-A5JG-01A-11D-A29H-01	10	104427	135434551	0.4089	-0.1351	Mosaic Loss
ACC	TCGA-OR-A5JG-01A-11D-A29H-01	11	211447	134942626	0.3685	-0.333	Mosaic Loss
ACC	TCGA-OR-A5JG-01A-11D-A29H-01	12	161382	505839	0.1349	0.3811	Inherited Duplication
ACC	TCGA-OR-A5JG-01A-11D-A29H-01	12	615386	60947968	0.1262	0.3297	Mosaic Gain
ACC	TCGA-OR-A5JG-01A-11D-A29H-01	13	19523734	115106996	0.421	-0.0667	Mosaic Loss
ACC	TCGA-OR-A5JG-01A-11D-A29H-01	14	38571182	80941974	0.0875	0.2343	Mosaic Gain
ACC	TCGA-OR-A5JG-01A-11D-A29H-01	14	93135455	107285437	0.0811	0.2073	Mosaic Gain
ACC	TCGA-OR-A5JG-01A-11D-A29H-01	15	20071673	24040865	0.429	0.0232	Mosaic cnLOH
ACC	TCGA-OR-A5JG-01A-11D-A29H-01	15	24096906	102061971	0.4376	0.0192	Mosaic cnLOH
ACC	TCGA-OR-A5JG-01A-11D-A29H-01	17	115657	81048659	0.4131	-0.1346	Mosaic Loss
ACC	TCGA-OR-A5JG-01A-11D-A29H-01	18	100949	77818414	0.4078	-0.1546	Mosaic Loss
ACC	TCGA-OR-A5JG-01A-11D-A29H-01	21	14642464	48084820	0.2891	0.3485	Mosaic Gain
ACC	TCGA-OR-A5JG-01A-11D-A29H-01	22	16055171	51134186	0.4083	-0.1402	Mosaic Loss
ACC	TCGA-OR-A5JH-01A-11D-A309-01	1	1812688	249198692	0.1745	-0.1266	Mosaic Loss
ACC	TCGA-OR-A5JH-01A-11D-A309-01	2	15703	243048760	0.1745	-0.1103	Mosaic Loss
ACC	TCGA-OR-A5JH-01A-11D-A309-01	3	69244	52649090	0.1783	-0.1075	Mosaic Loss
ACC	TCGA-OR-A5JH-01A-11D-A309-01	5	181463	180692833	0.1118	0.3269	Mosaic Gain
ACC	TCGA-OR-A5JH-01A-11D-A309-01	6	165632	170896644	0.1771	-0.1019	Mosaic Loss
ACC	TCGA-OR-A5JH-01A-11D-A309-01	10	104427	135434551	0.1752	-0.1079	Mosaic Loss
ACC	TCGA-OR-A5JH-01A-11D-A309-01	11	211447	134942626	0.1728	-0.1078	Mosaic Loss
ACC	TCGA-OR-A5JH-01A-11D-A309-01	12	133662209	133777645	0.0393	-0.0071	Mosaic Subtle
ACC	TCGA-OR-A5JH-01A-11D-A309-01	13	19045628	115106996	0.1769	-0.0705	Mosaic Loss
ACC	TCGA-OR-A5JH-01A-11D-A309-01	14	20211644	107285437	0.1745	-0.1049	Mosaic Loss
ACC	TCGA-OR-A5JH-01A-11D-A309-01	15	20071673	102395843	0.1794	-0.1057	Mosaic Loss
ACC	TCGA-OR-A5JH-01A-11D-A309-01	17	7358000	16791960	0.1755	-0.0872	Mosaic Loss
ACC	TCGA-OR-A5JH-01A-11D-A309-01	18	100949	78014582	0.1734	-0.1008	Mosaic Loss
ACC	TCGA-OR-A5JH-01A-11D-A309-01	21	14736298	48084820	0.1776	-0.0988	Mosaic Loss
ACC	TCGA-OR-A5JH-01A-11D-A309-01	22	16055171	50831053	0.1769	-0.1343	Mosaic Loss
ACC	TCGA-OR-A5JI-01A-11D-A29H-01	2	112496	243048760	0.145	0.0316	Mosaic cnLOH
ACC	TCGA-OR-A5JI-01A-11D-A29H-01	3	69244	197737911	0.1258	0.079	Mosaic Gain
ACC	TCGA-OR-A5JI-01A-11D-A29H-01	6	577820	170905977	0.1254	0.0771	Mosaic Gain
ACC	TCGA-OR-A5JI-01A-11D-A29H-01	7	44167	159116965	0.1232	0.0498	Mosaic cnLOH
ACC	TCGA-OR-A5JI-01A-11D-A29H-01	8	113565	146293414	0.121	0.0326	Mosaic cnLOH
ACC	TCGA-OR-A5JI-01A-11D-A29H-01	9	46587	141071475	0.1244	0.0706	Mosaic Gain
ACC	TCGA-OR-A5JI-01A-11D-A29H-01	10	104427	134801078	0.1232	0.0764	Mosaic Gain
ACC	TCGA-OR-A5JI-01A-11D-A29H-01	10	134917297	135434551	0.1446	0.1288	Inherited Duplication
ACC	TCGA-OR-A5JI-01A-11D-A29H-01	11	211447	134938470	0.3036	-0.1582	Mosaic Loss
ACC	TCGA-OR-A5JI-01A-11D-A29H-01	13	19307316	89474702	0.1982	-0.4355	Mosaic Loss
ACC	TCGA-OR-A5JI-01A-11D-A29H-01	13	90111187	103680517	0.198	-0.4527	Mosaic Loss
ACC	TCGA-OR-A5JI-01A-11D-A29H-01	13	103700866	115106996	0.1886	-0.4351	Mosaic Loss
ACC	TCGA-OR-A5JI-01A-11D-A29H-01	14	20211644	20863811	0.0937	0.1142	Inherited Duplication
ACC	TCGA-OR-A5JI-01A-11D-A29H-01	14	22235890	106098346	0.1254	0.0806	Mosaic Gain
ACC	TCGA-OR-A5JI-01A-11D-A29H-01	17	173906	80119645	0.1218	0.0685	Mosaic Gain
ACC	TCGA-OR-A5JI-01A-11D-A29H-01	17	80571060	81048659	0.1351	0.0493	Mosaic cnLOH
ACC	TCGA-OR-A5JI-01A-11D-A29H-01	18	100949	78014582	0.3077	-0.1552	Mosaic Loss
ACC	TCGA-OR-A5JI-01A-11D-A29H-01	22	16058758	51219006	0.1977	-0.456	Mosaic Loss
ACC	TCGA-OR-A5JJ-01A-11D-A29H-01	1	949608	249198692	0.3767	-0.1915	Mosaic Loss
ACC	TCGA-OR-A5JJ-01A-11D-A29H-01	2	15703	243048760	0.3793	-0.1748	Mosaic Loss
ACC	TCGA-OR-A5JJ-01A-11D-A29H-01	3	69244	192886747	0.3804	-0.1716	Mosaic Loss
ACC	TCGA-OR-A5JJ-01A-11D-A29H-01	3	193187108	197808975	0.37	-0.1831	Mosaic Loss
ACC	TCGA-OR-A5JJ-01A-11D-A29H-01	4	61981	92034092	0.1349	0.5907	Mosaic Gain
ACC	TCGA-OR-A5JJ-01A-11D-A29H-01	4	92114903	190703431	0.3804	-0.1421	Mosaic Loss
ACC	TCGA-OR-A5JJ-01A-11D-A29H-01	5	180553222	180692833	0.0955	0.1699	Inherited Duplication
ACC	TCGA-OR-A5JJ-01A-11D-A29H-01	6	165632	170896644	0.3798	-0.1732	Mosaic Loss
ACC	TCGA-OR-A5JJ-01A-11D-A29H-01	8	113565	8117565	0.3771	-0.1629	Mosaic Loss
ACC	TCGA-OR-A5JJ-01A-11D-A29H-01	8	10274888	49343015	0.3783	-0.1637	Mosaic Loss
ACC	TCGA-OR-A5JJ-01A-11D-A29H-01	9	216124	36023728	0.3816	-0.158	Mosaic Loss
ACC	TCGA-OR-A5JJ-01A-11D-A29H-01	9	36724515	141071475	0.1549	0.6143	Mosaic Gain
ACC	TCGA-OR-A5JJ-01A-11D-A29H-01	10	104427	1327807	0.382	-0.2168	Mosaic Loss
ACC	TCGA-OR-A5JJ-01A-11D-A29H-01	10	1535739	135434551	0.3668	-0.1696	Mosaic Loss
ACC	TCGA-OR-A5JJ-01A-11D-A29H-01	11	211447	134942626	0.3795	-0.1727	Mosaic Loss
ACC	TCGA-OR-A5JJ-01A-11D-A29H-01	13	19212262	115106996	0.3846	-0.1494	Mosaic Loss
ACC	TCGA-OR-A5JJ-01A-11D-A29H-01	15	30971831	36222536	0.3754	-0.151	Mosaic Loss
ACC	TCGA-OR-A5JJ-01A-11D-A29H-01	15	38113390	87937740	0.3781	-0.1803	Mosaic Loss
ACC	TCGA-OR-A5JJ-01A-11D-A29H-01	15	93454382	101634364	0.3769	-0.1856	Mosaic Loss
ACC	TCGA-OR-A5JJ-01A-11D-A29H-01	16	48889294	90163275	0.4464	0.288	Mosaic Gain
ACC	TCGA-OR-A5JJ-01A-11D-A29H-01	17	6689	81048659	0.3721	-0.1832	Mosaic Loss
ACC	TCGA-OR-A5JJ-01A-11D-A29H-01	18	100949	78014582	0.3811	-0.166	Mosaic Loss
ACC	TCGA-OR-A5JJ-01A-11D-A29H-01	20	61795	13004604	0.3747	-0.212	Mosaic Loss
ACC	TCGA-OR-A5JJ-01A-11D-A29H-01	20	13400713	17478869	0.379	-0.198	Mosaic Loss
ACC	TCGA-OR-A5JJ-01A-11D-A29H-01	20	18024223	20730674	0.3722	-0.2307	Mosaic Loss
ACC	TCGA-OR-A5JJ-01A-11D-A29H-01	20	47189231	47833418	0.3552	-0.2498	Mosaic Loss
ACC	TCGA-OR-A5JK-01A-11D-A29H-01	1	1156131	249198692	0.3211	-0.0327	Mosaic cnLOH
ACC	TCGA-OR-A5JK-01A-11D-A29H-01	2	15703	243048760	0.3002	-0.1074	Mosaic Loss
ACC	TCGA-OR-A5JK-01A-11D-A29H-01	3	69244	115423229	0.293	-0.1303	Mosaic Loss
ACC	TCGA-OR-A5JK-01A-11D-A29H-01	3	116583996	184402715	0.2887	-0.1489	Mosaic Loss
ACC	TCGA-OR-A5JK-01A-11D-A29H-01	3	184532028	197793905	0.2897	-0.1451	Mosaic Loss
ACC	TCGA-OR-A5JK-01A-11D-A29H-01	4	182641214	183931994	0.1788	-0.3028	Mosaic Loss
ACC	TCGA-OR-A5JK-01A-11D-A29H-01	4	185173472	186197070	0.084	0.1462	Inherited Duplication
ACC	TCGA-OR-A5JK-01A-11D-A29H-01	5	1427803	21769774	0.2837	-0.1666	Mosaic Loss
ACC	TCGA-OR-A5JK-01A-11D-A29H-01	5	73390580	81546918	0.1352	0.5323	Mosaic Gain
ACC	TCGA-OR-A5JK-01A-11D-A29H-01	5	98636066	105029660	0.2922	-0.1463	Mosaic Loss
ACC	TCGA-OR-A5JK-01A-11D-A29H-01	5	105177173	112318928	0.2948	-0.1292	Mosaic Loss
ACC	TCGA-OR-A5JK-01A-11D-A29H-01	5	113250353	113914542	0.1503	0.5658	Inherited Duplication
ACC	TCGA-OR-A5JK-01A-11D-A29H-01	6	227053	157249978	0.2917	-0.1337	Mosaic Loss
ACC	TCGA-OR-A5JK-01A-11D-A29H-01	6	157432384	170896644	0.289	-0.1163	Mosaic Loss
ACC	TCGA-OR-A5JK-01A-11D-A29H-01	9	192129	131969556	0.2928	-0.1269	Mosaic Loss
ACC	TCGA-OR-A5JK-01A-11D-A29H-01	9	132098528	141071475	0.2851	-0.1228	Mosaic Loss
ACC	TCGA-OR-A5JK-01A-11D-A29H-01	11	249097	134942626	0.3032	-0.0898	Mosaic Loss
ACC	TCGA-OR-A5JK-01A-11D-A29H-01	12	161382	333245	0.0862	0.2289	Inherited Duplication
ACC	TCGA-OR-A5JK-01A-11D-A29H-01	13	20686272	115106996	0.2932	-0.1099	Mosaic Loss
ACC	TCGA-OR-A5JK-01A-11D-A29H-01	14	20211644	107224299	0.2916	-0.1252	Mosaic Loss
ACC	TCGA-OR-A5JK-01A-11D-A29H-01	16	5697395	6362641	0.2768	-0.1873	Mosaic Loss
ACC	TCGA-OR-A5JK-01A-11D-A29H-01	16	6677777	7320915	0.2436	-0.1969	Mosaic Loss
ACC	TCGA-OR-A5JK-01A-11D-A29H-01	16	48202503	52744350	0.2906	-0.166	Mosaic Loss
ACC	TCGA-OR-A5JK-01A-11D-A29H-01	17	463043	81048659	0.2879	-0.124	Mosaic Loss
ACC	TCGA-OR-A5JK-01A-11D-A29H-01	18	100949	78014582	0.2899	-0.1308	Mosaic Loss
ACC	TCGA-OR-A5JK-01A-11D-A29H-01	20	62903729	62912463	0.1035	0.0942	Inherited Duplication
ACC	TCGA-OR-A5JK-01A-11D-A29H-01	21	10962411	48084820	0.383	0.2329	Mosaic Gain
ACC	TCGA-OR-A5JK-01A-11D-A29H-01	22	16055171	51219006	0.286	-0.1301	Mosaic Loss
ACC	TCGA-OR-A5JL-01A-11D-A29H-01	1	3253941	249198692	0.3223	-0.1793	Mosaic Loss
ACC	TCGA-OR-A5JL-01A-11D-A29H-01	2	15703	243048760	0.3264	-0.1729	Mosaic Loss
ACC	TCGA-OR-A5JL-01A-11D-A29H-01	3	69244	152678946	0.3261	-0.1699	Mosaic Loss
ACC	TCGA-OR-A5JL-01A-11D-A29H-01	3	154509115	197808975	0.3272	-0.1832	Mosaic Loss
ACC	TCGA-OR-A5JL-01A-11D-A29H-01	4	61981	445794	0.1244	0.1968	Inherited Duplication
ACC	TCGA-OR-A5JL-01A-11D-A29H-01	8	113565	146293414	0.3231	-0.2208	Mosaic Loss
ACC	TCGA-OR-A5JL-01A-11D-A29H-01	9	46587	141071475	0.3271	-0.1655	Mosaic Loss
ACC	TCGA-OR-A5JL-01A-11D-A29H-01	10	104427	135434551	0.3242	-0.1682	Mosaic Loss
ACC	TCGA-OR-A5JL-01A-11D-A29H-01	11	211447	133823385	0.3261	-0.1673	Mosaic Loss
ACC	TCGA-OR-A5JL-01A-11D-A29H-01	11	134344843	134942626	0.2969	-0.1959	Mosaic Loss
ACC	TCGA-OR-A5JL-01A-11D-A29H-01	12	161382	21333214	0.1261	0.05	Mosaic cnLOH
ACC	TCGA-OR-A5JL-01A-11D-A29H-01	14	93031633	103895909	0.1119	0.478	Mosaic Gain
ACC	TCGA-OR-A5JL-01A-11D-A29H-01	16	1972548	87659661	0.3399	-0.115	Mosaic Loss
ACC	TCGA-OR-A5JL-01A-11D-A29H-01	16	87958562	90163275	0.3084	-0.0997	Mosaic Loss
ACC	TCGA-OR-A5JL-01A-11D-A29H-01	17	6689	81048659	0.3209	-0.1708	Mosaic Loss
ACC	TCGA-OR-A5JL-01A-11D-A29H-01	18	100949	6404501	0.3256	-0.1745	Mosaic Loss
ACC	TCGA-OR-A5JL-01A-11D-A29H-01	18	6567538	78014582	0.3273	-0.1667	Mosaic Loss
ACC	TCGA-OR-A5JL-01A-11D-A29H-01	19	260912	441195	0.2908	-0.0931	Mosaic Loss
ACC	TCGA-OR-A5JL-01A-11D-A29H-01	19	1723570	57515227	0.3159	-0.195	Mosaic Loss
ACC	TCGA-OR-A5JL-01A-11D-A29H-01	19	57835794	59093464	0.322	-0.2427	Mosaic Loss
ACC	TCGA-OR-A5JL-01A-11D-A29H-01	20	61795	62903729	0.3225	-0.1918	Mosaic Loss
ACC	TCGA-OR-A5JL-01A-11D-A29H-01	22	17075353	51140316	0.3147	-0.1656	Mosaic Loss
ACC	TCGA-OR-A5JM-01A-11D-A29H-01	1	119875730	213868299	0.1573	-0.0443	Mosaic cnLOH
ACC	TCGA-OR-A5JM-01A-11D-A29H-01	1	213898438	249198692	0.2442	0.1623	Mosaic Gain
ACC	TCGA-OR-A5JM-01A-11D-A29H-01	2	135392958	139524784	0.155	0.0306	Mosaic cnLOH
ACC	TCGA-OR-A5JM-01A-11D-A29H-01	2	140308150	243048760	0.1589	-0.0038	Mosaic cnLOH
ACC	TCGA-OR-A5JM-01A-11D-A29H-01	3	69244	197808975	0.1601	-0.0077	Mosaic cnLOH
ACC	TCGA-OR-A5JM-01A-11D-A29H-01	4	61981	57627276	0.1582	-0.0262	Mosaic cnLOH
ACC	TCGA-OR-A5JM-01A-11D-A29H-01	4	77188058	77863211	0.1431	-0.0006	Mosaic cnLOH
ACC	TCGA-OR-A5JM-01A-11D-A29H-01	4	131013066	132574732	0.194	0.0809	Inherited Duplication
ACC	TCGA-OR-A5JM-01A-11D-A29H-01	4	133435293	134345272	0.1908	0.0704	Mosaic Gain
ACC	TCGA-OR-A5JM-01A-11D-A29H-01	4	149375177	150000536	0.1715	0.0015	Mosaic cnLOH
ACC	TCGA-OR-A5JM-01A-11D-A29H-01	4	156507173	158520563	0.1678	0.0219	Mosaic cnLOH
ACC	TCGA-OR-A5JM-01A-11D-A29H-01	5	36344	20688435	0.4017	-0.3226	Mosaic Loss
ACC	TCGA-OR-A5JM-01A-11D-A29H-01	5	22119976	179991841	0.1599	-0.0295	Mosaic cnLOH
ACC	TCGA-OR-A5JM-01A-11D-A29H-01	6	85397393	89167772	0.1542	0.031	Mosaic cnLOH
ACC	TCGA-OR-A5JM-01A-11D-A29H-01	6	90916345	94034201	0.161	0.0246	Mosaic cnLOH
ACC	TCGA-OR-A5JM-01A-11D-A29H-01	6	94876830	104557611	0.1539	0.0266	Mosaic cnLOH
ACC	TCGA-OR-A5JM-01A-11D-A29H-01	6	105382415	167406633	0.1401	0.1109	Mosaic Gain
ACC	TCGA-OR-A5JM-01A-11D-A29H-01	6	168557620	170905977	0.0978	0.3833	Mosaic Gain
ACC	TCGA-OR-A5JM-01A-11D-A29H-01	7	44167	76137284	0.1551	-0.0462	Mosaic cnLOH
ACC	TCGA-OR-A5JM-01A-11D-A29H-01	9	39104547	141071475	0.1598	-0.0069	Mosaic cnLOH
ACC	TCGA-OR-A5JM-01A-11D-A29H-01	10	104427	47692945	0.1578	-0.0127	Mosaic cnLOH
ACC	TCGA-OR-A5JM-01A-11D-A29H-01	10	52361844	57319884	0.1653	-0.0013	Mosaic cnLOH
ACC	TCGA-OR-A5JM-01A-11D-A29H-01	10	59113403	64777762	0.1576	0.0885	Mosaic Gain
ACC	TCGA-OR-A5JM-01A-11D-A29H-01	11	211447	134821370	0.1583	-0.0118	Mosaic cnLOH
ACC	TCGA-OR-A5JM-01A-11D-A29H-01	12	34835837	56280892	0.1685	0.0345	Mosaic cnLOH
ACC	TCGA-OR-A5JM-01A-11D-A29H-01	12	57705853	60334109	0.3177	1.0215	Mosaic Gain
ACC	TCGA-OR-A5JM-01A-11D-A29H-01	12	61834749	77502780	0.2946	0.8926	Mosaic Gain
ACC	TCGA-OR-A5JM-01A-11D-A29H-01	12	78225186	78761426	0.1222	0.3959	Inherited Duplication
ACC	TCGA-OR-A5JM-01A-11D-A29H-01	12	80849580	118608280	0.1813	0.15	Mosaic Gain
ACC	TCGA-OR-A5JM-01A-11D-A29H-01	12	123626982	133777645	0.161	-0.0456	Mosaic cnLOH
ACC	TCGA-OR-A5JM-01A-11D-A29H-01	13	19045628	115106996	0.1584	0.0135	Mosaic cnLOH
ACC	TCGA-OR-A5JM-01A-11D-A29H-01	14	20211644	20941413	0.1698	0.0495	Mosaic cnLOH
ACC	TCGA-OR-A5JM-01A-11D-A29H-01	14	26635743	46381820	0.1813	-0.0387	Mosaic cnLOH
ACC	TCGA-OR-A5JM-01A-11D-A29H-01	14	46434585	107285437	0.434	-0.3038	Mosaic Loss
ACC	TCGA-OR-A5JM-01A-11D-A29H-01	15	20071673	102400037	0.4375	-0.32	Mosaic Loss
ACC	TCGA-OR-A5JM-01A-11D-A29H-01	16	1113695	90163275	0.1634	-0.0548	Mosaic Loss
ACC	TCGA-OR-A5JM-01A-11D-A29H-01	17	6689	20923147	0.4308	-0.2667	Mosaic Loss
ACC	TCGA-OR-A5JM-01A-11D-A29H-01	17	45933165	81048659	0.1589	-0.0508	Mosaic Loss
ACC	TCGA-OR-A5JM-01A-11D-A29H-01	18	100949	29186128	0.1645	-0.0166	Mosaic cnLOH
ACC	TCGA-OR-A5JM-01A-11D-A29H-01	18	30388308	32719582	0.117	0.4582	Mosaic Gain
ACC	TCGA-OR-A5JM-01A-11D-A29H-01	18	38953296	76523212	0.4262	-0.2965	Mosaic Loss
ACC	TCGA-OR-A5JM-01A-11D-A29H-01	19	13678320	18689904	0.091	0.2856	Mosaic Gain
ACC	TCGA-OR-A5JM-01A-11D-A29H-01	19	30613592	45377098	0.1603	-0.0348	Mosaic cnLOH
ACC	TCGA-OR-A5JM-01A-11D-A29H-01	20	631117	17629162	0.3389	-0.8189	Mosaic Loss
ACC	TCGA-OR-A5JM-01A-11D-A29H-01	20	19405518	22484364	0.3209	-0.814	Mosaic Loss
ACC	TCGA-OR-A5JM-01A-11D-A29H-01	20	23020003	62912463	0.1549	-0.0466	Mosaic cnLOH
ACC	TCGA-OR-A5JM-01A-11D-A29H-01	21	10962411	27209510	0.4089	-0.2466	Mosaic Loss
ACC	TCGA-OR-A5JM-01A-11D-A29H-01	21	29299378	34192545	0.438	-0.2953	Mosaic Loss
ACC	TCGA-OR-A5JM-01A-11D-A29H-01	21	34910220	48084820	0.4432	-0.3211	Mosaic Loss
ACC	TCGA-OR-A5JM-01A-11D-A29H-01	22	17065079	38387933	0.151	-0.0341	Mosaic cnLOH
ACC	TCGA-OR-A5JM-01A-11D-A29H-01	22	40351438	51219006	0.1577	-0.02	Mosaic cnLOH
ACC	TCGA-OR-A5JO-01A-11D-A29H-01	11	244197	26958009	0.3281	0.0118	Mosaic cnLOH
ACC	TCGA-OR-A5JP-01A-11D-A29H-01	1	949608	16795201	0.315	-0.2736	Mosaic Loss
ACC	TCGA-OR-A5JP-01A-11D-A29H-01	1	17437888	187599618	0.1306	0.0149	Mosaic cnLOH
ACC	TCGA-OR-A5JP-01A-11D-A29H-01	1	188146204	249198692	0.2025	0.19	Mosaic Gain
ACC	TCGA-OR-A5JP-01A-11D-A29H-01	2	212228438	213796420	0.1283	0.0417	Mosaic cnLOH
ACC	TCGA-OR-A5JP-01A-11D-A29H-01	2	236770154	242516292	0.1129	-0.023	Mosaic cnLOH
ACC	TCGA-OR-A5JP-01A-11D-A29H-01	3	73603	197808975	0.3489	-0.2464	Mosaic Loss
ACC	TCGA-OR-A5JP-01A-11D-A29H-01	4	61981	17591899	0.1984	0.1633	Mosaic Gain
ACC	TCGA-OR-A5JP-01A-11D-A29H-01	4	17668504	190930894	0.139	0.0364	Mosaic cnLOH
ACC	TCGA-OR-A5JP-01A-11D-A29H-01	5	36344	180692833	0.1331	0.0028	Mosaic cnLOH
ACC	TCGA-OR-A5JP-01A-11D-A29H-01	6	165632	8357513	0.1487	-0.2671	Mosaic Loss
ACC	TCGA-OR-A5JP-01A-11D-A29H-01	6	8483819	16090974	0.2129	-0.0829	Mosaic Loss
ACC	TCGA-OR-A5JP-01A-11D-A29H-01	6	21030811	44281884	0.2208	-0.0358	Mosaic cnLOH
ACC	TCGA-OR-A5JP-01A-11D-A29H-01	6	44472854	170905977	0.1441	0.0359	Mosaic cnLOH
ACC	TCGA-OR-A5JP-01A-11D-A29H-01	7	44167	3232216	0.0921	-0.1544	Mosaic Loss
ACC	TCGA-OR-A5JP-01A-11D-A29H-01	7	8240603	11507986	0.0985	-0.1055	Mosaic Loss
ACC	TCGA-OR-A5JP-01A-11D-A29H-01	7	13230998	16619635	0.1063	-0.0649	Mosaic Loss
ACC	TCGA-OR-A5JP-01A-11D-A29H-01	7	21228873	27174316	0.0986	-0.1095	Mosaic Loss
ACC	TCGA-OR-A5JP-01A-11D-A29H-01	7	28550394	31949763	0.1001	-0.1466	Mosaic Loss
ACC	TCGA-OR-A5JP-01A-11D-A29H-01	7	33067130	36176573	0.0866	-0.1232	Mosaic Loss
ACC	TCGA-OR-A5JP-01A-11D-A29H-01	7	39311211	51653846	0.0944	-0.1209	Mosaic Loss
ACC	TCGA-OR-A5JP-01A-11D-A29H-01	7	57451640	159116965	0.1268	-0.007	Mosaic cnLOH
ACC	TCGA-OR-A5JP-01A-11D-A29H-01	8	113565	211877	0.0831	0.5111	Inherited Duplication
ACC	TCGA-OR-A5JP-01A-11D-A29H-01	9	307197	117699786	0.2106	-0.1061	Mosaic Loss
ACC	TCGA-OR-A5JP-01A-11D-A29H-01	9	119248059	119994615	0.1136	-0.0088	Mosaic cnLOH
ACC	TCGA-OR-A5JP-01A-11D-A29H-01	9	139427066	141071475	0.2823	-0.3071	Mosaic Loss
ACC	TCGA-OR-A5JP-01A-11D-A29H-01	10	104427	35473485	0.1242	0.0019	Mosaic cnLOH
ACC	TCGA-OR-A5JP-01A-11D-A29H-01	10	39050890	49550128	0.1179	0.0437	Mosaic cnLOH
ACC	TCGA-OR-A5JP-01A-11D-A29H-01	11	211447	99489374	0.131	0.0266	Mosaic cnLOH
ACC	TCGA-OR-A5JP-01A-11D-A29H-01	11	99600287	134585056	0.3361	-0.2547	Mosaic Loss
ACC	TCGA-OR-A5JP-01A-11D-A29H-01	13	19549527	115106996	0.3523	-0.2245	Mosaic Loss
ACC	TCGA-OR-A5JP-01A-11D-A29H-01	15	23916629	40435116	0.1384	0.0225	Mosaic cnLOH
ACC	TCGA-OR-A5JP-01A-11D-A29H-01	15	71410495	102400037	0.1343	0.0039	Mosaic cnLOH
ACC	TCGA-OR-A5JP-01A-11D-A29H-01	16	86671	90163275	0.1284	-0.0164	Mosaic cnLOH
ACC	TCGA-OR-A5JP-01A-11D-A29H-01	17	6689	18215080	0.1709	-0.2358	Mosaic Loss
ACC	TCGA-OR-A5JP-01A-11D-A29H-01	17	18565423	48580126	0.2943	-0.3346	Mosaic Loss
ACC	TCGA-OR-A5JP-01A-11D-A29H-01	19	4823689	32583876	0.0914	0.303	Mosaic Gain
ACC	TCGA-OR-A5JP-01A-11D-A29H-01	19	36690874	44982564	0.0898	0.3505	Mosaic Gain
ACC	TCGA-OR-A5JP-01A-11D-A29H-01	19	57198749	59093464	0.106	0.3019	Inherited Duplication
ACC	TCGA-OR-A5JP-01A-11D-A29H-01	20	61795	60680278	0.128	-0.0396	Mosaic cnLOH
ACC	TCGA-OR-A5JP-01A-11D-A29H-01	21	34910220	48084820	0.1286	-0.0079	Mosaic cnLOH
ACC	TCGA-OR-A5JP-01A-11D-A29H-01	22	16055171	19123075	0.3248	-0.2704	Mosaic Loss
ACC	TCGA-OR-A5JP-01A-11D-A29H-01	22	19310812	37083494	0.3184	-0.2882	Mosaic Loss
ACC	TCGA-OR-A5JP-01A-11D-A29H-01	22	37713682	50902390	0.3172	-0.264	Mosaic Loss
ACC	TCGA-OR-A5JQ-01A-11D-A29H-01	1	949608	19121756	0.296	-0.1683	Mosaic Loss
ACC	TCGA-OR-A5JQ-01A-11D-A29H-01	1	19839139	249198692	0.3016	-0.1866	Mosaic Loss
ACC	TCGA-OR-A5JQ-01A-11D-A29H-01	2	15703	243048760	0.3019	-0.1738	Mosaic Loss
ACC	TCGA-OR-A5JQ-01A-11D-A29H-01	4	182171041	182828390	0.2588	-0.0533	Mosaic Loss
ACC	TCGA-OR-A5JQ-01A-11D-A29H-01	6	174769	170905977	0.3045	-0.171	Mosaic Loss
ACC	TCGA-OR-A5JQ-01A-11D-A29H-01	10	252693	135434551	0.3026	-0.1705	Mosaic Loss
ACC	TCGA-OR-A5JQ-01A-11D-A29H-01	11	211447	121328954	0.3014	-0.1715	Mosaic Loss
ACC	TCGA-OR-A5JQ-01A-11D-A29H-01	11	121567897	134933972	0.2996	-0.1924	Mosaic Loss
ACC	TCGA-OR-A5JQ-01A-11D-A29H-01	13	20569878	115106996	0.2787	-0.2447	Mosaic Loss
ACC	TCGA-OR-A5JQ-01A-11D-A29H-01	14	20211644	107285437	0.2999	-0.1658	Mosaic Loss
ACC	TCGA-OR-A5JQ-01A-11D-A29H-01	15	20071673	102350597	0.3006	-0.1745	Mosaic Loss
ACC	TCGA-OR-A5JQ-01A-11D-A29H-01	18	160887	78002239	0.3014	-0.1767	Mosaic Loss
ACC	TCGA-OR-A5JQ-01A-11D-A29H-01	21	15463956	48084820	0.2996	-0.1758	Mosaic Loss
ACC	TCGA-OR-A5JQ-01A-11D-A29H-01	22	16055171	51134186	0.2917	-0.2013	Mosaic Loss
ACC	TCGA-OR-A5JR-01A-11D-A29H-01	1	761732	249198692	0.3594	-0.1691	Mosaic Loss
ACC	TCGA-OR-A5JR-01A-11D-A29H-01	2	15703	243048760	0.3639	-0.1494	Mosaic Loss
ACC	TCGA-OR-A5JR-01A-11D-A29H-01	3	69244	197289224	0.1331	0.1319	Mosaic Gain
ACC	TCGA-OR-A5JR-01A-11D-A29H-01	5	179801752	180079230	0.3376	-0.0681	Mosaic Loss
ACC	TCGA-OR-A5JR-01A-11D-A29H-01	6	174769	162731343	0.3639	-0.1461	Mosaic Loss
ACC	TCGA-OR-A5JR-01A-11D-A29H-01	6	163036223	170905977	0.358	-0.1437	Mosaic Loss
ACC	TCGA-OR-A5JR-01A-11D-A29H-01	7	3190588	4242376	0.1301	0.0221	Mosaic cnLOH
ACC	TCGA-OR-A5JR-01A-11D-A29H-01	9	277989	141071475	0.3629	-0.1442	Mosaic Loss
ACC	TCGA-OR-A5JR-01A-11D-A29H-01	10	104427	135434551	0.3601	-0.1505	Mosaic Loss
ACC	TCGA-OR-A5JR-01A-11D-A29H-01	11	211447	134942626	0.3602	-0.1527	Mosaic Loss
ACC	TCGA-OR-A5JR-01A-11D-A29H-01	13	19045628	115106996	0.3668	-0.1218	Mosaic Loss
ACC	TCGA-OR-A5JR-01A-11D-A29H-01	14	20211644	107285437	0.363	-0.1452	Mosaic Loss
ACC	TCGA-OR-A5JR-01A-11D-A29H-01	15	20071673	102364660	0.358	-0.1618	Mosaic Loss
ACC	TCGA-OR-A5JR-01A-11D-A29H-01	17	6888	81048659	0.3554	-0.1629	Mosaic Loss
ACC	TCGA-OR-A5JR-01A-11D-A29H-01	18	100949	77982107	0.3628	-0.1511	Mosaic Loss
ACC	TCGA-OR-A5JR-01A-11D-A29H-01	19	1376723	58798300	0.1196	0.0292	Mosaic cnLOH
ACC	TCGA-OR-A5JR-01A-11D-A29H-01	20	1451628	3020553	0.1119	0.1035	Inherited Duplication
ACC	TCGA-OR-A5JR-01A-11D-A29H-01	20	62612398	62912463	0.0738	0.1987	Inherited Duplication
ACC	TCGA-OR-A5JR-01A-11D-A29H-01	21	10962411	48084820	0.3619	-0.1509	Mosaic Loss
ACC	TCGA-OR-A5JR-01A-11D-A29H-01	22	16055171	35261397	0.2636	-0.5656	Mosaic Loss
ACC	TCGA-OR-A5JR-01A-11D-A29H-01	22	35344317	51219006	0.2587	-0.5412	Mosaic Loss
ACC	TCGA-OR-A5JS-01A-11D-A29H-01	1	1158631	144879981	0.3805	-0.3324	Mosaic Loss
ACC	TCGA-OR-A5JS-01A-11D-A29H-01	2	227201	243048760	0.1474	-0.0548	Mosaic Loss
ACC	TCGA-OR-A5JS-01A-11D-A29H-01	3	69244	197808975	0.1541	0.1401	Mosaic Gain
ACC	TCGA-OR-A5JS-01A-11D-A29H-01	4	61981	182280270	0.1539	-0.0183	Mosaic cnLOH
ACC	TCGA-OR-A5JS-01A-11D-A29H-01	4	182292227	190930894	0.277	-0.7041	Mosaic Loss
ACC	TCGA-OR-A5JS-01A-11D-A29H-01	5	36344	70780220	0.413	0.1864	Mosaic Gain
ACC	TCGA-OR-A5JS-01A-11D-A29H-01	5	77784738	101687035	0.3988	-0.0222	Mosaic cnLOH
ACC	TCGA-OR-A5JS-01A-11D-A29H-01	5	102690633	159609114	0.375	-0.2603	Mosaic Loss
ACC	TCGA-OR-A5JS-01A-11D-A29H-01	5	160652441	180692833	0.2814	0.5824	Mosaic Gain
ACC	TCGA-OR-A5JS-01A-11D-A29H-01	6	57329886	58040962	0.1282	-0.0293	Mosaic cnLOH
ACC	TCGA-OR-A5JS-01A-11D-A29H-01	6	62242118	119628788	0.1039	0.0568	Mosaic Gain
ACC	TCGA-OR-A5JS-01A-11D-A29H-01	6	120966623	126175185	0.1018	0.0499	Mosaic cnLOH
ACC	TCGA-OR-A5JS-01A-11D-A29H-01	6	128718336	162237644	0.1023	0.0246	Mosaic cnLOH
ACC	TCGA-OR-A5JS-01A-11D-A29H-01	6	163430237	170905977	0.1058	0.0217	Mosaic cnLOH
ACC	TCGA-OR-A5JS-01A-11D-A29H-01	9	250453	38994130	0.3825	-0.3376	Mosaic Loss
ACC	TCGA-OR-A5JS-01A-11D-A29H-01	10	294145	135434551	0.1468	-0.0517	Mosaic Loss
ACC	TCGA-OR-A5JS-01A-11D-A29H-01	11	211447	307036	0.0363	0.1827	Inherited Duplication
ACC	TCGA-OR-A5JS-01A-11D-A29H-01	11	48891877	133253528	0.1029	0.0152	Mosaic cnLOH
ACC	TCGA-OR-A5JS-01A-11D-A29H-01	13	19226222	114953031	0.3836	-0.3183	Mosaic Loss
ACC	TCGA-OR-A5JS-01A-11D-A29H-01	15	98678524	102400037	0.1696	0.4803	Mosaic Gain
ACC	TCGA-OR-A5JS-01A-11D-A29H-01	17	229223	5424042	0.3803	-0.3207	Mosaic Loss
ACC	TCGA-OR-A5JS-01A-11D-A29H-01	17	5838697	6158885	0.3188	-0.133	Mosaic Loss
ACC	TCGA-OR-A5JS-01A-11D-A29H-01	17	10698734	11434764	0.372	-0.2927	Mosaic Loss
ACC	TCGA-OR-A5JS-01A-11D-A29H-01	17	14298828	14766327	0.3735	-0.3175	Mosaic Loss
ACC	TCGA-OR-A5JS-01A-11D-A29H-01	17	21186360	36032423	0.3746	-0.3438	Mosaic Loss
ACC	TCGA-OR-A5JS-01A-11D-A29H-01	17	36592353	42921596	0.3783	-0.3239	Mosaic Loss
ACC	TCGA-OR-A5JS-01A-11D-A29H-01	17	47533572	81048659	0.3687	-0.3449	Mosaic Loss
ACC	TCGA-OR-A5JS-01A-11D-A29H-01	18	100949	77390921	0.3811	-0.3449	Mosaic Loss
ACC	TCGA-OR-A5JS-01A-11D-A29H-01	20	102181	62912463	0.407	-0.136	Mosaic Loss
ACC	TCGA-OR-A5JT-01A-11D-A29H-01	1	1041700	249198692	0.3982	-0.1639	Mosaic Loss
ACC	TCGA-OR-A5JT-01A-11D-A29H-01	2	15703	243048760	0.3996	-0.1512	Mosaic Loss
ACC	TCGA-OR-A5JT-01A-11D-A29H-01	3	69244	197808975	0.4013	-0.1454	Mosaic Loss
ACC	TCGA-OR-A5JT-01A-11D-A29H-01	4	61981	104407	0.1313	1.0134	Inherited Duplication
ACC	TCGA-OR-A5JT-01A-11D-A29H-01	6	165632	170905977	0.402	-0.149	Mosaic Loss
ACC	TCGA-OR-A5JT-01A-11D-A29H-01	7	44167	1225076	0.1698	0.1287	Inherited Duplication
ACC	TCGA-OR-A5JT-01A-11D-A29H-01	7	1806723	159116965	0.1489	0.1464	Mosaic Gain
ACC	TCGA-OR-A5JT-01A-11D-A29H-01	8	4707968	6142076	0.1499	0.1942	Inherited Duplication
ACC	TCGA-OR-A5JT-01A-11D-A29H-01	9	216124	141071475	0.3808	-0.2463	Mosaic Loss
ACC	TCGA-OR-A5JT-01A-11D-A29H-01	10	104427	135434551	0.399	-0.1437	Mosaic Loss
ACC	TCGA-OR-A5JT-01A-11D-A29H-01	11	211447	134752714	0.4004	-0.1482	Mosaic Loss
ACC	TCGA-OR-A5JT-01A-11D-A29H-01	13	19215674	115106996	0.4024	-0.1309	Mosaic Loss
ACC	TCGA-OR-A5JT-01A-11D-A29H-01	14	20211644	107285437	0.3983	-0.1544	Mosaic Loss
ACC	TCGA-OR-A5JT-01A-11D-A29H-01	15	20071673	102400037	0.3965	-0.1554	Mosaic Loss
ACC	TCGA-OR-A5JT-01A-11D-A29H-01	17	221026	71252165	0.3948	-0.1501	Mosaic Loss
ACC	TCGA-OR-A5JT-01A-11D-A29H-01	17	71429776	81048659	0.3854	-0.1561	Mosaic Loss
ACC	TCGA-OR-A5JT-01A-11D-A29H-01	18	100949	23583315	0.3104	-0.6246	Mosaic Loss
ACC	TCGA-OR-A5JT-01A-11D-A29H-01	18	23794220	78014582	0.3132	-0.6129	Mosaic Loss
ACC	TCGA-OR-A5JT-01A-11D-A29H-01	19	260912	59093464	0.3906	-0.1827	Mosaic Loss
ACC	TCGA-OR-A5JT-01A-11D-A29H-01	21	10962411	48084820	0.3998	-0.144	Mosaic Loss
ACC	TCGA-OR-A5JT-01A-11D-A29H-01	22	16055171	51156666	0.3882	-0.1763	Mosaic Loss
ACC	TCGA-OR-A5JU-01A-11D-A309-01	1	1129672	56785356	0.099	-0.0263	Mosaic Subtle
ACC	TCGA-OR-A5JU-01A-11D-A309-01	2	88591002	149093648	0.0902	0.1734	Mosaic Gain
ACC	TCGA-OR-A5JU-01A-11D-A309-01	2	160051067	240972120	0.1218	0.1318	Mosaic Gain
ACC	TCGA-OR-A5JU-01A-11D-A309-01	9	218183	38738620	0.0987	0.0712	Mosaic Gain
ACC	TCGA-OR-A5JU-01A-11D-A309-01	22	33210005	35688623	0.0789	-0.1216	Mosaic Loss
ACC	TCGA-OR-A5JV-01A-11D-A29H-01	1	1333436	249198692	0.2555	-0.0344	Mosaic cnLOH
ACC	TCGA-OR-A5JV-01A-11D-A29H-01	2	15703	243048760	0.2338	-0.0853	Mosaic Loss
ACC	TCGA-OR-A5JV-01A-11D-A29H-01	3	69244	947955	0.1155	0.143	Inherited Duplication
ACC	TCGA-OR-A5JV-01A-11D-A29H-01	3	1288363	197281338	0.1022	0.0919	Mosaic Gain
ACC	TCGA-OR-A5JV-01A-11D-A29H-01	4	182386531	182918786	0.1319	-0.1566	Mosaic Loss
ACC	TCGA-OR-A5JV-01A-11D-A29H-01	5	180361266	180692833	0.0837	0.0927	Inherited Duplication
ACC	TCGA-OR-A5JV-01A-11D-A29H-01	6	165632	170905977	0.2345	-0.0818	Mosaic Loss
ACC	TCGA-OR-A5JV-01A-11D-A29H-01	9	221874	141071475	0.2591	-0.0139	Mosaic cnLOH
ACC	TCGA-OR-A5JV-01A-11D-A29H-01	10	104427	135434551	0.2324	-0.0871	Mosaic Loss
ACC	TCGA-OR-A5JV-01A-11D-A29H-01	11	211447	134942626	0.2338	-0.0902	Mosaic Loss
ACC	TCGA-OR-A5JV-01A-11D-A29H-01	13	19306186	115106996	0.2343	-0.0561	Mosaic Loss
ACC	TCGA-OR-A5JV-01A-11D-A29H-01	14	20211644	107285437	0.2333	-0.0816	Mosaic Loss
ACC	TCGA-OR-A5JV-01A-11D-A29H-01	15	20071673	102094078	0.2332	-0.0921	Mosaic Loss
ACC	TCGA-OR-A5JV-01A-11D-A29H-01	16	31845697	90163275	0.1008	0.0697	Mosaic Gain
ACC	TCGA-OR-A5JV-01A-11D-A29H-01	17	6689	2792530	0.2363	-0.0625	Mosaic Loss
ACC	TCGA-OR-A5JV-01A-11D-A29H-01	17	2899292	81048659	0.2311	-0.0986	Mosaic Loss
ACC	TCGA-OR-A5JV-01A-11D-A29H-01	18	100949	77634234	0.235	-0.0837	Mosaic Loss
ACC	TCGA-OR-A5JV-01A-11D-A29H-01	19	1364306	6919624	0.2198	-0.1275	Mosaic Loss
ACC	TCGA-OR-A5JV-01A-11D-A29H-01	19	15621180	45681134	0.1003	0.0435	Mosaic cnLOH
ACC	TCGA-OR-A5JV-01A-11D-A29H-01	19	53582131	59093239	0.2235	-0.113	Mosaic Loss
ACC	TCGA-OR-A5JV-01A-11D-A29H-01	21	10962411	48030465	0.2445	-0.0615	Mosaic Loss
ACC	TCGA-OR-A5JV-01A-11D-A29H-01	22	17467474	48662538	0.1449	-0.3272	Mosaic Loss
ACC	TCGA-OR-A5JV-01A-11D-A29H-01	22	48742097	51219006	0.1437	-0.3006	Mosaic Loss
ACC	TCGA-OR-A5JW-01A-11D-A29H-01	1	1158631	249198692	0.3585	-0.2676	Mosaic Loss
ACC	TCGA-OR-A5JW-01A-11D-A29H-01	2	15703	243048760	0.3615	-0.2466	Mosaic Loss
ACC	TCGA-OR-A5JW-01A-11D-A29H-01	3	69244	197534959	0.3607	-0.2451	Mosaic Loss
ACC	TCGA-OR-A5JW-01A-11D-A29H-01	4	182170424	182552940	0.3704	-0.2323	Mosaic Loss
ACC	TCGA-OR-A5JW-01A-11D-A29H-01	5	1374886	25812208	0.4271	0.1918	Mosaic Gain
ACC	TCGA-OR-A5JW-01A-11D-A29H-01	5	26738112	29849682	0.4361	0.3374	Mosaic Gain
ACC	TCGA-OR-A5JW-01A-11D-A29H-01	5	30115028	40078936	0.1652	0.4504	Mosaic Gain
ACC	TCGA-OR-A5JW-01A-11D-A29H-01	5	49646456	180692833	0.1485	0.4969	Mosaic Gain
ACC	TCGA-OR-A5JW-01A-11D-A29H-01	8	113565	146293414	0.3578	-0.2877	Mosaic Loss
ACC	TCGA-OR-A5JW-01A-11D-A29H-01	9	46587	141071475	0.4398	0.2078	Mosaic Gain
ACC	TCGA-OR-A5JW-01A-11D-A29H-01	11	678561	134933972	0.3594	-0.2523	Mosaic Loss
ACC	TCGA-OR-A5JW-01A-11D-A29H-01	13	19215674	115106996	0.3674	-0.2126	Mosaic Loss
ACC	TCGA-OR-A5JW-01A-11D-A29H-01	14	20211644	105690092	0.4406	0.2116	Mosaic Gain
ACC	TCGA-OR-A5JW-01A-11D-A29H-01	17	257557	81048659	0.3549	-0.2611	Mosaic Loss
ACC	TCGA-OR-A5JW-01A-11D-A29H-01	18	100949	77957325	0.3617	-0.2451	Mosaic Loss
ACC	TCGA-OR-A5JW-01A-11D-A29H-01	22	17246329	50902231	0.3543	-0.2871	Mosaic Loss
ACC	TCGA-OR-A5JX-01A-11D-A29H-01	1	2061969	249198692	0.4044	-0.3005	Mosaic Loss
ACC	TCGA-OR-A5JX-01A-11D-A29H-01	2	15703	243048760	0.4052	-0.2803	Mosaic Loss
ACC	TCGA-OR-A5JX-01A-11D-A29H-01	3	69244	116041338	0.1546	0.0397	Mosaic cnLOH
ACC	TCGA-OR-A5JX-01A-11D-A29H-01	3	116811193	197808975	0.1531	0.0192	Mosaic cnLOH
ACC	TCGA-OR-A5JX-01A-11D-A29H-01	4	61981	190930894	0.1545	0.0463	Mosaic cnLOH
ACC	TCGA-OR-A5JX-01A-11D-A29H-01	5	36344	31928290	0.3562	-0.2117	Mosaic Loss
ACC	TCGA-OR-A5JX-01A-11D-A29H-01	5	32989759	35640858	0.2367	-0.1847	Mosaic Loss
ACC	TCGA-OR-A5JX-01A-11D-A29H-01	5	39988952	43600087	0.3941	-0.2581	Mosaic Loss
ACC	TCGA-OR-A5JX-01A-11D-A29H-01	5	52179458	61227527	0.1048	0.4209	Mosaic Gain
ACC	TCGA-OR-A5JX-01A-11D-A29H-01	5	63728494	67976351	0.104	0.4253	Mosaic Gain
ACC	TCGA-OR-A5JX-01A-11D-A29H-01	5	72660100	75474921	0.1038	0.4024	Mosaic Gain
ACC	TCGA-OR-A5JX-01A-11D-A29H-01	5	76752250	97447980	0.1074	0.4761	Mosaic Gain
ACC	TCGA-OR-A5JX-01A-11D-A29H-01	5	100506998	150789173	0.1083	0.4481	Mosaic Gain
ACC	TCGA-OR-A5JX-01A-11D-A29H-01	5	151937593	155605432	0.1009	0.4304	Mosaic Gain
ACC	TCGA-OR-A5JX-01A-11D-A29H-01	5	157251841	174640863	0.1046	0.4268	Mosaic Gain
ACC	TCGA-OR-A5JX-01A-11D-A29H-01	5	175215545	180692833	0.0863	0.3878	Mosaic Gain
ACC	TCGA-OR-A5JX-01A-11D-A29H-01	6	165632	170905977	0.154	0.03	Mosaic cnLOH
ACC	TCGA-OR-A5JX-01A-11D-A29H-01	7	120715154	120855779	0.1398	0.1386	Inherited Duplication
ACC	TCGA-OR-A5JX-01A-11D-A29H-01	9	368128	140629940	0.1526	0.0292	Mosaic cnLOH
ACC	TCGA-OR-A5JX-01A-11D-A29H-01	11	54858308	134547554	0.1529	0.0205	Mosaic cnLOH
ACC	TCGA-OR-A5JX-01A-11D-A29H-01	13	19494986	115106996	0.1553	0.0568	Mosaic Gain
ACC	TCGA-OR-A5JX-01A-11D-A29H-01	14	20211644	63522662	0.1576	0.0444	Mosaic cnLOH
ACC	TCGA-OR-A5JX-01A-11D-A29H-01	14	64354419	67734876	0.144	0.0108	Mosaic cnLOH
ACC	TCGA-OR-A5JX-01A-11D-A29H-01	14	68832814	76816746	0.1448	0.0166	Mosaic cnLOH
ACC	TCGA-OR-A5JX-01A-11D-A29H-01	14	84380082	86443261	0.1586	0.0693	Mosaic Gain
ACC	TCGA-OR-A5JX-01A-11D-A29H-01	14	97191619	97833981	0.1563	0.0161	Mosaic cnLOH
ACC	TCGA-OR-A5JX-01A-11D-A29H-01	15	50938978	51590011	0.2458	0.1558	Inherited Duplication
ACC	TCGA-OR-A5JX-01A-11D-A29H-01	15	53379442	56090609	0.2288	0.1957	Mosaic Gain
ACC	TCGA-OR-A5JX-01A-11D-A29H-01	15	60140279	60489830	0.2306	0.221	Inherited Duplication
ACC	TCGA-OR-A5JX-01A-11D-A29H-01	15	60587013	102400037	0.2345	0.2269	Mosaic Gain
ACC	TCGA-OR-A5JX-01A-11D-A29H-01	16	7627947	8958908	0.1115	0.4292	Inherited Duplication
ACC	TCGA-OR-A5JX-01A-11D-A29H-01	17	6689	81048659	0.15	0.0166	Mosaic cnLOH
ACC	TCGA-OR-A5JX-01A-11D-A29H-01	18	100949	7389228	0.2983	-0.7308	Mosaic Loss
ACC	TCGA-OR-A5JX-01A-11D-A29H-01	18	7466110	78014582	0.3048	-0.7248	Mosaic Loss
ACC	TCGA-OR-A5JX-01A-11D-A29H-01	21	14736298	48084820	0.2406	0.2656	Mosaic Gain
ACC	TCGA-OR-A5JX-01A-11D-A29H-01	22	16055171	29185113	0.2991	-0.7336	Mosaic Loss
ACC	TCGA-OR-A5JX-01A-11D-A29H-01	22	29491706	51219006	0.2969	-0.7273	Mosaic Loss
ACC	TCGA-OR-A5JY-01A-31D-A29H-01	1	1297422	94347446	0.1403	-0.1404	Mosaic Loss
ACC	TCGA-OR-A5JY-01A-31D-A29H-01	1	177546934	178510497	0.0833	-0.1142	Mosaic Loss
ACC	TCGA-OR-A5JY-01A-31D-A29H-01	1	180182361	182973024	0.2311	0.2102	Mosaic Gain
ACC	TCGA-OR-A5JY-01A-31D-A29H-01	1	190940627	194405611	0.2369	0.2896	Mosaic Gain
ACC	TCGA-OR-A5JY-01A-31D-A29H-01	1	197555860	198961568	0.2636	0.3686	Inherited Duplication
ACC	TCGA-OR-A5JY-01A-31D-A29H-01	1	246829616	249198692	0.1009	-0.3057	Mosaic Loss
ACC	TCGA-OR-A5JY-01A-31D-A29H-01	2	15703	34048462	0.118	0.2129	Mosaic Gain
ACC	TCGA-OR-A5JY-01A-31D-A29H-01	2	37048522	37984711	0.1058	-0.0731	Mosaic Loss
ACC	TCGA-OR-A5JY-01A-31D-A29H-01	2	38517515	42667257	0.128	-0.0945	Mosaic Loss
ACC	TCGA-OR-A5JY-01A-31D-A29H-01	2	43412033	44347935	0.1683	0.3324	Inherited Duplication
ACC	TCGA-OR-A5JY-01A-31D-A29H-01	2	47111645	51040685	0.1106	0.2125	Mosaic Gain
ACC	TCGA-OR-A5JY-01A-31D-A29H-01	2	60902165	64293274	0.1286	-0.2134	Mosaic Loss
ACC	TCGA-OR-A5JY-01A-31D-A29H-01	2	70173327	95341388	0.1501	-0.1132	Mosaic Loss
ACC	TCGA-OR-A5JY-01A-31D-A29H-01	2	108946178	185198135	0.144	-0.1306	Mosaic Loss
ACC	TCGA-OR-A5JY-01A-31D-A29H-01	2	205815842	206496702	0.1015	0.1954	Inherited Duplication
ACC	TCGA-OR-A5JY-01A-31D-A29H-01	2	207091609	241834654	0.1192	0.1572	Mosaic Gain
ACC	TCGA-OR-A5JY-01A-31D-A29H-01	2	242077685	243048760	0.1098	0.1455	Inherited Duplication
ACC	TCGA-OR-A5JY-01A-31D-A29H-01	3	69244	9010224	0.1982	-0.235	Mosaic Loss
ACC	TCGA-OR-A5JY-01A-31D-A29H-01	3	17134357	72164117	0.1414	-0.1354	Mosaic Loss
ACC	TCGA-OR-A5JY-01A-31D-A29H-01	3	74095484	78250472	0.1175	-0.0449	Mosaic cnLOH
ACC	TCGA-OR-A5JY-01A-31D-A29H-01	3	79731173	81108432	0.0703	-0.0836	Mosaic Loss
ACC	TCGA-OR-A5JY-01A-31D-A29H-01	3	86228831	104721564	0.1055	-0.154	Mosaic Loss
ACC	TCGA-OR-A5JY-01A-31D-A29H-01	3	105907607	158613381	0.1119	-0.2304	Mosaic Loss
ACC	TCGA-OR-A5JY-01A-31D-A29H-01	3	158671108	197808975	0.2161	0.0169	Mosaic cnLOH
ACC	TCGA-OR-A5JY-01A-31D-A29H-01	4	61981	46358331	0.3691	-0.0587	Mosaic Loss
ACC	TCGA-OR-A5JY-01A-31D-A29H-01	4	47350872	52821319	0.0961	0.2741	Mosaic Gain
ACC	TCGA-OR-A5JY-01A-31D-A29H-01	4	71063964	79914339	0.1982	0.4493	Mosaic Gain
ACC	TCGA-OR-A5JY-01A-31D-A29H-01	4	81154975	110872559	0.4162	-0.1044	Mosaic Loss
ACC	TCGA-OR-A5JY-01A-31D-A29H-01	4	112120658	190930894	0.404	-0.2423	Mosaic Loss
ACC	TCGA-OR-A5JY-01A-31D-A29H-01	5	36344	480948	0.1802	0.5657	Inherited Duplication
ACC	TCGA-OR-A5JY-01A-31D-A29H-01	5	619333	17185433	0.1135	0.5238	Mosaic Gain
ACC	TCGA-OR-A5JY-01A-31D-A29H-01	5	24508176	80630553	0.1177	0.5881	Mosaic Gain
ACC	TCGA-OR-A5JY-01A-31D-A29H-01	5	81090916	167341594	0.1996	0.2849	Mosaic Gain
ACC	TCGA-OR-A5JY-01A-31D-A29H-01	5	167529727	180692833	0.4481	0.0099	Mosaic cnLOH
ACC	TCGA-OR-A5JY-01A-31D-A29H-01	6	165632	1046615	0.3636	-0.495	Mosaic Loss
ACC	TCGA-OR-A5JY-01A-31D-A29H-01	6	20624358	22728496	0.1783	0.3657	Mosaic Gain
ACC	TCGA-OR-A5JY-01A-31D-A29H-01	6	24863869	25770239	0.3891	-0.413	Mosaic Loss
ACC	TCGA-OR-A5JY-01A-31D-A29H-01	6	33960611	35243670	0.3592	-0.4365	Mosaic Loss
ACC	TCGA-OR-A5JY-01A-31D-A29H-01	6	36395668	38317686	0.3789	-0.435	Mosaic Loss
ACC	TCGA-OR-A5JY-01A-31D-A29H-01	6	38742708	40527634	0.3642	-0.442	Mosaic Loss
ACC	TCGA-OR-A5JY-01A-31D-A29H-01	6	41773322	42992808	0.1505	0.2631	Inherited Duplication
ACC	TCGA-OR-A5JY-01A-31D-A29H-01	6	46629841	47207101	0.1693	0.2981	Inherited Duplication
ACC	TCGA-OR-A5JY-01A-31D-A29H-01	6	54632536	67611765	0.3721	-0.4055	Mosaic Loss
ACC	TCGA-OR-A5JY-01A-31D-A29H-01	6	68820474	69451081	0.3643	-0.4717	Mosaic Loss
ACC	TCGA-OR-A5JY-01A-31D-A29H-01	6	70367724	80415428	0.2737	0.1346	Mosaic Gain
ACC	TCGA-OR-A5JY-01A-31D-A29H-01	6	82410383	88128267	0.3411	-0.1767	Mosaic Loss
ACC	TCGA-OR-A5JY-01A-31D-A29H-01	6	90171481	92576951	0.3623	-0.2942	Mosaic Loss
ACC	TCGA-OR-A5JY-01A-31D-A29H-01	6	94221770	97102809	0.4014	-0.1614	Mosaic Loss
ACC	TCGA-OR-A5JY-01A-31D-A29H-01	6	97230516	102413176	0.1686	0.1262	Mosaic Gain
ACC	TCGA-OR-A5JY-01A-31D-A29H-01	6	107700192	112726733	0.1219	0.0912	Mosaic Gain
ACC	TCGA-OR-A5JY-01A-31D-A29H-01	6	113964094	132123724	0.3679	-0.3832	Mosaic Loss
ACC	TCGA-OR-A5JY-01A-31D-A29H-01	6	142590753	143012314	0.3869	-0.4125	Mosaic Loss
ACC	TCGA-OR-A5JY-01A-31D-A29H-01	6	143837723	170905977	0.4249	-0.1483	Mosaic Loss
ACC	TCGA-OR-A5JY-01A-31D-A29H-01	7	44167	55440775	0.216	0.4282	Mosaic Gain
ACC	TCGA-OR-A5JY-01A-31D-A29H-01	7	55509253	123018958	0.1434	0.3146	Mosaic Gain
ACC	TCGA-OR-A5JY-01A-31D-A29H-01	7	131201814	132115060	0.094	0.1408	Inherited Duplication
ACC	TCGA-OR-A5JY-01A-31D-A29H-01	7	137611566	141572858	0.0991	0.1492	Mosaic Gain
ACC	TCGA-OR-A5JY-01A-31D-A29H-01	7	150578201	159116965	0.1015	0.1383	Mosaic Gain
ACC	TCGA-OR-A5JY-01A-31D-A29H-01	8	113565	1079912	0.2524	-0.9638	Mosaic Loss
ACC	TCGA-OR-A5JY-01A-31D-A29H-01	8	3321662	3744363	0.3743	-0.4126	Mosaic Loss
ACC	TCGA-OR-A5JY-01A-31D-A29H-01	8	4462550	5521372	0.2161	0.1588	Inherited Duplication
ACC	TCGA-OR-A5JY-01A-31D-A29H-01	8	6214782	6812122	0.354	-0.4072	Mosaic Loss
ACC	TCGA-OR-A5JY-01A-31D-A29H-01	8	11415812	12907254	0.1597	0.3449	Inherited Duplication
ACC	TCGA-OR-A5JY-01A-31D-A29H-01	8	13728494	14862366	0.1563	0.4145	Inherited Duplication
ACC	TCGA-OR-A5JY-01A-31D-A29H-01	8	120290297	120672933	0.3953	1.1025	Inherited Duplication
ACC	TCGA-OR-A5JY-01A-31D-A29H-01	8	122329172	125074441	0.3899	0.9875	Mosaic Gain
ACC	TCGA-OR-A5JY-01A-31D-A29H-01	8	133877262	137814585	0.1559	0.2818	Mosaic Gain
ACC	TCGA-OR-A5JY-01A-31D-A29H-01	9	46587	38479114	0.1903	-0.1741	Mosaic Loss
ACC	TCGA-OR-A5JY-01A-31D-A29H-01	9	110772665	141071475	0.148	-0.083	Mosaic Loss
ACC	TCGA-OR-A5JY-01A-31D-A29H-01	10	7697504	8548716	0.3605	-0.3663	Mosaic Loss
ACC	TCGA-OR-A5JY-01A-31D-A29H-01	10	8948533	10340044	0.3911	-0.395	Mosaic Loss
ACC	TCGA-OR-A5JY-01A-31D-A29H-01	10	13187436	14260500	0.3722	-0.4399	Mosaic Loss
ACC	TCGA-OR-A5JY-01A-31D-A29H-01	10	15994390	21439233	0.3668	-0.404	Mosaic Loss
ACC	TCGA-OR-A5JY-01A-31D-A29H-01	10	22219556	51536399	0.3423	-0.3899	Mosaic Loss
ACC	TCGA-OR-A5JY-01A-31D-A29H-01	10	52762887	135434551	0.1311	-0.1602	Mosaic Loss
ACC	TCGA-OR-A5JY-01A-31D-A29H-01	11	211447	50149040	0.1603	-0.1733	Mosaic Loss
ACC	TCGA-OR-A5JY-01A-31D-A29H-01	11	126133182	134942626	0.1224	0.1426	Mosaic Gain
ACC	TCGA-OR-A5JY-01A-31D-A29H-01	12	161382	2486711	0.0786	0.1706	Mosaic Gain
ACC	TCGA-OR-A5JY-01A-31D-A29H-01	12	3690249	5241385	0.1938	0.3354	Inherited Duplication
ACC	TCGA-OR-A5JY-01A-31D-A29H-01	12	20536297	73694683	0.2782	0.654	Mosaic Gain
ACC	TCGA-OR-A5JY-01A-31D-A29H-01	12	78188510	79178089	0.1714	0.2721	Inherited Duplication
ACC	TCGA-OR-A5JY-01A-31D-A29H-01	12	120369579	133777645	0.1527	0.2557	Mosaic Gain
ACC	TCGA-OR-A5JY-01A-31D-A29H-01	13	19045628	59245163	0.1804	-0.192	Mosaic Loss
ACC	TCGA-OR-A5JY-01A-31D-A29H-01	13	63612643	73907772	0.1382	0.0753	Mosaic Gain
ACC	TCGA-OR-A5JY-01A-31D-A29H-01	13	75880667	76378459	0.101	0.2586	Inherited Duplication
ACC	TCGA-OR-A5JY-01A-31D-A29H-01	13	104129932	106835388	0.1746	0.3962	Mosaic Gain
ACC	TCGA-OR-A5JY-01A-31D-A29H-01	13	108049828	109691348	0.1116	0.254	Inherited Duplication
ACC	TCGA-OR-A5JY-01A-31D-A29H-01	14	20224003	26722094	0.2403	0.1037	Mosaic Gain
ACC	TCGA-OR-A5JY-01A-31D-A29H-01	14	27471083	50020817	0.1494	-0.0597	Mosaic Loss
ACC	TCGA-OR-A5JY-01A-31D-A29H-01	14	63980731	66487919	0.1381	0.3282	Mosaic Gain
ACC	TCGA-OR-A5JY-01A-31D-A29H-01	14	71129394	82299028	0.1427	-0.1446	Mosaic Loss
ACC	TCGA-OR-A5JY-01A-31D-A29H-01	14	82543559	107285437	0.3965	-0.1547	Mosaic Loss
ACC	TCGA-OR-A5JY-01A-31D-A29H-01	15	20071673	58210855	0.4234	0.1493	Mosaic Gain
ACC	TCGA-OR-A5JY-01A-31D-A29H-01	15	63048427	69520314	0.1525	0.3198	Mosaic Gain
ACC	TCGA-OR-A5JY-01A-31D-A29H-01	15	71065938	82395938	0.1268	0.3035	Mosaic Gain
ACC	TCGA-OR-A5JY-01A-31D-A29H-01	15	95271164	96563312	0.3623	-0.4098	Mosaic Loss
ACC	TCGA-OR-A5JY-01A-31D-A29H-01	15	97910353	98377644	0.3607	-0.4189	Mosaic Loss
ACC	TCGA-OR-A5JY-01A-31D-A29H-01	15	100600393	102105793	0.0904	0.1898	Inherited Duplication
ACC	TCGA-OR-A5JY-01A-31D-A29H-01	15	102224341	102400037	0.3369	0.0148	Mosaic cnLOH
ACC	TCGA-OR-A5JY-01A-31D-A29H-01	16	86671	90163275	0.4195	-0.1879	Mosaic Loss
ACC	TCGA-OR-A5JY-01A-31D-A29H-01	17	6689	2577177	0.3587	-0.3683	Mosaic Loss
ACC	TCGA-OR-A5JY-01A-31D-A29H-01	17	3882309	10495245	0.373	-0.3922	Mosaic Loss
ACC	TCGA-OR-A5JY-01A-31D-A29H-01	18	356337	6848606	0.2854	-0.1733	Mosaic Loss
ACC	TCGA-OR-A5JY-01A-31D-A29H-01	18	8978443	12926278	0.2382	-0.5246	Mosaic Loss
ACC	TCGA-OR-A5JY-01A-31D-A29H-01	18	14144777	24960257	0.1455	-0.1592	Mosaic Loss
ACC	TCGA-OR-A5JY-01A-31D-A29H-01	18	55360092	59836008	0.1009	0.2224	Mosaic Gain
ACC	TCGA-OR-A5JY-01A-31D-A29H-01	18	62230679	63807246	0.1361	-0.1064	Mosaic Loss
ACC	TCGA-OR-A5JY-01A-31D-A29H-01	18	69039896	77982107	0.1356	-0.1511	Mosaic Loss
ACC	TCGA-OR-A5JY-01A-31D-A29H-01	20	32996101	34160455	0.1104	0.191	Inherited Duplication
ACC	TCGA-OR-A5JY-01A-31D-A29H-01	20	55566358	62912463	0.2449	-0.3259	Mosaic Loss
ACC	TCGA-OR-A5JY-01A-31D-A29H-01	21	10962411	48084820	0.4238	-0.1598	Mosaic Loss
ACC	TCGA-OR-A5JY-01A-31D-A29H-01	22	16055171	18518829	0.1696	0.3708	Mosaic Gain
ACC	TCGA-OR-A5JY-01A-31D-A29H-01	22	20776843	24719605	0.251	-0.074	Mosaic Loss
ACC	TCGA-OR-A5JY-01A-31D-A29H-01	22	25390704	26778747	0.3623	-0.4345	Mosaic Loss
ACC	TCGA-OR-A5JY-01A-31D-A29H-01	22	28073495	30147038	0.3671	-0.4086	Mosaic Loss
ACC	TCGA-OR-A5JY-01A-31D-A29H-01	22	31353670	49550176	0.3665	-0.4255	Mosaic Loss
ACC	TCGA-OR-A5JZ-01A-11D-A29H-01	1	2302911	249198692	0.4154	-0.082	Mosaic Loss
ACC	TCGA-OR-A5JZ-01A-11D-A29H-01	2	15703	243048760	0.4185	-0.065	Mosaic Loss
ACC	TCGA-OR-A5JZ-01A-11D-A29H-01	3	69244	197808975	0.4173	-0.0585	Mosaic Loss
ACC	TCGA-OR-A5JZ-01A-11D-A29H-01	4	61981	190930894	0.4208	-0.0453	Mosaic cnLOH
ACC	TCGA-OR-A5JZ-01A-11D-A29H-01	5	36344	1257621	0.1405	0.7567	Inherited Duplication
ACC	TCGA-OR-A5JZ-01A-11D-A29H-01	5	1450444	20555487	0.141	0.7511	Mosaic Gain
ACC	TCGA-OR-A5JZ-01A-11D-A29H-01	5	26785235	35692775	0.1362	0.7865	Mosaic Gain
ACC	TCGA-OR-A5JZ-01A-11D-A29H-01	5	38321765	39552415	0.1332	0.775	Inherited Duplication
ACC	TCGA-OR-A5JZ-01A-11D-A29H-01	5	57367770	113208986	0.4159	-0.0637	Mosaic Loss
ACC	TCGA-OR-A5JZ-01A-11D-A29H-01	5	114293855	120944560	0.4191	-0.0406	Mosaic cnLOH
ACC	TCGA-OR-A5JZ-01A-11D-A29H-01	5	121650740	123510199	0.4004	-0.0455	Mosaic cnLOH
ACC	TCGA-OR-A5JZ-01A-11D-A29H-01	6	316401	170905977	0.418	-0.0624	Mosaic Loss
ACC	TCGA-OR-A5JZ-01A-11D-A29H-01	7	44167	158919442	0.4149	-0.0898	Mosaic Loss
ACC	TCGA-OR-A5JZ-01A-11D-A29H-01	9	101857	141071475	0.4176	-0.0578	Mosaic Loss
ACC	TCGA-OR-A5JZ-01A-11D-A29H-01	10	104427	135434551	0.4153	-0.0634	Mosaic Loss
ACC	TCGA-OR-A5JZ-01A-11D-A29H-01	11	211447	134942626	0.416	-0.0673	Mosaic Loss
ACC	TCGA-OR-A5JZ-01A-11D-A29H-01	13	19260565	115106996	0.4214	-0.0323	Mosaic cnLOH
ACC	TCGA-OR-A5JZ-01A-11D-A29H-01	14	20211644	102993303	0.4167	-0.0588	Mosaic Loss
ACC	TCGA-OR-A5JZ-01A-11D-A29H-01	14	103440473	107285437	0.3996	-0.079	Mosaic Loss
ACC	TCGA-OR-A5JZ-01A-11D-A29H-01	15	20071673	102395843	0.4137	-0.071	Mosaic Loss
ACC	TCGA-OR-A5JZ-01A-11D-A29H-01	17	102209	81048659	0.4093	-0.0732	Mosaic Loss
ACC	TCGA-OR-A5JZ-01A-11D-A29H-01	18	100949	78014582	0.4179	-0.0628	Mosaic Loss
ACC	TCGA-OR-A5JZ-01A-11D-A29H-01	19	260912	753950	0.4409	-0.0563	Mosaic Loss
ACC	TCGA-OR-A5JZ-01A-11D-A29H-01	19	4913071	45196135	0.4056	-0.1125	Mosaic Loss
ACC	TCGA-OR-A5JZ-01A-11D-A29H-01	19	45329214	59093464	0.4046	-0.1038	Mosaic Loss
ACC	TCGA-OR-A5JZ-01A-11D-A29H-01	21	14635153	48084820	0.4152	-0.0655	Mosaic Loss
ACC	TCGA-OR-A5JZ-01A-11D-A29H-01	22	16055171	51219006	0.405	-0.0956	Mosaic Loss
ACC	TCGA-OR-A5K0-01A-11D-A29H-01	1	761732	119069497	0.4349	-0.3389	Mosaic Loss
ACC	TCGA-OR-A5K0-01A-11D-A29H-01	1	119080503	163229426	0.1649	0.4077	Mosaic Gain
ACC	TCGA-OR-A5K0-01A-11D-A29H-01	1	163356825	249198692	0.4371	-0.3452	Mosaic Loss
ACC	TCGA-OR-A5K0-01A-11D-A29H-01	2	216116915	217171643	0.4172	-0.2635	Mosaic Loss
ACC	TCGA-OR-A5K0-01A-11D-A29H-01	2	220128895	221320545	0.4064	-0.2949	Mosaic Loss
ACC	TCGA-OR-A5K0-01A-11D-A29H-01	2	222865746	227208908	0.4237	-0.3583	Mosaic Loss
ACC	TCGA-OR-A5K0-01A-11D-A29H-01	2	227968241	242531522	0.4166	-0.4407	Mosaic Loss
ACC	TCGA-OR-A5K0-01A-11D-A29H-01	3	118676492	197328215	0.4212	-0.4463	Mosaic Loss
ACC	TCGA-OR-A5K0-01A-11D-A29H-01	5	96089111	114160168	0.4179	-0.4497	Mosaic Loss
ACC	TCGA-OR-A5K0-01A-11D-A29H-01	5	115886945	116513164	0.4265	-0.4902	Mosaic Loss
ACC	TCGA-OR-A5K0-01A-11D-A29H-01	5	116722565	122518945	0.4184	-0.4237	Mosaic Loss
ACC	TCGA-OR-A5K0-01A-11D-A29H-01	5	125010130	125682372	0.421	-0.4488	Mosaic Loss
ACC	TCGA-OR-A5K0-01A-11D-A29H-01	6	375759	12359302	0.4149	-0.4706	Mosaic Loss
ACC	TCGA-OR-A5K0-01A-11D-A29H-01	6	124223375	126378827	0.1604	0.5498	Mosaic Gain
ACC	TCGA-OR-A5K0-01A-11D-A29H-01	6	146162239	149793633	0.1695	0.5105	Mosaic Gain
ACC	TCGA-OR-A5K0-01A-11D-A29H-01	6	161855470	164019871	0.4213	-0.4326	Mosaic Loss
ACC	TCGA-OR-A5K0-01A-11D-A29H-01	9	326400	75389912	0.4145	-0.3788	Mosaic Loss
ACC	TCGA-OR-A5K0-01A-11D-A29H-01	9	76979582	119567708	0.1679	0.4834	Mosaic Gain
ACC	TCGA-OR-A5K0-01A-11D-A29H-01	9	120537346	121526270	0.1579	0.5354	Inherited Duplication
ACC	TCGA-OR-A5K0-01A-11D-A29H-01	9	122762741	123948375	0.1635	0.4845	Inherited Duplication
ACC	TCGA-OR-A5K0-01A-11D-A29H-01	10	134292345	135434551	0.3988	-0.3629	Mosaic Loss
ACC	TCGA-OR-A5K0-01A-11D-A29H-01	11	211447	467339	0.049	0.124	Inherited Duplication
ACC	TCGA-OR-A5K0-01A-11D-A29H-01	11	105138815	134942626	0.4217	-0.4463	Mosaic Loss
ACC	TCGA-OR-A5K0-01A-11D-A29H-01	12	132175106	133777645	0.1632	0.4752	Inherited Duplication
ACC	TCGA-OR-A5K0-01A-11D-A29H-01	13	19045628	65823672	0.4278	-0.4036	Mosaic Loss
ACC	TCGA-OR-A5K0-01A-11D-A29H-01	13	113463616	115075715	0.3957	-0.4273	Mosaic Loss
ACC	TCGA-OR-A5K0-01A-11D-A29H-01	16	5365646	6281263	0.4258	-0.427	Mosaic Loss
ACC	TCGA-OR-A5K0-01A-11D-A29H-01	16	34928236	90163275	0.4204	-0.4451	Mosaic Loss
ACC	TCGA-OR-A5K0-01A-11D-A29H-01	19	1364306	22652436	0.1666	0.4279	Mosaic Gain
ACC	TCGA-OR-A5K0-01A-11D-A29H-01	19	28319922	29655286	0.4164	-0.4643	Mosaic Loss
ACC	TCGA-OR-A5K0-01A-11D-A29H-01	20	61795	1111874	0.4176	-0.443	Mosaic Loss
ACC	TCGA-OR-A5K0-01A-11D-A29H-01	20	2597560	26232228	0.4201	-0.4749	Mosaic Loss
ACC	TCGA-OR-A5K0-01A-11D-A29H-01	20	58725519	62877004	0.1924	0.3096	Mosaic Gain
ACC	TCGA-OR-A5K0-01A-11D-A29H-01	21	47550754	48084820	0.4283	-0.2858	Mosaic Loss
ACC	TCGA-OR-A5K1-01A-11D-A29H-01	1	947034	249198692	0.3681	-0.1852	Mosaic Loss
ACC	TCGA-OR-A5K1-01A-11D-A29H-01	2	15703	243048760	0.3711	-0.1677	Mosaic Loss
ACC	TCGA-OR-A5K1-01A-11D-A29H-01	3	69244	197808975	0.3712	-0.1663	Mosaic Loss
ACC	TCGA-OR-A5K1-01A-11D-A29H-01	4	61981	190878907	0.3722	-0.1494	Mosaic Loss
ACC	TCGA-OR-A5K1-01A-11D-A29H-01	6	229191	170735267	0.3705	-0.1648	Mosaic Loss
ACC	TCGA-OR-A5K1-01A-11D-A29H-01	9	407575	141071475	0.368	-0.1622	Mosaic Loss
ACC	TCGA-OR-A5K1-01A-11D-A29H-01	10	104427	135434551	0.3681	-0.1686	Mosaic Loss
ACC	TCGA-OR-A5K1-01A-11D-A29H-01	11	211447	134942626	0.3688	-0.1694	Mosaic Loss
ACC	TCGA-OR-A5K1-01A-11D-A29H-01	13	19226222	115106996	0.3751	-0.1405	Mosaic Loss
ACC	TCGA-OR-A5K1-01A-11D-A29H-01	14	20211644	107285437	0.3715	-0.1646	Mosaic Loss
ACC	TCGA-OR-A5K1-01A-11D-A29H-01	15	20071673	102400037	0.3688	-0.1749	Mosaic Loss
ACC	TCGA-OR-A5K1-01A-11D-A29H-01	17	204759	81048659	0.3664	-0.1764	Mosaic Loss
ACC	TCGA-OR-A5K1-01A-11D-A29H-01	18	100949	78014582	0.3706	-0.1663	Mosaic Loss
ACC	TCGA-OR-A5K1-01A-11D-A29H-01	19	260912	59093239	0.3634	-0.2172	Mosaic Loss
ACC	TCGA-OR-A5K1-01A-11D-A29H-01	21	15482718	48084820	0.3676	-0.1709	Mosaic Loss
ACC	TCGA-OR-A5K1-01A-11D-A29H-01	22	16055171	51219006	0.3605	-0.1954	Mosaic Loss
ACC	TCGA-OR-A5K2-01A-11D-A29H-01	1	9009406	21790721	0.1451	0.0509	Mosaic Gain
ACC	TCGA-OR-A5K2-01A-11D-A29H-01	1	23147403	25717365	0.0942	-0.0922	Mosaic Loss
ACC	TCGA-OR-A5K2-01A-11D-A29H-01	1	26370267	48196590	0.1031	-0.0505	Mosaic Loss
ACC	TCGA-OR-A5K2-01A-11D-A29H-01	1	53711735	58609727	0.116	-0.0134	Mosaic cnLOH
ACC	TCGA-OR-A5K2-01A-11D-A29H-01	1	63386444	66239897	0.0915	-0.0446	Mosaic Subtle
ACC	TCGA-OR-A5K2-01A-11D-A29H-01	1	74344710	83283523	0.1044	-0.0226	Mosaic cnLOH
ACC	TCGA-OR-A5K2-01A-11D-A29H-01	1	84059605	249198692	0.1345	0.0451	Mosaic cnLOH
ACC	TCGA-OR-A5K2-01A-11D-A29H-01	2	15703	121124076	0.151	0.0645	Mosaic Gain
ACC	TCGA-OR-A5K2-01A-11D-A29H-01	2	139833296	243048760	0.1504	0.0804	Mosaic Gain
ACC	TCGA-OR-A5K2-01A-11D-A29H-01	3	69244	197793905	0.1513	0.0742	Mosaic Gain
ACC	TCGA-OR-A5K2-01A-11D-A29H-01	5	598643	2197203	0.1028	0.4092	Inherited Duplication
ACC	TCGA-OR-A5K2-01A-11D-A29H-01	5	2394854	3517137	0.384	-0.2393	Mosaic Loss
ACC	TCGA-OR-A5K2-01A-11D-A29H-01	5	4243292	10732289	0.3923	-0.267	Mosaic Loss
ACC	TCGA-OR-A5K2-01A-11D-A29H-01	5	12240655	17469690	0.1585	0.3145	Mosaic Gain
ACC	TCGA-OR-A5K2-01A-11D-A29H-01	5	21575539	180692833	0.146	0.0601	Mosaic Gain
ACC	TCGA-OR-A5K2-01A-11D-A29H-01	6	165632	62037559	0.1519	0.0341	Mosaic cnLOH
ACC	TCGA-OR-A5K2-01A-11D-A29H-01	6	130692798	131995313	0.3567	0.7155	Inherited Duplication
ACC	TCGA-OR-A5K2-01A-11D-A29H-01	6	133962467	138132516	0.1575	0.1346	Mosaic Gain
ACC	TCGA-OR-A5K2-01A-11D-A29H-01	6	139428758	150896922	0.2639	0.3717	Mosaic Gain
ACC	TCGA-OR-A5K2-01A-11D-A29H-01	6	151400355	170063654	0.2283	-0.0676	Mosaic Loss
ACC	TCGA-OR-A5K2-01A-11D-A29H-01	7	161517	159116965	0.1541	0.0418	Mosaic cnLOH
ACC	TCGA-OR-A5K2-01A-11D-A29H-01	8	113565	2971213	0.173	0.0078	Mosaic cnLOH
ACC	TCGA-OR-A5K2-01A-11D-A29H-01	8	3035278	10200886	0.1963	-0.0002	Mosaic cnLOH
ACC	TCGA-OR-A5K2-01A-11D-A29H-01	8	10437868	146293414	0.1585	0.0106	Mosaic cnLOH
ACC	TCGA-OR-A5K2-01A-11D-A29H-01	9	9938443	10255370	0.2662	-0.635	Mosaic Loss
ACC	TCGA-OR-A5K2-01A-11D-A29H-01	9	71035703	141005772	0.2591	0.3457	Mosaic Gain
ACC	TCGA-OR-A5K2-01A-11D-A29H-01	10	104563743	135434551	0.1479	0.0653	Mosaic Gain
ACC	TCGA-OR-A5K2-01A-11D-A29H-01	11	211447	134759896	0.1497	0.064	Mosaic Gain
ACC	TCGA-OR-A5K2-01A-11D-A29H-01	12	133726624	133777645	0.0956	0.25	Inherited Duplication
ACC	TCGA-OR-A5K2-01A-11D-A29H-01	13	19045628	115106996	0.4035	-0.1902	Mosaic Loss
ACC	TCGA-OR-A5K2-01A-11D-A29H-01	14	20211644	20712322	0.1541	0.0844	Inherited Duplication
ACC	TCGA-OR-A5K2-01A-11D-A29H-01	14	20913292	107285437	0.1533	0.0734	Mosaic Gain
ACC	TCGA-OR-A5K2-01A-11D-A29H-01	15	20071673	102400037	0.1268	0.0102	Mosaic cnLOH
ACC	TCGA-OR-A5K2-01A-11D-A29H-01	16	86671	71065311	0.1482	0.0401	Mosaic cnLOH
ACC	TCGA-OR-A5K2-01A-11D-A29H-01	16	71168746	90097995	0.2181	-0.0341	Mosaic cnLOH
ACC	TCGA-OR-A5K2-01A-11D-A29H-01	17	42154011	80977131	0.147	0.0489	Mosaic cnLOH
ACC	TCGA-OR-A5K2-01A-11D-A29H-01	19	3187430	59093464	0.2555	0.2061	Mosaic Gain
ACC	TCGA-OR-A5K2-01A-11D-A29H-01	20	61795	62912463	0.1484	0.0168	Mosaic cnLOH
ACC	TCGA-OR-A5K2-01A-11D-A29H-01	21	10962411	48084820	0.1535	0.0697	Mosaic Gain
ACC	TCGA-OR-A5K2-01A-11D-A29H-01	22	16055171	21002437	0.1584	-0.2266	Mosaic Loss
ACC	TCGA-OR-A5K2-01A-11D-A29H-01	22	25436904	32974574	0.2536	-0.4812	Mosaic Loss
ACC	TCGA-OR-A5K2-01A-11D-A29H-01	22	33904754	36781680	0.1015	-0.1066	Mosaic Loss
ACC	TCGA-OR-A5K2-01A-11D-A29H-01	22	39190465	51219006	0.1267	-0.0363	Mosaic cnLOH
ACC	TCGA-OR-A5K3-01A-11D-A29H-01	1	761732	249198692	0.3993	-0.1013	Mosaic Loss
ACC	TCGA-OR-A5K3-01A-11D-A29H-01	2	15703	243048760	0.4024	-0.0837	Mosaic Loss
ACC	TCGA-OR-A5K3-01A-11D-A29H-01	3	69244	197808975	0.4009	-0.0839	Mosaic Loss
ACC	TCGA-OR-A5K3-01A-11D-A29H-01	4	61981	48260825	0.1612	0.7079	Mosaic Gain
ACC	TCGA-OR-A5K3-01A-11D-A29H-01	4	48312522	190563987	0.4047	-0.0535	Mosaic Loss
ACC	TCGA-OR-A5K3-01A-11D-A29H-01	6	192106	170821226	0.4022	-0.0832	Mosaic Loss
ACC	TCGA-OR-A5K3-01A-11D-A29H-01	8	161222	146293414	0.3981	-0.1231	Mosaic Loss
ACC	TCGA-OR-A5K3-01A-11D-A29H-01	9	46587	141071475	0.401	-0.0781	Mosaic Loss
ACC	TCGA-OR-A5K3-01A-11D-A29H-01	10	104427	135434551	0.4016	-0.083	Mosaic Loss
ACC	TCGA-OR-A5K3-01A-11D-A29H-01	11	211447	134942626	0.4011	-0.0858	Mosaic Loss
ACC	TCGA-OR-A5K3-01A-11D-A29H-01	13	19260565	115106996	0.4058	-0.0563	Mosaic Loss
ACC	TCGA-OR-A5K3-01A-11D-A29H-01	14	20211644	107285437	0.4012	-0.0766	Mosaic Loss
ACC	TCGA-OR-A5K3-01A-11D-A29H-01	15	20071673	93649439	0.3992	-0.0865	Mosaic Loss
ACC	TCGA-OR-A5K3-01A-11D-A29H-01	15	93666491	102395843	0.4005	-0.093	Mosaic Loss
ACC	TCGA-OR-A5K3-01A-11D-A29H-01	16	78798087	79084547	0.408	-0.0802	Mosaic Loss
ACC	TCGA-OR-A5K3-01A-11D-A29H-01	17	43474	14005373	0.4018	-0.0592	Mosaic Loss
ACC	TCGA-OR-A5K3-01A-11D-A29H-01	17	14024479	75535097	0.3962	-0.0918	Mosaic Loss
ACC	TCGA-OR-A5K3-01A-11D-A29H-01	17	75781402	81048659	0.3918	-0.0986	Mosaic Loss
ACC	TCGA-OR-A5K3-01A-11D-A29H-01	18	100949	3345173	0.4051	-0.057	Mosaic Loss
ACC	TCGA-OR-A5K3-01A-11D-A29H-01	18	3510785	78014582	0.4037	-0.0787	Mosaic Loss
ACC	TCGA-OR-A5K3-01A-11D-A29H-01	21	14736298	48084820	0.4032	-0.0811	Mosaic Loss
ACC	TCGA-OR-A5K3-01A-11D-A29H-01	22	16055171	37257855	0.3961	-0.1156	Mosaic Loss
ACC	TCGA-OR-A5K3-01A-11D-A29H-01	22	37331305	51219006	0.394	-0.0873	Mosaic Loss
ACC	TCGA-OR-A5K4-01A-11D-A29H-01	1	761732	35217966	0.4307	-0.1361	Mosaic Loss
ACC	TCGA-OR-A5K4-01A-11D-A29H-01	1	35674311	249198692	0.4353	-0.1566	Mosaic Loss
ACC	TCGA-OR-A5K4-01A-11D-A29H-01	2	15703	243048760	0.4378	-0.136	Mosaic Loss
ACC	TCGA-OR-A5K4-01A-11D-A29H-01	3	69244	197808975	0.4375	-0.1356	Mosaic Loss
ACC	TCGA-OR-A5K4-01A-11D-A29H-01	5	180226571	180692833	0.0503	0.2647	Inherited Duplication
ACC	TCGA-OR-A5K4-01A-11D-A29H-01	6	165632	11826208	0.43	-0.1833	Mosaic Loss
ACC	TCGA-OR-A5K4-01A-11D-A29H-01	6	11907715	151892135	0.4387	-0.1317	Mosaic Loss
ACC	TCGA-OR-A5K4-01A-11D-A29H-01	6	153132818	170905977	0.438	-0.1352	Mosaic Loss
ACC	TCGA-OR-A5K4-01A-11D-A29H-01	7	44167	158986108	0.4339	-0.1649	Mosaic Loss
ACC	TCGA-OR-A5K4-01A-11D-A29H-01	9	192129	141071475	0.4358	-0.1288	Mosaic Loss
ACC	TCGA-OR-A5K4-01A-11D-A29H-01	10	104427	135434551	0.436	-0.1345	Mosaic Loss
ACC	TCGA-OR-A5K4-01A-11D-A29H-01	11	211447	134942626	0.4384	-0.1425	Mosaic Loss
ACC	TCGA-OR-A5K4-01A-11D-A29H-01	12	161382	239787	0.0607	0.5111	Inherited Duplication
ACC	TCGA-OR-A5K4-01A-11D-A29H-01	13	19045628	115106996	0.4416	-0.1059	Mosaic Loss
ACC	TCGA-OR-A5K4-01A-11D-A29H-01	14	20211644	107285437	0.4397	-0.1313	Mosaic Loss
ACC	TCGA-OR-A5K4-01A-11D-A29H-01	15	20071673	102400037	0.4361	-0.1383	Mosaic Loss
ACC	TCGA-OR-A5K4-01A-11D-A29H-01	17	185918	81048659	0.4337	-0.1442	Mosaic Loss
ACC	TCGA-OR-A5K4-01A-11D-A29H-01	18	100949	78014582	0.4398	-0.132	Mosaic Loss
ACC	TCGA-OR-A5K4-01A-11D-A29H-01	19	260912	59093464	0.4304	-0.1759	Mosaic Loss
ACC	TCGA-OR-A5K4-01A-11D-A29H-01	21	14642464	48084820	0.4386	-0.1297	Mosaic Loss
ACC	TCGA-OR-A5K4-01A-11D-A29H-01	22	16055171	51027204	0.4312	-0.1639	Mosaic Loss
ACC	TCGA-OR-A5K5-01A-11D-A29H-01	1	145394955	249198692	0.2346	0.1735	Mosaic Gain
ACC	TCGA-OR-A5K5-01A-11D-A29H-01	3	15685137	17458581	0.1518	-0.0189	Mosaic cnLOH
ACC	TCGA-OR-A5K5-01A-11D-A29H-01	3	18536553	24958459	0.1601	0.0086	Mosaic cnLOH
ACC	TCGA-OR-A5K5-01A-11D-A29H-01	3	25194969	89674140	0.158	-0.0104	Mosaic cnLOH
ACC	TCGA-OR-A5K5-01A-11D-A29H-01	3	174580571	175113445	0.1586	-0.0026	Mosaic cnLOH
ACC	TCGA-OR-A5K5-01A-11D-A29H-01	4	159061	182589046	0.1557	0.0003	Mosaic cnLOH
ACC	TCGA-OR-A5K5-01A-11D-A29H-01	4	183713191	190563987	0.16	0.0064	Mosaic cnLOH
ACC	TCGA-OR-A5K5-01A-11D-A29H-01	6	190044	170905977	0.1546	-0.0082	Mosaic cnLOH
ACC	TCGA-OR-A5K5-01A-11D-A29H-01	7	129941604	159116965	0.1495	-0.0415	Mosaic cnLOH
ACC	TCGA-OR-A5K5-01A-11D-A29H-01	8	113565	37485544	0.1492	0.0127	Mosaic cnLOH
ACC	TCGA-OR-A5K5-01A-11D-A29H-01	8	40082330	41165741	0.1373	-0.0649	Mosaic Loss
ACC	TCGA-OR-A5K5-01A-11D-A29H-01	9	20530136	35149831	0.3071	-0.6921	Mosaic Loss
ACC	TCGA-OR-A5K5-01A-11D-A29H-01	9	36217798	71229124	0.1939	0.022	Mosaic cnLOH
ACC	TCGA-OR-A5K5-01A-11D-A29H-01	9	75740893	105534770	0.1524	-0.0121	Mosaic cnLOH
ACC	TCGA-OR-A5K5-01A-11D-A29H-01	9	105890136	109183936	0.1575	0.0029	Mosaic cnLOH
ACC	TCGA-OR-A5K5-01A-11D-A29H-01	9	110494208	111779247	0.125	0.0366	Mosaic cnLOH
ACC	TCGA-OR-A5K5-01A-11D-A29H-01	9	112891694	115135050	0.1394	0.0145	Mosaic cnLOH
ACC	TCGA-OR-A5K5-01A-11D-A29H-01	9	131689361	141071475	0.1461	-0.0256	Mosaic cnLOH
ACC	TCGA-OR-A5K5-01A-11D-A29H-01	10	104427	123880823	0.1638	0.0111	Mosaic cnLOH
ACC	TCGA-OR-A5K5-01A-11D-A29H-01	10	124024608	135434551	0.4096	-0.3095	Mosaic Loss
ACC	TCGA-OR-A5K5-01A-11D-A29H-01	11	211447	1418877	0.1395	-0.0083	Mosaic cnLOH
ACC	TCGA-OR-A5K5-01A-11D-A29H-01	11	1650805	80311671	0.1555	-0.0316	Mosaic cnLOH
ACC	TCGA-OR-A5K5-01A-11D-A29H-01	12	225655	34027419	0.1539	-0.035	Mosaic cnLOH
ACC	TCGA-OR-A5K5-01A-11D-A29H-01	12	39556893	44981990	0.1046	0.4047	Mosaic Gain
ACC	TCGA-OR-A5K5-01A-11D-A29H-01	12	50490099	55291474	0.0946	0.3194	Mosaic Gain
ACC	TCGA-OR-A5K5-01A-11D-A29H-01	12	58056763	72335794	0.0984	0.3847	Mosaic Gain
ACC	TCGA-OR-A5K5-01A-11D-A29H-01	12	80511712	82472014	0.0887	0.4602	Inherited Duplication
ACC	TCGA-OR-A5K5-01A-11D-A29H-01	12	85526857	97110582	0.1054	0.4059	Mosaic Gain
ACC	TCGA-OR-A5K5-01A-11D-A29H-01	12	100754045	110276052	0.1108	0.3609	Mosaic Gain
ACC	TCGA-OR-A5K5-01A-11D-A29H-01	12	114129719	115299775	0.1067	0.282	Inherited Duplication
ACC	TCGA-OR-A5K5-01A-11D-A29H-01	12	118943668	130892163	0.095	0.3493	Mosaic Gain
ACC	TCGA-OR-A5K5-01A-11D-A29H-01	12	133617701	133777645	0.0978	0.3729	Inherited Duplication
ACC	TCGA-OR-A5K5-01A-11D-A29H-01	13	19045628	115106996	0.4113	-0.2913	Mosaic Loss
ACC	TCGA-OR-A5K5-01A-11D-A29H-01	14	20211644	107285437	0.1864	-0.0644	Mosaic Loss
ACC	TCGA-OR-A5K5-01A-11D-A29H-01	15	46765348	102395843	0.1503	-0.0263	Mosaic cnLOH
ACC	TCGA-OR-A5K5-01A-11D-A29H-01	16	46792881	90163275	0.1557	-0.0229	Mosaic cnLOH
ACC	TCGA-OR-A5K5-01A-11D-A29H-01	17	6689	36836115	0.3598	-0.2258	Mosaic Loss
ACC	TCGA-OR-A5K5-01A-11D-A29H-01	17	38140927	80464705	0.1465	-0.034	Mosaic cnLOH
ACC	TCGA-OR-A5K5-01A-11D-A29H-01	18	12820900	33853628	0.1573	-0.0072	Mosaic cnLOH
ACC	TCGA-OR-A5K5-01A-11D-A29H-01	18	34499369	78014582	0.1534	-0.0133	Mosaic cnLOH
ACC	TCGA-OR-A5K5-01A-11D-A29H-01	19	13603320	16205676	0.1476	0.4603	Mosaic Gain
ACC	TCGA-OR-A5K5-01A-11D-A29H-01	19	18749412	23713154	0.1061	0.4115	Mosaic Gain
ACC	TCGA-OR-A5K5-01A-11D-A29H-01	20	597738	36243810	0.15	-0.0607	Mosaic Loss
ACC	TCGA-OR-A5K5-01A-11D-A29H-01	20	36737339	62912463	0.1497	-0.0778	Mosaic Loss
ACC	TCGA-OR-A5K5-01A-11D-A29H-01	21	10962411	26226102	0.1569	0.0097	Mosaic cnLOH
ACC	TCGA-OR-A5K5-01A-11D-A29H-01	21	29761086	34527885	0.1537	-0.0036	Mosaic cnLOH
ACC	TCGA-OR-A5K5-01A-11D-A29H-01	21	36380543	48084820	0.1505	-0.0437	Mosaic cnLOH
ACC	TCGA-OR-A5K5-01A-11D-A29H-01	22	16055171	51175626	0.4031	-0.339	Mosaic Loss
ACC	TCGA-OR-A5K6-01A-11D-A29H-01	1	1158631	98652088	0.3703	-0.4289	Mosaic Loss
ACC	TCGA-OR-A5K6-01A-11D-A29H-01	7	94348	31812676	0.1362	0.3728	Mosaic Gain
ACC	TCGA-OR-A5K6-01A-11D-A29H-01	7	67242149	68851521	0.0751	0.1924	Inherited Duplication
ACC	TCGA-OR-A5K6-01A-11D-A29H-01	7	77671786	85976321	0.1098	0.3028	Mosaic Gain
ACC	TCGA-OR-A5K6-01A-11D-A29H-01	7	86366744	159116575	0.3445	-0.3655	Mosaic Loss
ACC	TCGA-OR-A5K6-01A-11D-A29H-01	9	218183	4935078	0.3617	-0.4329	Mosaic Loss
ACC	TCGA-OR-A5K6-01A-11D-A29H-01	9	6845561	8986928	0.3639	-0.4343	Mosaic Loss
ACC	TCGA-OR-A5K6-01A-11D-A29H-01	9	9517393	38805319	0.3571	-0.4262	Mosaic Loss
ACC	TCGA-OR-A5K6-01A-11D-A29H-01	11	217140	134942626	0.3704	-0.4504	Mosaic Loss
ACC	TCGA-OR-A5K6-01A-11D-A29H-01	12	161382	229947	0.0237	0.2387	Inherited Duplication
ACC	TCGA-OR-A5K6-01A-11D-A29H-01	17	55165612	65276901	0.1676	0.2335	Mosaic Gain
ACC	TCGA-OR-A5K6-01A-11D-A29H-01	17	66425317	81048659	0.3397	-0.3811	Mosaic Loss
ACC	TCGA-OR-A5K8-01A-11D-A29H-01	1	761732	249198692	0.3762	-0.2751	Mosaic Loss
ACC	TCGA-OR-A5K8-01A-11D-A29H-01	2	15703	243048760	0.3792	-0.2573	Mosaic Loss
ACC	TCGA-OR-A5K8-01A-11D-A29H-01	3	69244	116468382	0.3822	-0.25	Mosaic Loss
ACC	TCGA-OR-A5K8-01A-11D-A29H-01	3	116694929	197279398	0.3784	-0.2691	Mosaic Loss
ACC	TCGA-OR-A5K8-01A-11D-A29H-01	4	182470191	182859352	0.3641	-0.2808	Mosaic Loss
ACC	TCGA-OR-A5K8-01A-11D-A29H-01	4	190520857	190930894	0.0546	0.282	Inherited Duplication
ACC	TCGA-OR-A5K8-01A-11D-A29H-01	5	36344	180520810	0.1471	0.5833	Mosaic Gain
ACC	TCGA-OR-A5K8-01A-11D-A29H-01	5	180600875	180692833	0.1377	0.4085	Inherited Duplication
ACC	TCGA-OR-A5K8-01A-11D-A29H-01	6	165632	170905977	0.3955	-0.1501	Mosaic Loss
ACC	TCGA-OR-A5K8-01A-11D-A29H-01	7	159072828	159116965	0.0524	0.5446	Inherited Duplication
ACC	TCGA-OR-A5K8-01A-11D-A29H-01	8	113565	139285073	0.377	-0.2949	Mosaic Loss
ACC	TCGA-OR-A5K8-01A-11D-A29H-01	8	139613626	146235459	0.3614	-0.3872	Mosaic Loss
ACC	TCGA-OR-A5K8-01A-11D-A29H-01	11	230368	134900469	0.3785	-0.2612	Mosaic Loss
ACC	TCGA-OR-A5K8-01A-11D-A29H-01	13	19215674	115106996	0.4498	0.3051	Mosaic Gain
ACC	TCGA-OR-A5K8-01A-11D-A29H-01	14	55816925	107285437	0.3727	-0.2592	Mosaic Loss
ACC	TCGA-OR-A5K8-01A-11D-A29H-01	15	20071673	102400037	0.376	-0.2636	Mosaic Loss
ACC	TCGA-OR-A5K8-01A-11D-A29H-01	16	7638597	7789262	0.395	-0.2111	Mosaic Loss
ACC	TCGA-OR-A5K8-01A-11D-A29H-01	17	971097	81048659	0.3712	-0.2643	Mosaic Loss
ACC	TCGA-OR-A5K8-01A-11D-A29H-01	18	100949	78014582	0.3823	-0.255	Mosaic Loss
ACC	TCGA-OR-A5K8-01A-11D-A29H-01	21	15548798	48084820	0.3778	-0.2505	Mosaic Loss
ACC	TCGA-OR-A5K8-01A-11D-A29H-01	22	16055171	49829517	0.3679	-0.2887	Mosaic Loss
ACC	TCGA-OR-A5K8-01A-11D-A29H-01	22	50510258	51219006	0.3918	-0.342	Mosaic Loss
ACC	TCGA-OR-A5K9-01A-11D-A29H-01	1	752566	144849544	0.4182	-0.2467	Mosaic Loss
ACC	TCGA-OR-A5K9-01A-11D-A29H-01	2	189818	15912067	0.1507	-0.0052	Mosaic cnLOH
ACC	TCGA-OR-A5K9-01A-11D-A29H-01	2	16169350	59240639	0.3979	-0.2257	Mosaic Loss
ACC	TCGA-OR-A5K9-01A-11D-A29H-01	2	59745643	242662621	0.1515	0.0337	Mosaic cnLOH
ACC	TCGA-OR-A5K9-01A-11D-A29H-01	3	115856130	116983850	0.2944	-0.7488	Mosaic Loss
ACC	TCGA-OR-A5K9-01A-11D-A29H-01	4	888937	181987177	0.1527	0.0536	Mosaic Gain
ACC	TCGA-OR-A5K9-01A-11D-A29H-01	4	183248760	190930894	0.1441	0.0568	Mosaic Gain
ACC	TCGA-OR-A5K9-01A-11D-A29H-01	5	36344	1055879	0.2479	0.6485	Inherited Duplication
ACC	TCGA-OR-A5K9-01A-11D-A29H-01	5	1211556	16155116	0.4079	-0.3172	Mosaic Loss
ACC	TCGA-OR-A5K9-01A-11D-A29H-01	5	18783830	180692833	0.1573	0.0212	Mosaic cnLOH
ACC	TCGA-OR-A5K9-01A-11D-A29H-01	6	165632	170905977	0.1522	0.0367	Mosaic cnLOH
ACC	TCGA-OR-A5K9-01A-11D-A29H-01	7	44167	159116965	0.1512	0.0106	Mosaic cnLOH
ACC	TCGA-OR-A5K9-01A-11D-A29H-01	8	113565	3067724	0.219	0.2002	Mosaic Gain
ACC	TCGA-OR-A5K9-01A-11D-A29H-01	8	6473715	146293414	0.2278	0.1987	Mosaic Gain
ACC	TCGA-OR-A5K9-01A-11D-A29H-01	9	46587	449798	0.1147	0.0558	Mosaic Gain
ACC	TCGA-OR-A5K9-01A-11D-A29H-01	9	469245	141071475	0.1522	0.0389	Mosaic cnLOH
ACC	TCGA-OR-A5K9-01A-11D-A29H-01	10	104427	135434551	0.4536	0.0126	Mosaic cnLOH
ACC	TCGA-OR-A5K9-01A-11D-A29H-01	11	211447	134942626	0.4158	-0.2695	Mosaic Loss
ACC	TCGA-OR-A5K9-01A-11D-A29H-01	12	161382	133777645	0.161	0.0315	Mosaic cnLOH
ACC	TCGA-OR-A5K9-01A-11D-A29H-01	13	19045628	19554071	0.0539	-0.3053	Mosaic Loss
ACC	TCGA-OR-A5K9-01A-11D-A29H-01	13	114937294	115106996	0.0785	-0.2112	Mosaic Loss
ACC	TCGA-OR-A5K9-01A-11D-A29H-01	14	20211644	107285437	0.1504	0.0377	Mosaic cnLOH
ACC	TCGA-OR-A5K9-01A-11D-A29H-01	15	20071673	34233460	0.3191	-0.7274	Mosaic Loss
ACC	TCGA-OR-A5K9-01A-11D-A29H-01	15	34525588	46642263	0.3271	-0.676	Mosaic Loss
ACC	TCGA-OR-A5K9-01A-11D-A29H-01	16	1538692	71330606	0.1459	-0.0072	Mosaic cnLOH
ACC	TCGA-OR-A5K9-01A-11D-A29H-01	16	73653046	89866043	0.1474	0.0075	Mosaic cnLOH
ACC	TCGA-OR-A5K9-01A-11D-A29H-01	17	159851	71035613	0.4141	-0.263	Mosaic Loss
ACC	TCGA-OR-A5K9-01A-11D-A29H-01	17	71143527	81048659	0.396	-0.2755	Mosaic Loss
ACC	TCGA-OR-A5K9-01A-11D-A29H-01	18	100949	1884686	0.1472	0.0926	Inherited Duplication
ACC	TCGA-OR-A5K9-01A-11D-A29H-01	18	6940557	78014582	0.1513	0.0261	Mosaic cnLOH
ACC	TCGA-OR-A5K9-01A-11D-A29H-01	19	260912	10154826	0.2832	0.1668	Mosaic Gain
ACC	TCGA-OR-A5K9-01A-11D-A29H-01	19	15504766	16184052	0.1206	0.7023	Inherited Duplication
ACC	TCGA-OR-A5K9-01A-11D-A29H-01	19	18104155	59093464	0.2387	0.152	Mosaic Gain
ACC	TCGA-OR-A5K9-01A-11D-A29H-01	20	61795	23939277	0.3967	-0.2666	Mosaic Loss
ACC	TCGA-OR-A5K9-01A-11D-A29H-01	20	24004662	62903535	0.148	-0.0437	Mosaic cnLOH
ACC	TCGA-OR-A5K9-01A-11D-A29H-01	22	16425814	51219006	0.4059	-0.2869	Mosaic Loss
ACC	TCGA-OR-A5KB-01A-11D-A309-01	1	918573	220411970	0.1395	0.2838	Mosaic Gain
ACC	TCGA-OR-A5KB-01A-11D-A309-01	1	220989330	228184038	0.1539	0.4148	Mosaic Gain
ACC	TCGA-OR-A5KB-01A-11D-A309-01	1	228458973	249198692	0.1467	0.4289	Mosaic Gain
ACC	TCGA-OR-A5KB-01A-11D-A309-01	2	15703	142226298	0.1214	0.0055	Mosaic cnLOH
ACC	TCGA-OR-A5KB-01A-11D-A309-01	3	995511	94178735	0.325	-0.1014	Mosaic Loss
ACC	TCGA-OR-A5KB-01A-11D-A309-01	3	94247972	99231285	0.1269	0.0649	Mosaic Gain
ACC	TCGA-OR-A5KB-01A-11D-A309-01	3	99315838	174511328	0.1981	0.2012	Mosaic Gain
ACC	TCGA-OR-A5KB-01A-11D-A309-01	3	174814399	197808975	0.1962	0.1745	Mosaic Gain
ACC	TCGA-OR-A5KB-01A-11D-A309-01	4	61981	108387353	0.1223	0.0217	Mosaic cnLOH
ACC	TCGA-OR-A5KB-01A-11D-A309-01	4	108404139	126489421	0.2713	0.4313	Mosaic Gain
ACC	TCGA-OR-A5KB-01A-11D-A309-01	4	126683716	128761940	0.2971	0.5457	Mosaic Gain
ACC	TCGA-OR-A5KB-01A-11D-A309-01	5	45020531	165244680	0.1158	0.0539	Mosaic Gain
ACC	TCGA-OR-A5KB-01A-11D-A309-01	5	167528820	180115817	0.093	0.2849	Mosaic Gain
ACC	TCGA-OR-A5KB-01A-11D-A309-01	7	139776358	144886172	0.1555	0.4677	Mosaic Gain
ACC	TCGA-OR-A5KB-01A-11D-A309-01	8	1476193	1603043	0.1479	0.1246	Inherited Duplication
ACC	TCGA-OR-A5KB-01A-11D-A309-01	8	3795574	5269540	0.1922	-0.4745	Mosaic Loss
ACC	TCGA-OR-A5KB-01A-11D-A309-01	8	8587589	13590754	0.1963	0.1771	Mosaic Gain
ACC	TCGA-OR-A5KB-01A-11D-A309-01	8	17241090	17637674	0.1195	0.0442	Mosaic cnLOH
ACC	TCGA-OR-A5KB-01A-11D-A309-01	8	28794678	31475273	0.185	-0.5093	Mosaic Loss
ACC	TCGA-OR-A5KB-01A-11D-A309-01	8	33479496	41575439	0.1493	-0.1327	Mosaic Loss
ACC	TCGA-OR-A5KB-01A-11D-A309-01	8	48251154	63110766	0.0936	0.2992	Mosaic Gain
ACC	TCGA-OR-A5KB-01A-11D-A309-01	8	64708239	99009024	0.091	0.3073	Mosaic Gain
ACC	TCGA-OR-A5KB-01A-11D-A309-01	8	103113668	146293414	0.0912	0.2796	Mosaic Gain
ACC	TCGA-OR-A5KB-01A-11D-A309-01	9	46587	452926	0.3044	-0.2287	Mosaic Loss
ACC	TCGA-OR-A5KB-01A-11D-A309-01	9	740472	39182452	0.2927	-0.2058	Mosaic Loss
ACC	TCGA-OR-A5KB-01A-11D-A309-01	10	53404013	135434551	0.1303	0.2081	Mosaic Gain
ACC	TCGA-OR-A5KB-01A-11D-A309-01	11	211447	64278637	0.2963	-0.2126	Mosaic Loss
ACC	TCGA-OR-A5KB-01A-11D-A309-01	11	68231455	77239334	0.296	-0.2661	Mosaic Loss
ACC	TCGA-OR-A5KB-01A-11D-A309-01	11	78401625	81643773	0.3	-0.1785	Mosaic Loss
ACC	TCGA-OR-A5KB-01A-11D-A309-01	11	82294925	134942626	0.3005	-0.2087	Mosaic Loss
ACC	TCGA-OR-A5KB-01A-11D-A309-01	12	161382	133777645	0.3545	-0.0063	Mosaic cnLOH
ACC	TCGA-OR-A5KB-01A-11D-A309-01	13	19045628	27361591	0.2049	-0.45	Mosaic Loss
ACC	TCGA-OR-A5KB-01A-11D-A309-01	13	27374729	35898208	0.1949	-0.5088	Mosaic Loss
ACC	TCGA-OR-A5KB-01A-11D-A309-01	14	20426704	30641083	0.2997	-0.1949	Mosaic Loss
ACC	TCGA-OR-A5KB-01A-11D-A309-01	14	32310803	63528930	0.3045	-0.1527	Mosaic Loss
ACC	TCGA-OR-A5KB-01A-11D-A309-01	14	66299436	107285437	0.354	0.0109	Mosaic cnLOH
ACC	TCGA-OR-A5KB-01A-11D-A309-01	15	20071673	23782767	0.1814	0.1623	Mosaic Gain
ACC	TCGA-OR-A5KB-01A-11D-A309-01	15	24038093	102400037	0.1262	0.0113	Mosaic cnLOH
ACC	TCGA-OR-A5KB-01A-11D-A309-01	16	86671	75470277	0.1213	-0.0147	Mosaic cnLOH
ACC	TCGA-OR-A5KB-01A-11D-A309-01	17	110908	81048659	0.1203	-0.01	Mosaic cnLOH
ACC	TCGA-OR-A5KB-01A-11D-A309-01	18	100949	78014582	0.1216	0.0256	Mosaic cnLOH
ACC	TCGA-OR-A5KB-01A-11D-A309-01	19	260912	59082605	0.2942	-0.2613	Mosaic Loss
ACC	TCGA-OR-A5KB-01A-11D-A309-01	20	15659486	17654446	0.1389	-0.0105	Mosaic cnLOH
ACC	TCGA-OR-A5KB-01A-11D-A309-01	20	20823718	51924075	0.1341	-0.0237	Mosaic cnLOH
ACC	TCGA-OR-A5KB-01A-11D-A309-01	20	53623313	62912463	0.1366	-0.0025	Mosaic cnLOH
ACC	TCGA-OR-A5KB-01A-11D-A309-01	21	10962411	48084820	0.3949	0.1991	Mosaic Gain
ACC	TCGA-OR-A5KB-01A-11D-A309-01	22	16055171	36038076	0.3476	-0.01	Mosaic cnLOH
ACC	TCGA-OR-A5KB-01A-11D-A309-01	22	36548406	51219006	0.1189	-0.0188	Mosaic cnLOH
ACC	TCGA-OR-A5KO-01A-11D-A29H-01	1	1156131	249198692	0.4113	-0.2595	Mosaic Loss
ACC	TCGA-OR-A5KO-01A-11D-A29H-01	2	15703	243048760	0.4124	-0.2532	Mosaic Loss
ACC	TCGA-OR-A5KO-01A-11D-A29H-01	3	69244	197800244	0.4392	-0.0717	Mosaic Loss
ACC	TCGA-OR-A5KO-01A-11D-A29H-01	5	36344	19964364	0.1546	0.5294	Mosaic Gain
ACC	TCGA-OR-A5KO-01A-11D-A29H-01	6	104658245	109026566	0.4049	-0.184	Mosaic Loss
ACC	TCGA-OR-A5KO-01A-11D-A29H-01	6	110843888	111918794	0.4107	-0.2303	Mosaic Loss
ACC	TCGA-OR-A5KO-01A-11D-A29H-01	6	112628938	115168174	0.3719	-0.1505	Mosaic Loss
ACC	TCGA-OR-A5KO-01A-11D-A29H-01	6	117392771	118482161	0.4119	-0.2599	Mosaic Loss
ACC	TCGA-OR-A5KO-01A-11D-A29H-01	6	119009564	120284989	0.2576	0.0014	Mosaic cnLOH
ACC	TCGA-OR-A5KO-01A-11D-A29H-01	6	121600538	122967007	0.4032	-0.1293	Mosaic Loss
ACC	TCGA-OR-A5KO-01A-11D-A29H-01	6	123238708	139227575	0.4106	-0.1754	Mosaic Loss
ACC	TCGA-OR-A5KO-01A-11D-A29H-01	6	140079639	143468357	0.3911	-0.1065	Mosaic Loss
ACC	TCGA-OR-A5KO-01A-11D-A29H-01	6	143851294	144850993	0.4004	-0.1923	Mosaic Loss
ACC	TCGA-OR-A5KO-01A-11D-A29H-01	6	145376485	147685480	0.4121	0.0256	Mosaic cnLOH
ACC	TCGA-OR-A5KO-01A-11D-A29H-01	6	148236165	150247887	0.3959	-0.1213	Mosaic Loss
ACC	TCGA-OR-A5KO-01A-11D-A29H-01	6	150766205	153793947	0.4094	-0.1861	Mosaic Loss
ACC	TCGA-OR-A5KO-01A-11D-A29H-01	6	154145492	155986781	0.4178	-0.257	Mosaic Loss
ACC	TCGA-OR-A5KO-01A-11D-A29H-01	6	156588729	160455343	0.4124	-0.2209	Mosaic Loss
ACC	TCGA-OR-A5KO-01A-11D-A29H-01	6	160868327	165612858	0.4046	-0.2188	Mosaic Loss
ACC	TCGA-OR-A5KO-01A-11D-A29H-01	6	166348804	170905977	0.4093	-0.2618	Mosaic Loss
ACC	TCGA-OR-A5KO-01A-11D-A29H-01	7	44167	825786	0.0528	0.1852	Inherited Duplication
ACC	TCGA-OR-A5KO-01A-11D-A29H-01	9	38805319	141071475	0.1524	0.2765	Mosaic Gain
ACC	TCGA-OR-A5KO-01A-11D-A29H-01	10	104427	16016906	0.1728	0.4999	Mosaic Gain
ACC	TCGA-OR-A5KO-01A-11D-A29H-01	10	47628567	135434551	0.4326	-0.1238	Mosaic Loss
ACC	TCGA-OR-A5KO-01A-11D-A29H-01	11	211447	134942626	0.4093	-0.2519	Mosaic Loss
ACC	TCGA-OR-A5KO-01A-11D-A29H-01	12	161382	133777645	0.4104	-0.2679	Mosaic Loss
ACC	TCGA-OR-A5KO-01A-11D-A29H-01	13	19045628	115106996	0.4162	-0.2257	Mosaic Loss
ACC	TCGA-OR-A5KO-01A-11D-A29H-01	14	44814517	46227755	0.3746	-0.2169	Mosaic Loss
ACC	TCGA-OR-A5KO-01A-11D-A29H-01	15	22993882	102400037	0.4095	-0.257	Mosaic Loss
ACC	TCGA-OR-A5KO-01A-11D-A29H-01	16	86671	511080	0.0636	0.1213	Inherited Duplication
ACC	TCGA-OR-A5KO-01A-11D-A29H-01	16	5496373	6377499	0.4119	-0.298	Mosaic Loss
ACC	TCGA-OR-A5KO-01A-11D-A29H-01	16	86024104	86769299	0.3792	-0.1853	Mosaic Loss
ACC	TCGA-OR-A5KO-01A-11D-A29H-01	17	34276	15873150	0.408	-0.2224	Mosaic Loss
ACC	TCGA-OR-A5KO-01A-11D-A29H-01	17	16414787	81048659	0.4057	-0.2635	Mosaic Loss
ACC	TCGA-OR-A5KO-01A-11D-A29H-01	18	100949	78014582	0.4122	-0.2595	Mosaic Loss
ACC	TCGA-OR-A5KO-01A-11D-A29H-01	20	255240	62912463	0.406	-0.3036	Mosaic Loss
ACC	TCGA-OR-A5KO-01A-11D-A29H-01	21	10962411	48084820	0.4096	-0.249	Mosaic Loss
ACC	TCGA-OR-A5KO-01A-11D-A29H-01	22	16055171	51059118	0.4043	-0.2704	Mosaic Loss
ACC	TCGA-OR-A5KP-01A-11D-A309-01	1	761732	17286210	0.1315	0.0488	Mosaic cnLOH
ACC	TCGA-OR-A5KP-01A-11D-A309-01	1	31231254	248560741	0.138	0.0554	Mosaic Gain
ACC	TCGA-OR-A5KP-01A-11D-A309-01	3	69244	197808975	0.3433	-0.1857	Mosaic Loss
ACC	TCGA-OR-A5KP-01A-11D-A309-01	4	61981	190930894	0.1356	0.1016	Mosaic Gain
ACC	TCGA-OR-A5KP-01A-11D-A309-01	5	36344	180692833	0.136	0.0605	Mosaic Gain
ACC	TCGA-OR-A5KP-01A-11D-A309-01	6	165632	170905977	0.1361	0.0866	Mosaic Gain
ACC	TCGA-OR-A5KP-01A-11D-A309-01	7	44167	12925433	0.1339	0.0415	Mosaic cnLOH
ACC	TCGA-OR-A5KP-01A-11D-A309-01	7	13376857	159000871	0.1344	0.0553	Mosaic Gain
ACC	TCGA-OR-A5KP-01A-11D-A309-01	9	34151280	39182452	0.1463	0.0571	Mosaic Gain
ACC	TCGA-OR-A5KP-01A-11D-A309-01	10	104427	25161261	0.133	0.0654	Mosaic Gain
ACC	TCGA-OR-A5KP-01A-11D-A309-01	10	25811835	38237984	0.132	0.0502	Mosaic Gain
ACC	TCGA-OR-A5KP-01A-11D-A309-01	11	307036	134942626	0.1355	0.081	Mosaic Gain
ACC	TCGA-OR-A5KP-01A-11D-A309-01	12	161382	229347	0.0352	0.2027	Inherited Duplication
ACC	TCGA-OR-A5KP-01A-11D-A309-01	14	21388302	100356632	0.0931	0.1498	Mosaic Gain
ACC	TCGA-OR-A5KP-01A-11D-A309-01	14	101568230	107285437	0.107	0.1066	Mosaic Gain
ACC	TCGA-OR-A5KP-01A-11D-A309-01	15	20071673	83531468	0.3422	-0.1981	Mosaic Loss
ACC	TCGA-OR-A5KP-01A-11D-A309-01	15	84225129	102400037	0.3408	-0.2005	Mosaic Loss
ACC	TCGA-OR-A5KP-01A-11D-A309-01	16	86671	90158838	0.1351	0.0445	Mosaic cnLOH
ACC	TCGA-OR-A5KP-01A-11D-A309-01	17	38129097	78795555	0.1331	0.0256	Mosaic cnLOH
ACC	TCGA-OR-A5KP-01A-11D-A309-01	17	79532109	81048659	0.1458	0.013	Mosaic cnLOH
ACC	TCGA-OR-A5KP-01A-11D-A309-01	18	100949	78014582	0.339	-0.183	Mosaic Loss
ACC	TCGA-OR-A5KP-01A-11D-A309-01	20	102181	62911343	0.2662	-0.1854	Mosaic Loss
ACC	TCGA-OR-A5KP-01A-11D-A309-01	22	17189194	51219006	0.3405	-0.233	Mosaic Loss
ACC	TCGA-OR-A5KQ-01A-11D-A309-01	3	60050093	60335529	0.1561	-0.1615	Mosaic Loss
ACC	TCGA-OR-A5KQ-01A-11D-A309-01	9	303727	27610116	0.0838	0.1821	Mosaic Gain
ACC	TCGA-OR-A5KQ-01A-11D-A309-01	11	900809	47672743	0.4032	0.0397	Mosaic cnLOH
ACC	TCGA-OR-A5KQ-01A-11D-A309-01	14	58072894	107285437	0.0972	-0.1161	Mosaic Loss
ACC	TCGA-OR-A5KQ-01A-11D-A309-01	22	18310110	50966914	0.1508	-0.2311	Mosaic Loss
ACC	TCGA-OR-A5KS-01A-11D-A309-01	1	918573	245608819	0.4123	-0.1713	Mosaic Loss
ACC	TCGA-OR-A5KS-01A-11D-A309-01	1	246109564	249198692	0.3979	-0.241	Mosaic Loss
ACC	TCGA-OR-A5KS-01A-11D-A309-01	2	15703	243048760	0.4175	-0.1152	Mosaic Loss
ACC	TCGA-OR-A5KS-01A-11D-A309-01	3	69244	2743441	0.157	0.3563	Mosaic Gain
ACC	TCGA-OR-A5KS-01A-11D-A309-01	3	2836270	197808975	0.1528	0.2009	Mosaic Gain
ACC	TCGA-OR-A5KS-01A-11D-A309-01	4	61981	190930894	0.1536	0.2468	Mosaic Gain
ACC	TCGA-OR-A5KS-01A-11D-A309-01	5	36344	1984294	0.3225	-0.1175	Mosaic Loss
ACC	TCGA-OR-A5KS-01A-11D-A309-01	5	2604660	7796625	0.4098	-0.1911	Mosaic Loss
ACC	TCGA-OR-A5KS-01A-11D-A309-01	5	9603298	9942457	0.1325	0.5321	Inherited Duplication
ACC	TCGA-OR-A5KS-01A-11D-A309-01	5	10147918	11597666	0.4257	-0.209	Mosaic Loss
ACC	TCGA-OR-A5KS-01A-11D-A309-01	5	173060082	173794156	0.3505	0.0762	Mosaic Gain
ACC	TCGA-OR-A5KS-01A-11D-A309-01	6	233750	170905977	0.4184	-0.1092	Mosaic Loss
ACC	TCGA-OR-A5KS-01A-11D-A309-01	8	1692723	2063261	0.1621	0.4977	Inherited Duplication
ACC	TCGA-OR-A5KS-01A-11D-A309-01	9	101857	140710603	0.1494	0.1643	Mosaic Gain
ACC	TCGA-OR-A5KS-01A-11D-A309-01	10	104427	135434551	0.4116	-0.1629	Mosaic Loss
ACC	TCGA-OR-A5KS-01A-11D-A309-01	11	211447	134942626	0.4135	-0.1287	Mosaic Loss
ACC	TCGA-OR-A5KS-01A-11D-A309-01	13	19045628	115106996	0.3921	-0.2131	Mosaic Loss
ACC	TCGA-OR-A5KS-01A-11D-A309-01	14	20211644	107285437	0.4133	-0.132	Mosaic Loss
ACC	TCGA-OR-A5KS-01A-11D-A309-01	15	20071673	102364660	0.4127	-0.1703	Mosaic Loss
ACC	TCGA-OR-A5KS-01A-11D-A309-01	17	462323	81048659	0.3974	-0.2939	Mosaic Loss
ACC	TCGA-OR-A5KS-01A-11D-A309-01	18	100949	78014582	0.4162	-0.1023	Mosaic Loss
ACC	TCGA-OR-A5KS-01A-11D-A309-01	20	35861973	62912463	0.4016	-0.2901	Mosaic Loss
ACC	TCGA-OR-A5KS-01A-11D-A309-01	21	10962411	48084820	0.4132	-0.1308	Mosaic Loss
ACC	TCGA-OR-A5KS-01A-11D-A309-01	22	16055171	50672097	0.3939	-0.3356	Mosaic Loss
ACC	TCGA-OR-A5KT-01A-11D-A29H-01	1	236184355	244194239	0.189	-0.2317	Mosaic Loss
ACC	TCGA-OR-A5KT-01A-11D-A29H-01	1	245126093	249198692	0.1918	-0.265	Mosaic Loss
ACC	TCGA-OR-A5KT-01A-11D-A29H-01	5	7862926	8869185	0.2182	-0.1587	Mosaic Loss
ACC	TCGA-OR-A5KT-01A-11D-A29H-01	6	417727	57032882	0.2071	-0.1868	Mosaic Loss
ACC	TCGA-OR-A5KT-01A-11D-A29H-01	8	113565	15701883	0.2232	-0.2588	Mosaic Loss
ACC	TCGA-OR-A5KT-01A-11D-A29H-01	12	38743508	46545783	0.1036	-0.0248	Mosaic cnLOH
ACC	TCGA-OR-A5KT-01A-11D-A29H-01	12	47139555	61114484	0.2883	0.5822	Mosaic Gain
ACC	TCGA-OR-A5KT-01A-11D-A29H-01	12	61516127	74335356	0.3405	0.8716	Mosaic Gain
ACC	TCGA-OR-A5KT-01A-11D-A29H-01	12	82953480	84980011	0.3029	0.7292	Mosaic Gain
ACC	TCGA-OR-A5KT-01A-11D-A29H-01	12	85538620	133777645	0.0937	-0.1225	Mosaic Loss
ACC	TCGA-OR-A5KT-01A-11D-A29H-01	13	19045628	19626675	0.0596	-0.0586	Mosaic Loss
ACC	TCGA-OR-A5KT-01A-11D-A29H-01	17	88813	9672591	0.2191	-0.2415	Mosaic Loss
ACC	TCGA-OR-A5KT-01A-11D-A29H-01	17	40759937	53084790	0.2069	-0.2638	Mosaic Loss
ACC	TCGA-OR-A5KT-01A-11D-A29H-01	17	57565581	68555708	0.291	0.6719	Mosaic Gain
ACC	TCGA-OR-A5KT-01A-11D-A29H-01	18	218285	18611243	0.2146	-0.2648	Mosaic Loss
ACC	TCGA-OR-A5KT-01A-11D-A29H-01	19	24348925	30882535	0.1954	-0.3222	Mosaic Loss
ACC	TCGA-OR-A5KT-01A-11D-A29H-01	19	31792865	52011292	0.2063	-0.3139	Mosaic Loss
ACC	TCGA-OR-A5KU-01A-11D-A29H-01	1	761732	249198692	0.3635	-0.162	Mosaic Loss
ACC	TCGA-OR-A5KU-01A-11D-A29H-01	2	15703	242943283	0.3679	-0.1494	Mosaic Loss
ACC	TCGA-OR-A5KU-01A-11D-A29H-01	5	49623821	54873285	0.1084	0.5629	Mosaic Gain
ACC	TCGA-OR-A5KU-01A-11D-A29H-01	5	56151744	58261529	0.1022	0.5418	Mosaic Gain
ACC	TCGA-OR-A5KU-01A-11D-A29H-01	5	58704650	113880315	0.0961	0.551	Mosaic Gain
ACC	TCGA-OR-A5KU-01A-11D-A29H-01	5	116225708	143062646	0.0964	0.5282	Mosaic Gain
ACC	TCGA-OR-A5KU-01A-11D-A29H-01	5	144314363	167972825	0.0995	0.5222	Mosaic Gain
ACC	TCGA-OR-A5KU-01A-11D-A29H-01	5	169520897	172826291	0.0958	0.4545	Mosaic Gain
ACC	TCGA-OR-A5KU-01A-11D-A29H-01	5	177966921	179768398	0.0898	0.518	Inherited Duplication
ACC	TCGA-OR-A5KU-01A-11D-A29H-01	6	174769	170905977	0.3679	-0.1454	Mosaic Loss
ACC	TCGA-OR-A5KU-01A-11D-A29H-01	7	44167	1381654	0.125	0.1098	Inherited Duplication
ACC	TCGA-OR-A5KU-01A-11D-A29H-01	7	1614261	159116965	0.1374	0.1236	Mosaic Gain
ACC	TCGA-OR-A5KU-01A-11D-A29H-01	8	113565	145569535	0.1346	0.104	Mosaic Gain
ACC	TCGA-OR-A5KU-01A-11D-A29H-01	9	245752	141071475	0.3637	-0.1435	Mosaic Loss
ACC	TCGA-OR-A5KU-01A-11D-A29H-01	10	104427	135434551	0.3624	-0.1451	Mosaic Loss
ACC	TCGA-OR-A5KU-01A-11D-A29H-01	11	211447	134942626	0.3669	-0.1471	Mosaic Loss
ACC	TCGA-OR-A5KU-01A-11D-A29H-01	13	19523949	115106996	0.279	-0.5502	Mosaic Loss
ACC	TCGA-OR-A5KU-01A-11D-A29H-01	14	20211644	101209973	0.3648	-0.1396	Mosaic Loss
ACC	TCGA-OR-A5KU-01A-11D-A29H-01	14	101568463	107285437	0.3559	-0.1533	Mosaic Loss
ACC	TCGA-OR-A5KU-01A-11D-A29H-01	15	20071673	102388692	0.1365	0.1365	Mosaic Gain
ACC	TCGA-OR-A5KU-01A-11D-A29H-01	16	31523113	90163275	0.1407	0.1153	Mosaic Gain
ACC	TCGA-OR-A5KU-01A-11D-A29H-01	17	6689	755120	0.3624	-0.064	Mosaic Loss
ACC	TCGA-OR-A5KU-01A-11D-A29H-01	17	833790	81048659	0.3878	0.0154	Mosaic cnLOH
ACC	TCGA-OR-A5KU-01A-11D-A29H-01	18	100949	78014582	0.3663	-0.1486	Mosaic Loss
ACC	TCGA-OR-A5KU-01A-11D-A29H-01	21	15331478	48084820	0.2662	0.5378	Mosaic Gain
ACC	TCGA-OR-A5KU-01A-11D-A29H-01	22	16055171	51105556	0.3487	-0.166	Mosaic Loss
ACC	TCGA-OR-A5KV-01A-11D-A29H-01	11	838110	49669326	0.4458	-0.0077	Mosaic cnLOH
ACC	TCGA-OR-A5KW-01A-11D-A29H-01	1	918573	41160204	0.4046	-0.1595	Mosaic Loss
ACC	TCGA-OR-A5KW-01A-11D-A29H-01	1	41398439	249198692	0.4098	-0.1867	Mosaic Loss
ACC	TCGA-OR-A5KW-01A-11D-A29H-01	2	15703	243048760	0.4168	-0.14	Mosaic Loss
ACC	TCGA-OR-A5KW-01A-11D-A29H-01	3	69244	197750722	0.4115	-0.1718	Mosaic Loss
ACC	TCGA-OR-A5KW-01A-11D-A29H-01	4	129239583	190771349	0.4122	-0.1577	Mosaic Loss
ACC	TCGA-OR-A5KW-01A-11D-A29H-01	5	1370300	25480023	0.4014	-0.202	Mosaic Loss
ACC	TCGA-OR-A5KW-01A-11D-A29H-01	5	26788362	26900903	0.4007	-0.1634	Mosaic Loss
ACC	TCGA-OR-A5KW-01A-11D-A29H-01	5	27252466	29515854	0.4054	-0.1298	Mosaic Loss
ACC	TCGA-OR-A5KW-01A-11D-A29H-01	6	531112	170756443	0.4126	-0.1669	Mosaic Loss
ACC	TCGA-OR-A5KW-01A-11D-A29H-01	9	192129	141071475	0.4104	-0.164	Mosaic Loss
ACC	TCGA-OR-A5KW-01A-11D-A29H-01	10	104427	135434551	0.3514	-0.1646	Mosaic Loss
ACC	TCGA-OR-A5KW-01A-11D-A29H-01	11	211447	134942626	0.4114	-0.172	Mosaic Loss
ACC	TCGA-OR-A5KW-01A-11D-A29H-01	14	20332571	25776613	0.1704	0.5591	Mosaic Gain
ACC	TCGA-OR-A5KW-01A-11D-A29H-01	14	25946473	76818989	0.4132	-0.1627	Mosaic Loss
ACC	TCGA-OR-A5KW-01A-11D-A29H-01	14	77106456	107285437	0.3925	-0.0685	Mosaic Loss
ACC	TCGA-OR-A5KW-01A-11D-A29H-01	17	6689	81048659	0.4049	-0.172	Mosaic Loss
ACC	TCGA-OR-A5KW-01A-11D-A29H-01	18	100949	77737397	0.4161	-0.1266	Mosaic Loss
ACC	TCGA-OR-A5KW-01A-11D-A29H-01	19	23661596	43412532	0.3982	-0.1869	Mosaic Loss
ACC	TCGA-OR-A5KW-01A-11D-A29H-01	19	48709127	54092622	0.2008	0.7204	Mosaic Gain
ACC	TCGA-OR-A5KW-01A-11D-A29H-01	19	58573559	59093464	0.402	-0.2049	Mosaic Loss
ACC	TCGA-OR-A5KW-01A-11D-A29H-01	20	61795	62912463	0.347	-0.2122	Mosaic Loss
ACC	TCGA-OR-A5KW-01A-11D-A29H-01	22	17257198	51150473	0.4022	-0.184	Mosaic Loss
ACC	TCGA-OR-A5KX-01A-11D-A29H-01	1	947034	121213287	0.148	-0.2057	Mosaic Loss
ACC	TCGA-OR-A5KX-01A-11D-A29H-01	1	145605318	249198692	0.24	-0.0047	Mosaic cnLOH
ACC	TCGA-OR-A5KX-01A-11D-A29H-01	2	15703	59559857	0.1477	-0.2258	Mosaic Loss
ACC	TCGA-OR-A5KX-01A-11D-A29H-01	2	59694749	84182537	0.3253	0.2908	Mosaic Gain
ACC	TCGA-OR-A5KX-01A-11D-A29H-01	2	84343393	88629360	0.1475	-0.2115	Mosaic Loss
ACC	TCGA-OR-A5KX-01A-11D-A29H-01	2	112373842	243048760	0.1647	0.3553	Mosaic Gain
ACC	TCGA-OR-A5KX-01A-11D-A29H-01	4	182197741	182931973	0.1305	-0.2262	Mosaic Loss
ACC	TCGA-OR-A5KX-01A-11D-A29H-01	5	36344	25190282	0.3797	-0.4153	Mosaic Loss
ACC	TCGA-OR-A5KX-01A-11D-A29H-01	5	25463696	30907892	0.2887	0.0967	Mosaic Gain
ACC	TCGA-OR-A5KX-01A-11D-A29H-01	5	31630012	36452799	0.3636	1.149	Mosaic Gain
ACC	TCGA-OR-A5KX-01A-11D-A29H-01	5	38008042	40136753	0.1077	0.1865	Mosaic Gain
ACC	TCGA-OR-A5KX-01A-11D-A29H-01	7	105278201	106008197	0.1593	0.3022	Inherited Duplication
ACC	TCGA-OR-A5KX-01A-11D-A29H-01	8	113565	42367880	0.3671	-0.3528	Mosaic Loss
ACC	TCGA-OR-A5KX-01A-11D-A29H-01	9	131960107	141071475	0.2006	0.3813	Mosaic Gain
ACC	TCGA-OR-A5KX-01A-11D-A29H-01	12	39565758	54114129	0.1139	0.1701	Mosaic Gain
ACC	TCGA-OR-A5KX-01A-11D-A29H-01	12	57377347	75484875	0.3024	0.8425	Mosaic Gain
ACC	TCGA-OR-A5KX-01A-11D-A29H-01	12	84940541	91220774	0.1191	0.2209	Mosaic Gain
ACC	TCGA-OR-A5KX-01A-11D-A29H-01	12	93693515	94475435	0.1005	0.153	Inherited Duplication
ACC	TCGA-OR-A5KX-01A-11D-A29H-01	12	95237458	105549209	0.1087	0.1887	Mosaic Gain
ACC	TCGA-OR-A5KX-01A-11D-A29H-01	12	106653608	110382489	0.098	0.1429	Mosaic Gain
ACC	TCGA-OR-A5KX-01A-11D-A29H-01	12	115290862	128313673	0.1002	0.1389	Mosaic Gain
ACC	TCGA-OR-A5KX-01A-11D-A29H-01	12	130629811	133380976	0.1114	0.148	Mosaic Gain
ACC	TCGA-OR-A5KX-01A-11D-A29H-01	14	20516355	50847107	0.1803	0.373	Mosaic Gain
ACC	TCGA-OR-A5KX-01A-11D-A29H-01	15	22351239	102400037	0.1492	-0.2284	Mosaic Loss
ACC	TCGA-OR-A5KX-01A-11D-A29H-01	16	86671	369384	0.0613	-0.1152	Mosaic Loss
ACC	TCGA-OR-A5KX-01A-11D-A29H-01	17	38924	15248353	0.3866	-0.4946	Mosaic Loss
ACC	TCGA-OR-A5KX-01A-11D-A29H-01	19	2242829	59093464	0.1938	0.2397	Mosaic Gain
ACC	TCGA-OR-A5KX-01A-11D-A29H-01	20	61795	62912463	0.159	0.2685	Mosaic Gain
ACC	TCGA-OR-A5KX-01A-11D-A29H-01	21	10962411	48084820	0.1551	0.2791	Mosaic Gain
ACC	TCGA-OR-A5KX-01A-11D-A29H-01	22	18135912	51024624	0.3678	-0.5361	Mosaic Loss
ACC	TCGA-OR-A5KY-01A-11D-A29H-01	1	798959	249198692	0.3586	-0.0516	Mosaic Loss
ACC	TCGA-OR-A5KY-01A-11D-A29H-01	2	15703	243048760	0.357	-0.0479	Mosaic cnLOH
ACC	TCGA-OR-A5KY-01A-11D-A29H-01	3	69244	197808975	0.3563	-0.0442	Mosaic cnLOH
ACC	TCGA-OR-A5KY-01A-11D-A29H-01	4	61981	190930894	0.3554	-0.0397	Mosaic cnLOH
ACC	TCGA-OR-A5KY-01A-11D-A29H-01	5	36344	180692833	0.1755	0.1113	Mosaic Gain
ACC	TCGA-OR-A5KY-01A-11D-A29H-01	6	165632	485620	0.3324	-0.119	Mosaic Loss
ACC	TCGA-OR-A5KY-01A-11D-A29H-01	6	551352	170905977	0.3567	-0.0461	Mosaic cnLOH
ACC	TCGA-OR-A5KY-01A-11D-A29H-01	7	44167	109218	0.127	-0.0324	Mosaic cnLOH
ACC	TCGA-OR-A5KY-01A-11D-A29H-01	7	1090396	159116965	0.1253	0.1417	Mosaic Gain
ACC	TCGA-OR-A5KY-01A-11D-A29H-01	8	113565	2025669	0.3506	-0.0499	Mosaic cnLOH
ACC	TCGA-OR-A5KY-01A-11D-A29H-01	8	2063261	145569535	0.3534	-0.0948	Mosaic Loss
ACC	TCGA-OR-A5KY-01A-11D-A29H-01	10	244561	135434551	0.1397	0.1938	Mosaic Gain
ACC	TCGA-OR-A5KY-01A-11D-A29H-01	11	211447	134942626	0.3534	-0.0512	Mosaic Loss
ACC	TCGA-OR-A5KY-01A-11D-A29H-01	12	161382	133777645	0.2101	0.3421	Mosaic Gain
ACC	TCGA-OR-A5KY-01A-11D-A29H-01	13	19045628	115106996	0.3625	-0.01	Mosaic cnLOH
ACC	TCGA-OR-A5KY-01A-11D-A29H-01	14	20211644	107285437	0.3517	-0.0267	Mosaic cnLOH
ACC	TCGA-OR-A5KY-01A-11D-A29H-01	15	20071673	102400037	0.3563	-0.054	Mosaic Loss
ACC	TCGA-OR-A5KY-01A-11D-A29H-01	16	86671	652941	0.1039	0.1161	Inherited Duplication
ACC	TCGA-OR-A5KY-01A-11D-A29H-01	16	3282605	83910506	0.1309	0.1527	Mosaic Gain
ACC	TCGA-OR-A5KY-01A-11D-A29H-01	16	84339892	84934018	0.1341	0.1446	Inherited Duplication
ACC	TCGA-OR-A5KY-01A-11D-A29H-01	16	85827400	90163275	0.1346	0.1542	Mosaic Gain
ACC	TCGA-OR-A5KY-01A-11D-A29H-01	17	6689	17254274	0.3625	-0.0018	Mosaic cnLOH
ACC	TCGA-OR-A5KY-01A-11D-A29H-01	17	17515891	81048659	0.3489	-0.0862	Mosaic Loss
ACC	TCGA-OR-A5KY-01A-11D-A29H-01	18	100949	78014582	0.3517	-0.0732	Mosaic Loss
ACC	TCGA-OR-A5KY-01A-11D-A29H-01	19	260912	865406	0.1698	0.2485	Inherited Duplication
ACC	TCGA-OR-A5KY-01A-11D-A29H-01	19	1364306	17910639	0.1328	0.171	Mosaic Gain
ACC	TCGA-OR-A5KY-01A-11D-A29H-01	19	57748048	59093464	0.0736	0.4242	Inherited Duplication
ACC	TCGA-OR-A5KY-01A-11D-A29H-01	20	61795	6886999	0.1716	0.1048	Mosaic Gain
ACC	TCGA-OR-A5KY-01A-11D-A29H-01	20	6922046	59455845	0.1751	0.0988	Mosaic Gain
ACC	TCGA-OR-A5KY-01A-11D-A29H-01	20	59536227	62912463	0.1731	0.1052	Mosaic Gain
ACC	TCGA-OR-A5KY-01A-11D-A29H-01	21	10962411	48084820	0.1368	0.1987	Mosaic Gain
ACC	TCGA-OR-A5KY-01A-11D-A29H-01	22	16055171	51219006	0.352	-0.0539	Mosaic Loss
ACC	TCGA-OR-A5KZ-01A-11D-A29H-01	1	1647686	249198692	0.4466	-0.0445	Mosaic cnLOH
ACC	TCGA-OR-A5KZ-01A-11D-A29H-01	2	15703	39341148	0.4475	-0.0338	Mosaic cnLOH
ACC	TCGA-OR-A5KZ-01A-11D-A29H-01	2	39529876	243048760	0.4507	-0.0156	Mosaic cnLOH
ACC	TCGA-OR-A5KZ-01A-11D-A29H-01	3	69244	197808975	0.4498	-0.0133	Mosaic cnLOH
ACC	TCGA-OR-A5KZ-01A-11D-A29H-01	4	61981	181289100	0.459	0.0678	Mosaic Gain
ACC	TCGA-OR-A5KZ-01A-11D-A29H-01	4	181797596	190930894	0.4714	0.2104	Mosaic Gain
ACC	TCGA-OR-A5KZ-01A-11D-A29H-01	5	36344	659605	0.136	0.199	Inherited Duplication
ACC	TCGA-OR-A5KZ-01A-11D-A29H-01	6	165632	166368450	0.1628	0.3215	Mosaic Gain
ACC	TCGA-OR-A5KZ-01A-11D-A29H-01	6	166411389	170905977	0.1556	0.2586	Mosaic Gain
ACC	TCGA-OR-A5KZ-01A-11D-A29H-01	7	44167	112678432	0.1395	0.2424	Mosaic Gain
ACC	TCGA-OR-A5KZ-01A-11D-A29H-01	7	112987650	125978307	0.1399	0.2765	Mosaic Gain
ACC	TCGA-OR-A5KZ-01A-11D-A29H-01	7	126077705	159116965	0.1343	0.218	Mosaic Gain
ACC	TCGA-OR-A5KZ-01A-11D-A29H-01	8	113565	17687955	0.1214	0.2343	Mosaic Gain
ACC	TCGA-OR-A5KZ-01A-11D-A29H-01	9	217397	141071475	0.4374	-0.0736	Mosaic Loss
ACC	TCGA-OR-A5KZ-01A-11D-A29H-01	10	104427	135434551	0.4471	-0.0257	Mosaic cnLOH
ACC	TCGA-OR-A5KZ-01A-11D-A29H-01	11	211447	134942626	0.4477	-0.0241	Mosaic cnLOH
ACC	TCGA-OR-A5KZ-01A-11D-A29H-01	12	161382	116179267	0.1616	0.3107	Mosaic Gain
ACC	TCGA-OR-A5KZ-01A-11D-A29H-01	12	116197943	130733050	0.1589	0.2589	Mosaic Gain
ACC	TCGA-OR-A5KZ-01A-11D-A29H-01	12	130752632	133777645	0.1611	0.276	Mosaic Gain
ACC	TCGA-OR-A5KZ-01A-11D-A29H-01	13	19045628	115106996	0.3743	-0.5169	Mosaic Loss
ACC	TCGA-OR-A5KZ-01A-11D-A29H-01	14	20211644	20473910	0.0788	-0.1762	Mosaic Loss
ACC	TCGA-OR-A5KZ-01A-11D-A29H-01	14	20960010	23216088	0.0898	-0.0923	Mosaic Loss
ACC	TCGA-OR-A5KZ-01A-11D-A29H-01	14	26089129	27451063	0.1	-0.1149	Mosaic Loss
ACC	TCGA-OR-A5KZ-01A-11D-A29H-01	14	30048183	43187976	0.0927	-0.1365	Mosaic Loss
ACC	TCGA-OR-A5KZ-01A-11D-A29H-01	14	46637981	56731131	0.0856	-0.1393	Mosaic Loss
ACC	TCGA-OR-A5KZ-01A-11D-A29H-01	14	59051142	61613506	0.0757	-0.1377	Mosaic Loss
ACC	TCGA-OR-A5KZ-01A-11D-A29H-01	14	64617126	73990117	0.0851	-0.149	Mosaic Loss
ACC	TCGA-OR-A5KZ-01A-11D-A29H-01	14	77533223	80669929	0.0864	-0.1728	Mosaic Loss
ACC	TCGA-OR-A5KZ-01A-11D-A29H-01	14	84899437	89587920	0.0809	-0.1187	Mosaic Loss
ACC	TCGA-OR-A5KZ-01A-11D-A29H-01	14	91795056	107285437	0.0833	-0.1703	Mosaic Loss
ACC	TCGA-OR-A5KZ-01A-11D-A29H-01	15	20071673	26719965	0.1536	0.2713	Mosaic Gain
ACC	TCGA-OR-A5KZ-01A-11D-A29H-01	16	86671	78842436	0.1123	0.1617	Mosaic Gain
ACC	TCGA-OR-A5KZ-01A-11D-A29H-01	16	79194524	90163275	0.1116	0.1635	Mosaic Gain
ACC	TCGA-OR-A5KZ-01A-11D-A29H-01	17	6689	7944609	0.4466	-0.0195	Mosaic cnLOH
ACC	TCGA-OR-A5KZ-01A-11D-A29H-01	17	8038634	81048659	0.4439	-0.0379	Mosaic cnLOH
ACC	TCGA-OR-A5KZ-01A-11D-A29H-01	18	100949	77876701	0.4498	-0.0171	Mosaic cnLOH
ACC	TCGA-OR-A5KZ-01A-11D-A29H-01	21	15885274	48050388	0.0981	0.1573	Mosaic Gain
ACC	TCGA-OR-A5KZ-01A-11D-A29H-01	22	17149033	51219006	0.4303	-0.1326	Mosaic Loss
ACC	TCGA-OR-A5L1-01A-11D-A309-01	1	949608	249198692	0.4009	-0.1436	Mosaic Loss
ACC	TCGA-OR-A5L1-01A-11D-A309-01	2	15703	243014630	0.4033	-0.1128	Mosaic Loss
ACC	TCGA-OR-A5L1-01A-11D-A309-01	4	182094811	182376310	0.1048	0.289	Inherited Duplication
ACC	TCGA-OR-A5L1-01A-11D-A309-01	6	467414	170905977	0.4022	-0.1108	Mosaic Loss
ACC	TCGA-OR-A5L1-01A-11D-A309-01	7	44167	159116965	0.1481	0.1477	Mosaic Gain
ACC	TCGA-OR-A5L1-01A-11D-A309-01	8	113565	146293414	0.1492	0.1321	Mosaic Gain
ACC	TCGA-OR-A5L1-01A-11D-A309-01	9	46587	140952916	0.1504	0.1701	Mosaic Gain
ACC	TCGA-OR-A5L1-01A-11D-A309-01	11	221584	134938470	0.4016	-0.1162	Mosaic Loss
ACC	TCGA-OR-A5L1-01A-11D-A309-01	13	19212262	115106996	0.307	-0.487	Mosaic Loss
ACC	TCGA-OR-A5L1-01A-11D-A309-01	14	20211644	107276949	0.3996	-0.1182	Mosaic Loss
ACC	TCGA-OR-A5L1-01A-11D-A309-01	17	114669	81048659	0.395	-0.1723	Mosaic Loss
ACC	TCGA-OR-A5L1-01A-11D-A309-01	18	100949	78014582	0.449	0.1766	Mosaic Gain
ACC	TCGA-OR-A5L1-01A-11D-A309-01	22	17065079	51219006	0.3947	-0.1874	Mosaic Loss
ACC	TCGA-OR-A5L2-01A-11D-A309-01	1	761732	249198692	0.2206	-0.1131	Mosaic Loss
ACC	TCGA-OR-A5L2-01A-11D-A309-01	2	15703	4704141	0.2003	-0.1692	Mosaic Loss
ACC	TCGA-OR-A5L2-01A-11D-A309-01	2	5715190	33942066	0.1126	-0.0608	Mosaic Loss
ACC	TCGA-OR-A5L2-01A-11D-A309-01	2	34185660	241253860	0.2211	0.043	Mosaic cnLOH
ACC	TCGA-OR-A5L2-01A-11D-A309-01	2	241865616	243048760	0.1487	-0.3622	Mosaic Loss
ACC	TCGA-OR-A5L2-01A-11D-A309-01	3	69244	197808975	0.3018	0.1635	Mosaic Gain
ACC	TCGA-OR-A5L2-01A-11D-A309-01	4	61981	420664	0.196	0.0441	Mosaic cnLOH
ACC	TCGA-OR-A5L2-01A-11D-A309-01	4	2385312	14678381	0.1272	-0.0251	Mosaic cnLOH
ACC	TCGA-OR-A5L2-01A-11D-A309-01	4	17068588	37529862	0.2014	0.7092	Mosaic Gain
ACC	TCGA-OR-A5L2-01A-11D-A309-01	4	110904448	113251247	0.1052	0.031	Mosaic cnLOH
ACC	TCGA-OR-A5L2-01A-11D-A309-01	4	145433452	150724258	0.0929	0.0638	Mosaic Gain
ACC	TCGA-OR-A5L2-01A-11D-A309-01	4	162495423	190637295	0.1188	-0.1988	Mosaic Loss
ACC	TCGA-OR-A5L2-01A-11D-A309-01	5	412694	52443843	0.1845	0.02	Mosaic cnLOH
ACC	TCGA-OR-A5L2-01A-11D-A309-01	5	63049105	64417678	0.0986	0.2513	Inherited Duplication
ACC	TCGA-OR-A5L2-01A-11D-A309-01	5	77890217	78628233	0.0829	-0.1583	Mosaic Loss
ACC	TCGA-OR-A5L2-01A-11D-A309-01	5	84189027	87256806	0.1085	-0.0569	Mosaic Loss
ACC	TCGA-OR-A5L2-01A-11D-A309-01	5	87865365	97210613	0.2529	0.0621	Mosaic Gain
ACC	TCGA-OR-A5L2-01A-11D-A309-01	5	98978212	115495863	0.249	0.0152	Mosaic cnLOH
ACC	TCGA-OR-A5L2-01A-11D-A309-01	5	115962951	180692833	0.2372	-0.0741	Mosaic Loss
ACC	TCGA-OR-A5L2-01A-11D-A309-01	6	165632	170905977	0.2253	-0.0658	Mosaic Loss
ACC	TCGA-OR-A5L2-01A-11D-A309-01	7	44167	859610	0.0964	-0.0099	Mosaic Subtle
ACC	TCGA-OR-A5L2-01A-11D-A309-01	7	70696000	82473388	0.1451	0.1454	Mosaic Gain
ACC	TCGA-OR-A5L2-01A-11D-A309-01	7	82784017	154145593	0.1921	0.1473	Mosaic Gain
ACC	TCGA-OR-A5L2-01A-11D-A309-01	8	184319	146293414	0.2788	0.0527	Mosaic Gain
ACC	TCGA-OR-A5L2-01A-11D-A309-01	9	46587	19760153	0.2363	0.0118	Mosaic cnLOH
ACC	TCGA-OR-A5L2-01A-11D-A309-01	9	26605498	140720117	0.1351	0.041	Mosaic cnLOH
ACC	TCGA-OR-A5L2-01A-11D-A309-01	10	29500010	35205642	0.1272	0.1666	Mosaic Gain
ACC	TCGA-OR-A5L2-01A-11D-A309-01	10	35567127	135284115	0.2108	-0.1056	Mosaic Loss
ACC	TCGA-OR-A5L2-01A-11D-A309-01	11	8254503	25846581	0.103	0.1438	Mosaic Gain
ACC	TCGA-OR-A5L2-01A-11D-A309-01	11	29061816	57339361	0.1122	0.1878	Mosaic Gain
ACC	TCGA-OR-A5L2-01A-11D-A309-01	11	65537556	76691264	0.263	0.5363	Mosaic Gain
ACC	TCGA-OR-A5L2-01A-11D-A309-01	11	134482466	134942626	0.1214	-0.044	Mosaic cnLOH
ACC	TCGA-OR-A5L2-01A-11D-A309-01	12	161382	29851719	0.1307	0.092	Mosaic Gain
ACC	TCGA-OR-A5L2-01A-11D-A309-01	12	29877464	45290466	0.2087	0.3258	Mosaic Gain
ACC	TCGA-OR-A5L2-01A-11D-A309-01	12	46363027	68894843	0.1278	0.0829	Mosaic Gain
ACC	TCGA-OR-A5L2-01A-11D-A309-01	12	69619736	121488876	0.1984	0.1432	Mosaic Gain
ACC	TCGA-OR-A5L2-01A-11D-A309-01	12	122290439	133777645	0.1383	0.1679	Mosaic Gain
ACC	TCGA-OR-A5L2-01A-11D-A309-01	13	19045628	84957873	0.1632	-0.1883	Mosaic Loss
ACC	TCGA-OR-A5L2-01A-11D-A309-01	13	94996634	115106996	0.19	-0.1618	Mosaic Loss
ACC	TCGA-OR-A5L2-01A-11D-A309-01	14	20211644	107285437	0.2254	0.1367	Mosaic Gain
ACC	TCGA-OR-A5L2-01A-11D-A309-01	15	20071673	40714019	0.2073	-0.1173	Mosaic Loss
ACC	TCGA-OR-A5L2-01A-11D-A309-01	15	78256258	79976755	0.1104	0.3038	Inherited Duplication
ACC	TCGA-OR-A5L2-01A-11D-A309-01	15	91772565	101932046	0.1072	0.371	Mosaic Gain
ACC	TCGA-OR-A5L2-01A-11D-A309-01	16	1817431	31603772	0.1887	0.0135	Mosaic cnLOH
ACC	TCGA-OR-A5L2-01A-11D-A309-01	16	62610317	73555110	0.1839	0.235	Mosaic Gain
ACC	TCGA-OR-A5L2-01A-11D-A309-01	16	83408717	84590776	0.1298	-0.0696	Mosaic Loss
ACC	TCGA-OR-A5L2-01A-11D-A309-01	17	32460717	57969625	0.0938	0.1053	Mosaic Gain
ACC	TCGA-OR-A5L2-01A-11D-A309-01	18	10627133	28606778	0.1224	0.179	Mosaic Gain
ACC	TCGA-OR-A5L2-01A-11D-A309-01	19	20926751	30756075	0.1071	0.1091	Mosaic Gain
ACC	TCGA-OR-A5L2-01A-11D-A309-01	19	57198749	59093464	0.1364	-0.3788	Mosaic Loss
ACC	TCGA-OR-A5L2-01A-11D-A309-01	20	61795	6457839	0.1355	0.019	Mosaic cnLOH
ACC	TCGA-OR-A5L2-01A-11D-A309-01	20	42172112	56334060	0.0997	0.0888	Mosaic Gain
ACC	TCGA-OR-A5L2-01A-11D-A309-01	22	17467474	51219006	0.3251	0.172	Mosaic Gain
ACC	TCGA-OR-A5L3-01A-11D-A29H-01	1	5048715	62911751	0.31	-0.368	Mosaic Loss
ACC	TCGA-OR-A5L3-01A-11D-A29H-01	9	307197	38994130	0.3155	-0.3664	Mosaic Loss
ACC	TCGA-OR-A5L3-01A-11D-A29H-01	19	40100130	48282316	0.2963	-0.3805	Mosaic Loss
ACC	TCGA-OR-A5L4-01A-11D-A29H-01	1	1297065	249198692	0.3716	-0.1445	Mosaic Loss
ACC	TCGA-OR-A5L4-01A-11D-A29H-01	2	15703	243048760	0.3712	-0.1313	Mosaic Loss
ACC	TCGA-OR-A5L4-01A-11D-A29H-01	3	69244	197808975	0.3725	-0.1318	Mosaic Loss
ACC	TCGA-OR-A5L4-01A-11D-A29H-01	4	61981	190930894	0.3746	-0.1245	Mosaic Loss
ACC	TCGA-OR-A5L4-01A-11D-A29H-01	5	180579462	180692833	0.0843	0.1719	Inherited Duplication
ACC	TCGA-OR-A5L4-01A-11D-A29H-01	6	165632	170905977	0.1421	0.1573	Mosaic Gain
ACC	TCGA-OR-A5L4-01A-11D-A29H-01	8	194884	146293414	0.368	-0.1763	Mosaic Loss
ACC	TCGA-OR-A5L4-01A-11D-A29H-01	9	46587	141071475	0.3721	-0.1223	Mosaic Loss
ACC	TCGA-OR-A5L4-01A-11D-A29H-01	10	104427	135434551	0.3694	-0.123	Mosaic Loss
ACC	TCGA-OR-A5L4-01A-11D-A29H-01	11	211447	134938470	0.372	-0.1301	Mosaic Loss
ACC	TCGA-OR-A5L4-01A-11D-A29H-01	13	19260565	115045259	0.3765	-0.1111	Mosaic Loss
ACC	TCGA-OR-A5L4-01A-11D-A29H-01	15	22351239	102120895	0.369	-0.1278	Mosaic Loss
ACC	TCGA-OR-A5L4-01A-11D-A29H-01	17	34276	81048659	0.3666	-0.1202	Mosaic Loss
ACC	TCGA-OR-A5L4-01A-11D-A29H-01	18	100949	77984345	0.3732	-0.1268	Mosaic Loss
ACC	TCGA-OR-A5L4-01A-11D-A29H-01	21	14540019	48084820	0.3713	-0.1284	Mosaic Loss
ACC	TCGA-OR-A5L4-01A-11D-A29H-01	22	16055171	51219006	0.3648	-0.1247	Mosaic Loss
ACC	TCGA-OR-A5L5-01A-11D-A29H-01	1	918573	249198692	0.2502	-0.0569	Mosaic Loss
ACC	TCGA-OR-A5L5-01A-11D-A29H-01	2	15703	243048760	0.2543	-0.0389	Mosaic cnLOH
ACC	TCGA-OR-A5L5-01A-11D-A29H-01	3	69244	197808975	0.2523	-0.0411	Mosaic cnLOH
ACC	TCGA-OR-A5L5-01A-11D-A29H-01	4	61981	190930894	0.2561	-0.0234	Mosaic cnLOH
ACC	TCGA-OR-A5L5-01A-11D-A29H-01	6	186221	170905977	0.2497	-0.0383	Mosaic cnLOH
ACC	TCGA-OR-A5L5-01A-11D-A29H-01	7	44167	152780564	0.2517	-0.0593	Mosaic Loss
ACC	TCGA-OR-A5L5-01A-11D-A29H-01	7	152932263	159116965	0.2521	-0.0848	Mosaic Loss
ACC	TCGA-OR-A5L5-01A-11D-A29H-01	8	113565	49341418	0.1513	0.0851	Mosaic Gain
ACC	TCGA-OR-A5L5-01A-11D-A29H-01	8	50108510	55483583	0.1016	0.1128	Mosaic Gain
ACC	TCGA-OR-A5L5-01A-11D-A29H-01	9	46587	141071475	0.2503	-0.0364	Mosaic cnLOH
ACC	TCGA-OR-A5L5-01A-11D-A29H-01	10	104427	135434551	0.2504	-0.0414	Mosaic cnLOH
ACC	TCGA-OR-A5L5-01A-11D-A29H-01	11	211447	134938470	0.2516	-0.0417	Mosaic cnLOH
ACC	TCGA-OR-A5L5-01A-11D-A29H-01	13	19045628	115106996	0.2532	-0.0135	Mosaic cnLOH
ACC	TCGA-OR-A5L5-01A-11D-A29H-01	14	20211644	107285437	0.2531	-0.029	Mosaic cnLOH
ACC	TCGA-OR-A5L5-01A-11D-A29H-01	15	20071673	102395843	0.2498	-0.0412	Mosaic cnLOH
ACC	TCGA-OR-A5L5-01A-11D-A29H-01	17	113794	81048659	0.2518	-0.0379	Mosaic cnLOH
ACC	TCGA-OR-A5L5-01A-11D-A29H-01	18	100949	4498870	0.2621	-0.0163	Mosaic cnLOH
ACC	TCGA-OR-A5L5-01A-11D-A29H-01	18	4590283	77963966	0.2525	-0.0392	Mosaic cnLOH
ACC	TCGA-OR-A5L5-01A-11D-A29H-01	19	827975	59093464	0.2459	-0.0721	Mosaic Loss
ACC	TCGA-OR-A5L5-01A-11D-A29H-01	21	14790733	48084820	0.2468	-0.0505	Mosaic Loss
ACC	TCGA-OR-A5L5-01A-11D-A29H-01	22	16055171	51219006	0.2379	-0.0718	Mosaic Loss
ACC	TCGA-OR-A5L6-01A-11D-A29H-01	1	777122	53934091	0.3779	-0.1542	Mosaic Loss
ACC	TCGA-OR-A5L6-01A-11D-A29H-01	1	54777207	249198692	0.3877	-0.1661	Mosaic Loss
ACC	TCGA-OR-A5L6-01A-11D-A29H-01	2	15703	243048760	0.4228	0.069	Mosaic Gain
ACC	TCGA-OR-A5L6-01A-11D-A29H-01	3	69244	197808975	0.4064	-0.0404	Mosaic cnLOH
ACC	TCGA-OR-A5L6-01A-11D-A29H-01	4	61981	190930894	0.4254	0.0886	Mosaic Gain
ACC	TCGA-OR-A5L6-01A-11D-A29H-01	5	1674972	29082654	0.2438	0.211	Mosaic Gain
ACC	TCGA-OR-A5L6-01A-11D-A29H-01	5	29635164	32094654	0.2131	0.3204	Mosaic Gain
ACC	TCGA-OR-A5L6-01A-11D-A29H-01	5	33631616	34372083	0.2358	0.2117	Inherited Duplication
ACC	TCGA-OR-A5L6-01A-11D-A29H-01	5	41620666	50168241	0.2295	0.3173	Mosaic Gain
ACC	TCGA-OR-A5L6-01A-11D-A29H-01	6	433962	170905977	0.4239	0.0743	Mosaic Gain
ACC	TCGA-OR-A5L6-01A-11D-A29H-01	7	44167	151641059	0.4203	0.0464	Mosaic cnLOH
ACC	TCGA-OR-A5L6-01A-11D-A29H-01	7	152421188	159116965	0.4113	0.0275	Mosaic cnLOH
ACC	TCGA-OR-A5L6-01A-11D-A29H-01	8	113565	146293414	0.208	0.0355	Mosaic cnLOH
ACC	TCGA-OR-A5L6-01A-11D-A29H-01	9	46587	20476130	0.425	0.0734	Mosaic Gain
ACC	TCGA-OR-A5L6-01A-11D-A29H-01	9	20830067	141071475	0.4218	0.0723	Mosaic Gain
ACC	TCGA-OR-A5L6-01A-11D-A29H-01	10	104427	67854220	0.4124	-0.0015	Mosaic cnLOH
ACC	TCGA-OR-A5L6-01A-11D-A29H-01	10	68522925	135434551	0.4009	-0.0453	Mosaic cnLOH
ACC	TCGA-OR-A5L6-01A-11D-A29H-01	11	211447	134835614	0.4087	-0.0171	Mosaic cnLOH
ACC	TCGA-OR-A5L6-01A-11D-A29H-01	12	43081273	43304012	0.0757	0.5661	Inherited Duplication
ACC	TCGA-OR-A5L6-01A-11D-A29H-01	13	19450905	115106996	0.3435	-0.3676	Mosaic Loss
ACC	TCGA-OR-A5L6-01A-11D-A29H-01	14	20211644	107285437	0.4039	-0.0418	Mosaic cnLOH
ACC	TCGA-OR-A5L6-01A-11D-A29H-01	15	20071673	102400037	0.3392	-0.3777	Mosaic Loss
ACC	TCGA-OR-A5L6-01A-11D-A29H-01	17	111223	81048659	0.4007	-0.0338	Mosaic cnLOH
ACC	TCGA-OR-A5L6-01A-11D-A29H-01	18	100949	78014582	0.3908	-0.1265	Mosaic Loss
ACC	TCGA-OR-A5L6-01A-11D-A29H-01	19	260912	59082605	0.41	0.0204	Mosaic cnLOH
ACC	TCGA-OR-A5L6-01A-11D-A29H-01	21	15412399	48084820	0.4225	0.066	Mosaic Gain
ACC	TCGA-OR-A5L6-01A-11D-A29H-01	22	16055171	51219006	0.3266	-0.398	Mosaic Loss
ACC	TCGA-OR-A5L8-01A-11D-A29H-01	1	798959	249198692	0.4181	-0.171	Mosaic Loss
ACC	TCGA-OR-A5L8-01A-11D-A29H-01	3	69244	196960901	0.1569	0.1588	Mosaic Gain
ACC	TCGA-OR-A5L8-01A-11D-A29H-01	3	197103161	197808975	0.1603	0.0904	Inherited Duplication
ACC	TCGA-OR-A5L8-01A-11D-A29H-01	4	61981	190771349	0.4228	-0.13	Mosaic Loss
ACC	TCGA-OR-A5L8-01A-11D-A29H-01	6	192157	169812358	0.4234	-0.1455	Mosaic Loss
ACC	TCGA-OR-A5L8-01A-11D-A29H-01	6	170158868	170905977	0.4127	-0.1805	Mosaic Loss
ACC	TCGA-OR-A5L8-01A-11D-A29H-01	7	44167	159116965	0.1518	0.1387	Mosaic Gain
ACC	TCGA-OR-A5L8-01A-11D-A29H-01	8	113565	1897657	0.1134	0.4964	Inherited Duplication
ACC	TCGA-OR-A5L8-01A-11D-A29H-01	8	2854453	3768656	0.1268	0.5584	Inherited Duplication
ACC	TCGA-OR-A5L8-01A-11D-A29H-01	9	546233	141071475	0.421	-0.1486	Mosaic Loss
ACC	TCGA-OR-A5L8-01A-11D-A29H-01	10	104427	134965295	0.1527	0.1525	Mosaic Gain
ACC	TCGA-OR-A5L8-01A-11D-A29H-01	10	135056464	135434551	0.1726	0.1268	Inherited Duplication
ACC	TCGA-OR-A5L8-01A-11D-A29H-01	11	211447	134942626	0.4179	-0.1531	Mosaic Loss
ACC	TCGA-OR-A5L8-01A-11D-A29H-01	12	382876	133777645	0.1518	0.1371	Mosaic Gain
ACC	TCGA-OR-A5L8-01A-11D-A29H-01	16	1521556	89720909	0.1466	0.1031	Mosaic Gain
ACC	TCGA-OR-A5L8-01A-11D-A29H-01	18	286372	78014582	0.4228	-0.1429	Mosaic Loss
ACC	TCGA-OR-A5L8-01A-11D-A29H-01	21	14642464	48084820	0.4207	-0.1431	Mosaic Loss
ACC	TCGA-OR-A5L8-01A-11D-A29H-01	22	16055171	51219006	0.407	-0.1862	Mosaic Loss
ACC	TCGA-OR-A5L9-01A-11D-A29H-01	1	949608	249198692	0.3324	-0.1284	Mosaic Loss
ACC	TCGA-OR-A5L9-01A-11D-A29H-01	2	15703	243048760	0.3332	-0.1156	Mosaic Loss
ACC	TCGA-OR-A5L9-01A-11D-A29H-01	3	69244	197808975	0.3338	-0.1195	Mosaic Loss
ACC	TCGA-OR-A5L9-01A-11D-A29H-01	4	61981	190922257	0.3345	-0.1133	Mosaic Loss
ACC	TCGA-OR-A5L9-01A-11D-A29H-01	6	190044	167742160	0.3332	-0.119	Mosaic Loss
ACC	TCGA-OR-A5L9-01A-11D-A29H-01	6	168597242	170905977	0.3293	-0.0427	Mosaic cnLOH
ACC	TCGA-OR-A5L9-01A-11D-A29H-01	7	44167	105705445	0.3286	-0.1487	Mosaic Loss
ACC	TCGA-OR-A5L9-01A-11D-A29H-01	7	105806598	159116575	0.3311	-0.1402	Mosaic Loss
ACC	TCGA-OR-A5L9-01A-11D-A29H-01	9	101857	141071475	0.3331	-0.1071	Mosaic Loss
ACC	TCGA-OR-A5L9-01A-11D-A29H-01	10	104427	135434551	0.3333	-0.1024	Mosaic Loss
ACC	TCGA-OR-A5L9-01A-11D-A29H-01	11	211447	134942626	0.3329	-0.1154	Mosaic Loss
ACC	TCGA-OR-A5L9-01A-11D-A29H-01	13	19212262	115106996	0.3381	-0.0936	Mosaic Loss
ACC	TCGA-OR-A5L9-01A-11D-A29H-01	14	20211644	107285437	0.335	-0.1026	Mosaic Loss
ACC	TCGA-OR-A5L9-01A-11D-A29H-01	15	20071673	102155682	0.3327	-0.1124	Mosaic Loss
ACC	TCGA-OR-A5L9-01A-11D-A29H-01	17	114669	81048659	0.3315	-0.1004	Mosaic Loss
ACC	TCGA-OR-A5L9-01A-11D-A29H-01	18	100949	78014582	0.3322	-0.1137	Mosaic Loss
ACC	TCGA-OR-A5L9-01A-11D-A29H-01	19	260912	296458	0.3629	-0.181	Mosaic Loss
ACC	TCGA-OR-A5L9-01A-11D-A29H-01	19	1059004	59093464	0.3521	-0.0475	Mosaic cnLOH
ACC	TCGA-OR-A5L9-01A-11D-A29H-01	21	14929930	48084820	0.3362	-0.1056	Mosaic Loss
ACC	TCGA-OR-A5L9-01A-11D-A29H-01	22	16055171	51219006	0.3271	-0.0996	Mosaic Loss
ACC	TCGA-OR-A5LA-01A-11D-A29H-01	1	2040898	39240157	0.2568	-0.096	Mosaic Loss
ACC	TCGA-OR-A5LA-01A-11D-A29H-01	1	39542129	249198692	0.2634	-0.1035	Mosaic Loss
ACC	TCGA-OR-A5LA-01A-11D-A29H-01	2	15703	243048760	0.2639	-0.0828	Mosaic Loss
ACC	TCGA-OR-A5LA-01A-11D-A29H-01	3	69244	197808975	0.2638	-0.0798	Mosaic Loss
ACC	TCGA-OR-A5LA-01A-11D-A29H-01	6	233750	170905977	0.2649	-0.0831	Mosaic Loss
ACC	TCGA-OR-A5LA-01A-11D-A29H-01	9	218183	141071475	0.2628	-0.0809	Mosaic Loss
ACC	TCGA-OR-A5LA-01A-11D-A29H-01	10	104427	135434551	0.2646	-0.0841	Mosaic Loss
ACC	TCGA-OR-A5LA-01A-11D-A29H-01	11	211447	134942626	0.2635	-0.0904	Mosaic Loss
ACC	TCGA-OR-A5LA-01A-11D-A29H-01	13	19307316	115106996	0.2676	-0.0507	Mosaic Loss
ACC	TCGA-OR-A5LA-01A-11D-A29H-01	14	20211644	107285437	0.2637	-0.0784	Mosaic Loss
ACC	TCGA-OR-A5LA-01A-11D-A29H-01	15	20071673	102400037	0.2615	-0.0897	Mosaic Loss
ACC	TCGA-OR-A5LA-01A-11D-A29H-01	17	129225	81048659	0.2602	-0.1023	Mosaic Loss
ACC	TCGA-OR-A5LA-01A-11D-A29H-01	18	100949	78014582	0.2644	-0.0771	Mosaic Loss
ACC	TCGA-OR-A5LA-01A-11D-A29H-01	19	260912	17199426	0.2561	-0.1425	Mosaic Loss
ACC	TCGA-OR-A5LA-01A-11D-A29H-01	19	18567039	59093239	0.2571	-0.1291	Mosaic Loss
ACC	TCGA-OR-A5LA-01A-11D-A29H-01	21	14665973	48084820	0.3637	0.2675	Mosaic Gain
ACC	TCGA-OR-A5LA-01A-11D-A29H-01	22	16055171	51219006	0.2576	-0.1083	Mosaic Loss
ACC	TCGA-OR-A5LB-01A-11D-A29H-01	1	1129672	249198692	0.4175	-0.2197	Mosaic Loss
ACC	TCGA-OR-A5LB-01A-11D-A29H-01	2	15703	243048760	0.4192	-0.2048	Mosaic Loss
ACC	TCGA-OR-A5LB-01A-11D-A29H-01	3	69244	88018388	0.422	-0.1924	Mosaic Loss
ACC	TCGA-OR-A5LB-01A-11D-A29H-01	3	89432683	197800244	0.4206	-0.1999	Mosaic Loss
ACC	TCGA-OR-A5LB-01A-11D-A29H-01	4	182470191	190930894	0.4193	-0.1885	Mosaic Loss
ACC	TCGA-OR-A5LB-01A-11D-A29H-01	6	174769	56178016	0.4178	-0.2334	Mosaic Loss
ACC	TCGA-OR-A5LB-01A-11D-A29H-01	6	57110411	170905977	0.4235	-0.1691	Mosaic Loss
ACC	TCGA-OR-A5LB-01A-11D-A29H-01	8	161222	146293414	0.4172	-0.2443	Mosaic Loss
ACC	TCGA-OR-A5LB-01A-11D-A29H-01	9	46587	38771460	0.4209	-0.1863	Mosaic Loss
ACC	TCGA-OR-A5LB-01A-11D-A29H-01	11	340219	134942626	0.4203	-0.2008	Mosaic Loss
ACC	TCGA-OR-A5LB-01A-11D-A29H-01	13	19604485	114949314	0.4261	-0.1704	Mosaic Loss
ACC	TCGA-OR-A5LB-01A-11D-A29H-01	15	20191741	102400037	0.4795	0.3055	Mosaic Gain
ACC	TCGA-OR-A5LB-01A-11D-A29H-01	16	86671	7151571	0.4104	-0.2387	Mosaic Loss
ACC	TCGA-OR-A5LB-01A-11D-A29H-01	16	35111585	90163275	0.4157	-0.2197	Mosaic Loss
ACC	TCGA-OR-A5LB-01A-11D-A29H-01	17	6689	81048659	0.4157	-0.2022	Mosaic Loss
ACC	TCGA-OR-A5LB-01A-11D-A29H-01	18	100949	77984345	0.421	-0.199	Mosaic Loss
ACC	TCGA-OR-A5LB-01A-11D-A29H-01	22	17100497	51219006	0.4129	-0.2247	Mosaic Loss
ACC	TCGA-OR-A5LC-01A-11D-A29H-01	1	752566	120517959	0.3899	-0.3519	Mosaic Loss
ACC	TCGA-OR-A5LC-01A-11D-A29H-01	2	180147250	181664063	0.1443	0.4662	Inherited Duplication
ACC	TCGA-OR-A5LC-01A-11D-A29H-01	2	200164252	202603147	0.0886	0.1917	Mosaic Gain
ACC	TCGA-OR-A5LC-01A-11D-A29H-01	2	215384466	215629543	0.0869	0.1873	Inherited Duplication
ACC	TCGA-OR-A5LC-01A-11D-A29H-01	2	217820635	222976013	0.1062	0.1199	Mosaic Gain
ACC	TCGA-OR-A5LC-01A-11D-A29H-01	2	223892964	224924897	0.0789	0.189	Inherited Duplication
ACC	TCGA-OR-A5LC-01A-11D-A29H-01	2	230094821	230752964	0.0989	0.2282	Inherited Duplication
ACC	TCGA-OR-A5LC-01A-11D-A29H-01	2	234161448	235683141	0.0817	0.1671	Inherited Duplication
ACC	TCGA-OR-A5LC-01A-11D-A29H-01	2	240319090	243048760	0.3163	-0.1451	Mosaic Loss
ACC	TCGA-OR-A5LC-01A-11D-A29H-01	3	69244	197808975	0.1516	-0.059	Mosaic Loss
ACC	TCGA-OR-A5LC-01A-11D-A29H-01	4	61981	190930894	0.1541	-0.0604	Mosaic Loss
ACC	TCGA-OR-A5LC-01A-11D-A29H-01	5	36344	10319591	0.3733	-0.4213	Mosaic Loss
ACC	TCGA-OR-A5LC-01A-11D-A29H-01	5	10765633	28720220	0.3788	-0.3913	Mosaic Loss
ACC	TCGA-OR-A5LC-01A-11D-A29H-01	5	31660967	33274061	0.2144	0.6578	Inherited Duplication
ACC	TCGA-OR-A5LC-01A-11D-A29H-01	6	375759	170896644	0.3915	-0.3714	Mosaic Loss
ACC	TCGA-OR-A5LC-01A-11D-A29H-01	7	7317215	7881021	0.309	-0.1269	Mosaic Loss
ACC	TCGA-OR-A5LC-01A-11D-A29H-01	9	101857	21846327	0.3939	-0.374	Mosaic Loss
ACC	TCGA-OR-A5LC-01A-11D-A29H-01	9	22133251	140382636	0.4255	-0.128	Mosaic Loss
ACC	TCGA-OR-A5LC-01A-11D-A29H-01	11	211447	128668092	0.3891	-0.3697	Mosaic Loss
ACC	TCGA-OR-A5LC-01A-11D-A29H-01	11	129018989	134938470	0.3831	-0.4007	Mosaic Loss
ACC	TCGA-OR-A5LC-01A-11D-A29H-01	14	20511673	51084235	0.151	-0.0407	Mosaic cnLOH
ACC	TCGA-OR-A5LC-01A-11D-A29H-01	14	51432832	76383219	0.3871	-0.3669	Mosaic Loss
ACC	TCGA-OR-A5LC-01A-11D-A29H-01	14	77254099	107285437	0.1499	-0.0601	Mosaic Loss
ACC	TCGA-OR-A5LC-01A-11D-A29H-01	15	20071673	102158781	0.1477	-0.0623	Mosaic Loss
ACC	TCGA-OR-A5LC-01A-11D-A29H-01	17	159851	81048659	0.1489	-0.0658	Mosaic Loss
ACC	TCGA-OR-A5LC-01A-11D-A29H-01	18	100949	77579773	0.151	-0.0622	Mosaic Loss
ACC	TCGA-OR-A5LC-01A-11D-A29H-01	21	15659254	48084820	0.148	-0.0672	Mosaic Loss
ACC	TCGA-OR-A5LC-01A-11D-A29H-01	22	16055171	29387370	0.3792	-0.3766	Mosaic Loss
ACC	TCGA-OR-A5LC-01A-11D-A29H-01	22	29654004	51156666	0.3788	-0.3699	Mosaic Loss
ACC	TCGA-OR-A5LD-01A-11D-A29H-01	1	947034	249198692	0.1552	-0.0007	Mosaic cnLOH
ACC	TCGA-OR-A5LD-01A-11D-A29H-01	3	295654	197808975	0.156	0.024	Mosaic cnLOH
ACC	TCGA-OR-A5LD-01A-11D-A29H-01	4	61981	190930894	0.1557	0.0503	Mosaic Gain
ACC	TCGA-OR-A5LD-01A-11D-A29H-01	5	36344	180692833	0.1544	-0.0035	Mosaic cnLOH
ACC	TCGA-OR-A5LD-01A-11D-A29H-01	6	165632	169106548	0.1542	0.0258	Mosaic cnLOH
ACC	TCGA-OR-A5LD-01A-11D-A29H-01	6	169175214	170905977	0.1465	0.0428	Mosaic cnLOH
ACC	TCGA-OR-A5LD-01A-11D-A29H-01	7	44167	20633736	0.2387	0.2421	Mosaic Gain
ACC	TCGA-OR-A5LD-01A-11D-A29H-01	7	41013284	42101493	0.1838	0.0593	Mosaic Gain
ACC	TCGA-OR-A5LD-01A-11D-A29H-01	7	43157968	43664625	0.2595	0.1944	Inherited Duplication
ACC	TCGA-OR-A5LD-01A-11D-A29H-01	7	44772053	45225854	0.2091	0.0388	Mosaic cnLOH
ACC	TCGA-OR-A5LD-01A-11D-A29H-01	7	48756632	50027012	0.228	0.2469	Inherited Duplication
ACC	TCGA-OR-A5LD-01A-11D-A29H-01	7	50364626	50728482	0.1451	-0.1118	Mosaic Loss
ACC	TCGA-OR-A5LD-01A-11D-A29H-01	7	63464342	77635119	0.2576	0.3488	Mosaic Gain
ACC	TCGA-OR-A5LD-01A-11D-A29H-01	7	77653806	159116965	0.3926	-0.2201	Mosaic Loss
ACC	TCGA-OR-A5LD-01A-11D-A29H-01	8	113565	27742959	0.1559	0.0325	Mosaic cnLOH
ACC	TCGA-OR-A5LD-01A-11D-A29H-01	9	304276	141054761	0.155	0.0237	Mosaic cnLOH
ACC	TCGA-OR-A5LD-01A-11D-A29H-01	14	20264019	107285437	0.1559	0.0238	Mosaic cnLOH
ACC	TCGA-OR-A5LD-01A-11D-A29H-01	16	107275	31768214	0.2384	0.1773	Mosaic Gain
ACC	TCGA-OR-A5LD-01A-11D-A29H-01	16	61610699	69907848	0.3591	0.691	Mosaic Gain
ACC	TCGA-OR-A5LD-01A-11D-A29H-01	17	34276	25573941	0.151	0.0185	Mosaic cnLOH
ACC	TCGA-OR-A5LD-01A-11D-A29H-01	17	48208274	79255998	0.1684	0.0022	Mosaic cnLOH
ACC	TCGA-OR-A5LD-01A-11D-A29H-01	19	7834274	28304729	0.1873	0.4484	Mosaic Gain
ACC	TCGA-OR-A5LD-01A-11D-A29H-01	20	61795	62912463	0.1526	-0.0484	Mosaic cnLOH
ACC	TCGA-OR-A5LD-01A-11D-A29H-01	21	10962411	48084820	0.159	0.0351	Mosaic cnLOH
ACC	TCGA-OR-A5LD-01A-11D-A29H-01	22	16055171	37843850	0.1477	-0.0376	Mosaic cnLOH
ACC	TCGA-OR-A5LE-01A-11D-A29H-01	1	144946510	192348102	0.3126	-0.1662	Mosaic Loss
ACC	TCGA-OR-A5LE-01A-11D-A29H-01	1	192911972	204467022	0.1517	0.408	Mosaic Gain
ACC	TCGA-OR-A5LE-01A-11D-A29H-01	3	94213630	197808975	0.4157	-0.4331	Mosaic Loss
ACC	TCGA-OR-A5LE-01A-11D-A29H-01	4	103849758	141022317	0.3666	-0.3601	Mosaic Loss
ACC	TCGA-OR-A5LE-01A-11D-A29H-01	4	158996467	190930894	0.3748	-0.3638	Mosaic Loss
ACC	TCGA-OR-A5LE-01A-11D-A29H-01	6	322696	64858568	0.4118	-0.4454	Mosaic Loss
ACC	TCGA-OR-A5LE-01A-11D-A29H-01	6	76272274	93259842	0.1774	0.514	Mosaic Gain
ACC	TCGA-OR-A5LE-01A-11D-A29H-01	6	94439962	94712359	0.2408	0.7769	Inherited Duplication
ACC	TCGA-OR-A5LE-01A-11D-A29H-01	6	95673164	103583587	0.2381	0.6578	Mosaic Gain
ACC	TCGA-OR-A5LE-01A-11D-A29H-01	6	105656760	107114361	0.2533	0.6495	Inherited Duplication
ACC	TCGA-OR-A5LE-01A-11D-A29H-01	6	108293757	110160501	0.2239	0.5267	Inherited Duplication
ACC	TCGA-OR-A5LE-01A-11D-A29H-01	6	114464970	141630965	0.1895	0.5423	Mosaic Gain
ACC	TCGA-OR-A5LE-01A-11D-A29H-01	6	160872786	162729527	0.1634	0.397	Inherited Duplication
ACC	TCGA-OR-A5LE-01A-11D-A29H-01	7	4939360	18963338	0.1579	0.4242	Mosaic Gain
ACC	TCGA-OR-A5LE-01A-11D-A29H-01	9	46587	35843080	0.417	-0.4246	Mosaic Loss
ACC	TCGA-OR-A5LE-01A-11D-A29H-01	10	104427	30090127	0.3459	-0.3536	Mosaic Loss
ACC	TCGA-OR-A5LE-01A-11D-A29H-01	10	132803922	135434551	0.2109	0.0329	Mosaic cnLOH
ACC	TCGA-OR-A5LE-01A-11D-A29H-01	11	211447	3158634	0.4923	0.1556	Mosaic Gain
ACC	TCGA-OR-A5LE-01A-11D-A29H-01	17	110908	81004770	0.4182	-0.4077	Mosaic Loss
ACC	TCGA-OR-A5LE-01A-11D-A29H-01	21	10962411	48084747	0.4159	-0.406	Mosaic Loss
ACC	TCGA-OR-A5LF-01A-11D-A309-01	1	949608	249198692	0.3505	-0.127	Mosaic Loss
ACC	TCGA-OR-A5LF-01A-11D-A309-01	2	15703	243048760	0.3501	-0.1077	Mosaic Loss
ACC	TCGA-OR-A5LF-01A-11D-A309-01	3	69244	193887662	0.3524	-0.0999	Mosaic Loss
ACC	TCGA-OR-A5LF-01A-11D-A309-01	3	194107407	197566540	0.3425	-0.102	Mosaic Loss
ACC	TCGA-OR-A5LF-01A-11D-A309-01	5	1395077	7890055	0.1286	0.0835	Mosaic Gain
ACC	TCGA-OR-A5LF-01A-11D-A309-01	5	10275870	16379041	0.1321	0.1268	Mosaic Gain
ACC	TCGA-OR-A5LF-01A-11D-A309-01	5	18158618	34593365	0.1287	0.1903	Mosaic Gain
ACC	TCGA-OR-A5LF-01A-11D-A309-01	5	53704319	53906103	0.1431	0.1055	Inherited Duplication
ACC	TCGA-OR-A5LF-01A-11D-A309-01	6	322696	170905977	0.3528	-0.1028	Mosaic Loss
ACC	TCGA-OR-A5LF-01A-11D-A309-01	7	44167	884743	0.1326	0.17	Inherited Duplication
ACC	TCGA-OR-A5LF-01A-11D-A309-01	7	1677399	144470326	0.134	0.1533	Mosaic Gain
ACC	TCGA-OR-A5LF-01A-11D-A309-01	7	146222177	159116575	0.1327	0.1229	Mosaic Gain
ACC	TCGA-OR-A5LF-01A-11D-A309-01	9	244577	141071475	0.3509	-0.1042	Mosaic Loss
ACC	TCGA-OR-A5LF-01A-11D-A309-01	10	104427	135434551	0.3511	-0.1083	Mosaic Loss
ACC	TCGA-OR-A5LF-01A-11D-A309-01	11	211447	134942626	0.3378	-0.163	Mosaic Loss
ACC	TCGA-OR-A5LF-01A-11D-A309-01	13	19212262	115106996	0.3553	-0.0734	Mosaic Loss
ACC	TCGA-OR-A5LF-01A-11D-A309-01	14	20211644	107285437	0.3517	-0.1001	Mosaic Loss
ACC	TCGA-OR-A5LF-01A-11D-A309-01	15	20071673	102395843	0.348	-0.1185	Mosaic Loss
ACC	TCGA-OR-A5LF-01A-11D-A309-01	17	185918	81048659	0.3504	-0.1256	Mosaic Loss
ACC	TCGA-OR-A5LF-01A-11D-A309-01	18	100949	78014582	0.3515	-0.1032	Mosaic Loss
ACC	TCGA-OR-A5LF-01A-11D-A309-01	19	260912	59093464	0.3397	-0.1652	Mosaic Loss
ACC	TCGA-OR-A5LF-01A-11D-A309-01	20	61795	52729639	0.1343	0.0981	Mosaic Gain
ACC	TCGA-OR-A5LF-01A-11D-A309-01	20	52831496	59928237	0.3408	-0.1789	Mosaic Loss
ACC	TCGA-OR-A5LF-01A-11D-A309-01	20	60130351	62912463	0.1332	0.0682	Mosaic Gain
ACC	TCGA-OR-A5LF-01A-11D-A309-01	21	10962411	20578960	0.258	-0.4591	Mosaic Loss
ACC	TCGA-OR-A5LF-01A-11D-A309-01	21	20804280	48084820	0.3144	-0.2671	Mosaic Loss
ACC	TCGA-OR-A5LF-01A-11D-A309-01	22	16055171	51105556	0.28	-0.3971	Mosaic Loss
ACC	TCGA-OR-A5LG-01A-11D-A29H-01	1	1333436	88112646	0.3478	-0.3674	Mosaic Loss
ACC	TCGA-OR-A5LG-01A-11D-A29H-01	1	97660692	108036833	0.3703	-0.2999	Mosaic Loss
ACC	TCGA-OR-A5LG-01A-11D-A29H-01	1	109177376	117025609	0.3464	-0.3611	Mosaic Loss
ACC	TCGA-OR-A5LG-01A-11D-A29H-01	2	3011244	89129064	0.3518	-0.3744	Mosaic Loss
ACC	TCGA-OR-A5LG-01A-11D-A29H-01	4	45961673	49061141	0.3589	-0.3527	Mosaic Loss
ACC	TCGA-OR-A5LG-01A-11D-A29H-01	4	79596462	108798701	0.356	-0.3532	Mosaic Loss
ACC	TCGA-OR-A5LG-01A-11D-A29H-01	5	169902	34089289	0.2746	-0.1588	Mosaic Loss
ACC	TCGA-OR-A5LG-01A-11D-A29H-01	5	36714918	39589676	0.1537	0.3216	Mosaic Gain
ACC	TCGA-OR-A5LG-01A-11D-A29H-01	6	101371518	108311273	0.3714	-0.338	Mosaic Loss
ACC	TCGA-OR-A5LG-01A-11D-A29H-01	6	111378759	170872572	0.3524	-0.3468	Mosaic Loss
ACC	TCGA-OR-A5LG-01A-11D-A29H-01	8	161222	40944012	0.3543	-0.3682	Mosaic Loss
ACC	TCGA-OR-A5LG-01A-11D-A29H-01	9	46587	28774737	0.3558	-0.3634	Mosaic Loss
ACC	TCGA-OR-A5LG-01A-11D-A29H-01	9	119487330	122007715	0.3478	-0.381	Mosaic Loss
ACC	TCGA-OR-A5LG-01A-11D-A29H-01	11	25086509	26347073	0.1499	0.441	Inherited Duplication
ACC	TCGA-OR-A5LG-01A-11D-A29H-01	11	28577867	29445672	0.249	0.5994	Inherited Duplication
ACC	TCGA-OR-A5LG-01A-11D-A29H-01	12	192220	25227349	0.3452	-0.376	Mosaic Loss
ACC	TCGA-OR-A5LG-01A-11D-A29H-01	13	71138872	71510793	0.3758	-0.1674	Mosaic Loss
ACC	TCGA-OR-A5LG-01A-11D-A29H-01	16	300641	7325578	0.3574	-0.3674	Mosaic Loss
ACC	TCGA-OR-A5LG-01A-11D-A29H-01	16	46640695	73556224	0.2146	0.5221	Mosaic Gain
ACC	TCGA-OR-A5LG-01A-11D-A29H-01	16	74130605	90148449	0.3438	-0.3881	Mosaic Loss
ACC	TCGA-OR-A5LG-01A-11D-A29H-01	17	32018335	81048659	0.3435	-0.3854	Mosaic Loss
ACC	TCGA-OR-A5LG-01A-11D-A29H-01	18	14919308	21996739	0.2243	0.5146	Mosaic Gain
ACC	TCGA-OR-A5LG-01A-11D-A29H-01	18	23228559	78014582	0.3469	-0.3362	Mosaic Loss
ACC	TCGA-OR-A5LG-01A-11D-A29H-01	19	260912	607984	0.056	0.0947	Inherited Duplication
ACC	TCGA-OR-A5LG-01A-11D-A29H-01	21	28724136	48084820	0.3443	-0.3829	Mosaic Loss
ACC	TCGA-OR-A5LG-01A-11D-A29H-01	22	16055171	22534686	0.3333	-0.3981	Mosaic Loss
ACC	TCGA-OR-A5LG-01A-11D-A29H-01	22	28054280	38164106	0.3407	-0.4131	Mosaic Loss
ACC	TCGA-OR-A5LH-01A-11D-A29H-01	1	777122	33906842	0.3393	-0.0902	Mosaic Loss
ACC	TCGA-OR-A5LH-01A-11D-A29H-01	1	34294726	249198692	0.3482	-0.1165	Mosaic Loss
ACC	TCGA-OR-A5LH-01A-11D-A29H-01	2	15703	243048760	0.3487	-0.1006	Mosaic Loss
ACC	TCGA-OR-A5LH-01A-11D-A29H-01	3	69244	197307725	0.3484	-0.1012	Mosaic Loss
ACC	TCGA-OR-A5LH-01A-11D-A29H-01	6	355198	170896644	0.3507	-0.0998	Mosaic Loss
ACC	TCGA-OR-A5LH-01A-11D-A29H-01	8	237671	146293414	0.3453	-0.1404	Mosaic Loss
ACC	TCGA-OR-A5LH-01A-11D-A29H-01	9	46587	141071475	0.348	-0.0933	Mosaic Loss
ACC	TCGA-OR-A5LH-01A-11D-A29H-01	10	104427	135434551	0.3471	-0.098	Mosaic Loss
ACC	TCGA-OR-A5LH-01A-11D-A29H-01	11	211447	134942626	0.3466	-0.1018	Mosaic Loss
ACC	TCGA-OR-A5LH-01A-11D-A29H-01	13	19596332	115106996	0.3524	-0.0774	Mosaic Loss
ACC	TCGA-OR-A5LH-01A-11D-A29H-01	14	20211644	107285437	0.348	-0.0937	Mosaic Loss
ACC	TCGA-OR-A5LH-01A-11D-A29H-01	15	20071673	102400037	0.3469	-0.1026	Mosaic Loss
ACC	TCGA-OR-A5LH-01A-11D-A29H-01	16	86671	90163275	0.3434	-0.1187	Mosaic Loss
ACC	TCGA-OR-A5LH-01A-11D-A29H-01	17	6689	81048659	0.3428	-0.0971	Mosaic Loss
ACC	TCGA-OR-A5LH-01A-11D-A29H-01	18	100949	78014582	0.349	-0.0993	Mosaic Loss
ACC	TCGA-OR-A5LH-01A-11D-A29H-01	19	260912	59093464	0.3389	-0.1313	Mosaic Loss
ACC	TCGA-OR-A5LH-01A-11D-A29H-01	20	61795	62912463	0.3437	-0.1491	Mosaic Loss
ACC	TCGA-OR-A5LH-01A-11D-A29H-01	21	10962411	48084820	0.3477	-0.0958	Mosaic Loss
ACC	TCGA-OR-A5LH-01A-11D-A29H-01	22	16055171	51219006	0.3415	-0.1144	Mosaic Loss
ACC	TCGA-OR-A5LI-01A-11D-A309-01	1	752566	19622270	0.2945	-0.2457	Mosaic Loss
ACC	TCGA-OR-A5LI-01A-11D-A309-01	1	31781279	85951222	0.1618	-0.0258	Mosaic cnLOH
ACC	TCGA-OR-A5LI-01A-11D-A309-01	1	119899035	249198692	0.2342	0.0915	Mosaic Gain
ACC	TCGA-OR-A5LI-01A-11D-A309-01	3	277219	197808975	0.1631	-0.038	Mosaic cnLOH
ACC	TCGA-OR-A5LI-01A-11D-A309-01	4	61981	190930894	0.1936	-0.1096	Mosaic Loss
ACC	TCGA-OR-A5LI-01A-11D-A309-01	5	36344	180692833	0.1607	-0.0614	Mosaic Loss
ACC	TCGA-OR-A5LI-01A-11D-A309-01	6	165632	53560828	0.1609	-0.0782	Mosaic Loss
ACC	TCGA-OR-A5LI-01A-11D-A309-01	7	6053264	11778873	0.1598	-0.0625	Mosaic Loss
ACC	TCGA-OR-A5LI-01A-11D-A309-01	7	12333929	159116965	0.1605	-0.0701	Mosaic Loss
ACC	TCGA-OR-A5LI-01A-11D-A309-01	8	113565	125438675	0.1594	-0.0676	Mosaic Loss
ACC	TCGA-OR-A5LI-01A-11D-A309-01	8	125838746	146151479	0.1637	-0.1036	Mosaic Loss
ACC	TCGA-OR-A5LI-01A-11D-A309-01	9	9329870	9582128	0.1694	-0.0089	Mosaic cnLOH
ACC	TCGA-OR-A5LI-01A-11D-A309-01	9	33762135	34605022	0.1407	0.3547	Inherited Duplication
ACC	TCGA-OR-A5LI-01A-11D-A309-01	9	92204172	92863179	0.1255	0.2797	Inherited Duplication
ACC	TCGA-OR-A5LI-01A-11D-A309-01	9	114435668	114922067	0.101	0.3331	Inherited Duplication
ACC	TCGA-OR-A5LI-01A-11D-A309-01	9	139617379	141071475	0.1872	-0.0329	Mosaic cnLOH
ACC	TCGA-OR-A5LI-01A-11D-A309-01	10	24194951	52809354	0.1603	-0.0583	Mosaic Loss
ACC	TCGA-OR-A5LI-01A-11D-A309-01	10	58431473	59279414	0.1551	0	Mosaic cnLOH
ACC	TCGA-OR-A5LI-01A-11D-A309-01	10	65340897	70816882	0.1565	-0.0107	Mosaic cnLOH
ACC	TCGA-OR-A5LI-01A-11D-A309-01	10	71343400	72442042	0.1287	0.4313	Inherited Duplication
[truncated: 276,850+ more rows]

## Sheet: Supplementary_Table_S2
Table S2: Summary of the comparison of chromosomal alterations inferred from hapLOH with those previously reported in TCGA as well as the performance of the proposed automated adjustment procedure on putative problematic cases in TCGA
TCGA Study	Total cases	Cases with Correlation	Positive Correlation	Negative Correlation (Before)	Negative Correlation, high AI (Before)	Negative Correlation, high AI (Adjusted)	Negative Correlation, high AI (Before) %	Negative Correlation, high AI (After) %	Negative Correlation, high AI (Adjusted) %
ACC	90	88	38	50	49	45	54.4444	4.44444	91.8367
BLCA	404	378	260	118	106	74	26.2376	7.92079	69.8113
BRCA	1071	1035	818	217	207	148	19.3277	5.50887	71.4976
CESC	294	286	242	44	41	30	13.9456	3.7415	73.1707
CHOL	36	34	26	8	7	7	19.4444	0	100
COAD	439	389	293	96	92	74	20.9567	4.10023	80.4348
DLBC	48	39	38	1	1	1	2.08333	0	100
ESCA	184	177	119	58	56	38	30.4348	9.78261	67.8571
GBM	505	497	470	27	24	21	4.75248	0.594059	87.5
HNSC	521	499	399	100	89	64	17.0825	4.79846	71.9101
KICH	66	62	50	12	11	11	16.6667	0	100
KIRC	516	481	438	43	30	22	5.81395	1.55039	73.3333
KIRP	285	269	256	13	12	11	4.21053	0.350877	91.6667
LAML	191	56	56	0	0	0	0	0	-
LGG	511	469	459	10	6	6	1.17417	0	100
LIHC	370	356	316	40	39	31	10.5405	2.16216	79.4872
LUAD	496	482	353	129	119	85	23.9919	6.85484	71.4286
LUSC	500	492	365	127	120	81	24	7.8	67.5
MESO	87	83	72	11	11	10	12.6437	1.14943	90.9091
OV	568	565	406	159	157	106	27.6408	8.97887	67.5159
PAAD	183	144	119	25	20	16	10.929	2.18579	80
PCPG	162	153	145	8	6	6	3.7037	0	100
PRAD	488	331	314	17	6	4	1.22951	0.409836	66.6667
READ	165	161	113	48	46	33	27.8788	7.87879	71.7391
SARC	255	235	172	63	59	42	23.1373	6.66667	71.1864
SKCM	367	355	271	84	78	59	21.2534	5.17711	75.641
STAD	440	396	308	88	80	55	18.1818	5.68182	68.75
TGCT	150	148	48	100	97	76	64.6667	14	78.3505
THCA	496	143	136	7	6	6	1.20968	0	100
THYM	123	46	38	8	8	8	6.50407	0	100
UCEC	535	389	342	47	45	34	8.41121	2.05607	75.5556
UCS	54	52	28	24	20	15	37.037	9.25926	75
UVM	80	74	69	5	5	5	6.25	0	100

## Sheet: Supplementary_Table_S3
Table S3: Putative problematic cases in TCGA based on the assessments of chromosomal alterations
TCGA Study	Sample	AI Burden	Correlation (Before Adjustment)	Correlation (After Adjustment)
ACC	TCGA-OR-A5J2-01A-11D-A29H-01	0.7697	-0.6751	0.6965
ACC	TCGA-OR-A5J3-01A-11D-A29H-01	0.7285	-0.9662	0.5993
ACC	TCGA-OR-A5J4-01A-11D-A29H-01	0.6245	-0.0131	-0.0865
ACC	TCGA-OR-A5J5-01A-11D-A29H-01	0.7434	-0.6031	0.7146
ACC	TCGA-OR-A5J6-01A-31D-A29H-01	0.5696	-0.7367	0.9065
ACC	TCGA-OR-A5J8-01A-11D-A29H-01	0.8608	-0.0356	-0.0061
ACC	TCGA-OR-A5JE-01A-11D-A29H-01	0.5479	-0.3629	0.7942
ACC	TCGA-OR-A5JF-01A-11D-A29H-01	0.642	-0.8359	0.9558
ACC	TCGA-OR-A5JI-01A-11D-A29H-01	0.6088	-0.7118	0.7471
ACC	TCGA-OR-A5JJ-01A-11D-A29H-01	0.6762	-0.7519	0.9083
ACC	TCGA-OR-A5JL-01A-11D-A29H-01	0.5976	-0.7754	0.9421
ACC	TCGA-OR-A5JM-01A-11D-A29H-01	0.6545	-0.427	-0.427
ACC	TCGA-OR-A5JP-01A-11D-A29H-01	0.6607	-0.0546	0.2898
ACC	TCGA-OR-A5JR-01A-11D-A29H-01	0.6536	-0.8378	0.8728
ACC	TCGA-OR-A5JT-01A-11D-A29H-01	0.7098	-0.826	0.9365
ACC	TCGA-OR-A5JZ-01A-11D-A29H-01	0.8105	-0.8608	0.747
ACC	TCGA-OR-A5K1-01A-11D-A29H-01	0.7217	-1	1
ACC	TCGA-OR-A5K2-01A-11D-A29H-01	0.7259	-0.7607	0.2984
ACC	TCGA-OR-A5K3-01A-11D-A29H-01	0.7539	-0.9518	0.7809
ACC	TCGA-OR-A5K4-01A-11D-A29H-01	0.71	-1	1
ACC	TCGA-OR-A5K5-01A-11D-A29H-01	0.5622	-0.2546	0.2813
ACC	TCGA-OR-A5K8-01A-11D-A29H-01	0.6377	-0.7273	0.7069
ACC	TCGA-OR-A5K9-01A-11D-A29H-01	0.8105	-0.455	0.3516
ACC	TCGA-OR-A5KO-01A-11D-A29H-01	0.6123	-0.7503	0.4586
ACC	TCGA-OR-A5KP-01A-11D-A309-01	0.6393	-0.6487	0.6753
ACC	TCGA-OR-A5KS-01A-11D-A309-01	0.7146	-0.6232	0.9681
ACC	TCGA-OR-A5KU-01A-11D-A29H-01	0.7328	-0.3187	0.6592
ACC	TCGA-OR-A5KW-01A-11D-A29H-01	0.6173	-0.8713	0.6685
ACC	TCGA-OR-A5KY-01A-11D-A29H-01	0.9304	-0.2504	0.3612
ACC	TCGA-OR-A5L1-01A-11D-A309-01	0.5805	-0.234	0.705
ACC	TCGA-OR-A5L4-01A-11D-A29H-01	0.7213	-0.858	0.966
ACC	TCGA-OR-A5L5-01A-11D-A29H-01	0.7977	-0.8987	1
ACC	TCGA-OR-A5L6-01A-11D-A29H-01	0.8429	-0.4883	0.6054
ACC	TCGA-OR-A5L8-01A-11D-A29H-01	0.6239	-0.0334	0.5823
ACC	TCGA-OR-A5L9-01A-11D-A29H-01	0.7783	-1	1
ACC	TCGA-OR-A5LA-01A-11D-A29H-01	0.6526	-0.9688	0.9688
ACC	TCGA-OR-A5LB-01A-11D-A29H-01	0.5802	-0.8397	0.8853
ACC	TCGA-OR-A5LD-01A-11D-A29H-01	0.5726	-0.6224	0.4524
ACC	TCGA-OR-A5LF-01A-11D-A309-01	0.7414	-0.7781	0.8721
ACC	TCGA-OR-A5LH-01A-11D-A29H-01	0.7592	-0.9307	0.8174
ACC	TCGA-OR-A5LJ-01A-11D-A29H-01	0.6124	-0.7584	0.7585
ACC	TCGA-OR-A5LK-01A-11D-A29H-01	0.5519	-0.8552	0.7432
ACC	TCGA-OR-A5LO-01A-11D-A29H-01	0.7442	-0.5378	0.4533
ACC	TCGA-OR-A5LP-01A-11D-A29H-01	0.7537	-1	0.963
ACC	TCGA-OR-A5LR-01A-11D-A29H-01	0.7787	-1	1
ACC	TCGA-OR-A5LT-01A-11D-A29H-01	0.7645	-0.2467	0.3169
ACC	TCGA-P6-A5OH-01A-11D-A309-01	0.6145	-0.3193	0.3109
ACC	TCGA-PA-A5YG-01A-11D-A29H-01	0.754	-1	0.9616
ACC	TCGA-PK-A5HC-01A-11D-A309-01	0.7111	-0.0626	-0.0045
BLCA	TCGA-2F-A9KO-01A-11D-A38F-01	0.6454	-0.1226	0.3692
BLCA	TCGA-4Z-AA7M-01A-11D-A390-01	0.7542	-0.2903	0.2645
BLCA	TCGA-4Z-AA7R-01A-11D-A390-01	0.7813	-0.0033	0.0977
BLCA	TCGA-4Z-AA80-01A-11D-A390-01	0.6698	-0.2247	0.2452
BLCA	TCGA-4Z-AA81-01A-11D-A390-01	0.6924	-0.601	0.2507
BLCA	TCGA-4Z-AA84-01A-11D-A390-01	0.803	-0.2303	0.1799
BLCA	TCGA-4Z-AA86-01A-11D-A390-01	0.6993	-0.6366	-0.6366
BLCA	TCGA-4Z-AA87-01A-11D-A390-01	0.8217	-0.2004	0.3013
BLCA	TCGA-BT-A20J-01A-11D-A14V-01	0.7124	-0.2766	0.5558
BLCA	TCGA-BT-A20R-01A-12D-A16M-01	0.667	-0.0446	-0.0446
BLCA	TCGA-BT-A20V-01A-11D-A14V-01	0.6703	-0.0347	-0.0347
BLCA	TCGA-BT-A2LA-01A-11D-A18E-01	0.5988	-0.3205	0.3249
BLCA	TCGA-BT-A2LB-01A-11D-A18E-01	0.5699	-0.045	0.2074
BLCA	TCGA-BT-A3PJ-01A-21D-A21Y-01	0.8497	-0.3111	0.5138
BLCA	TCGA-BT-A42C-01A-11D-A23L-01	0.6965	-0.0838	0.6126
BLCA	TCGA-C4-A0F6-01A-11D-A10T-01	0.7987	-0.2601	0.1404
BLCA	TCGA-CF-A3MF-01A-12D-A219-01	0.7102	-0.0537	0.3968
BLCA	TCGA-CF-A3MG-01A-11D-A20B-01	0.6475	-0.384	0.4418
BLCA	TCGA-CF-A8HY-01A-11D-A363-01	0.6526	-0.2484	0.8681
BLCA	TCGA-CU-A0YR-01A-12D-A10T-01	0.5965	-0.5709	0.5286
BLCA	TCGA-CU-A3KJ-01A-11D-A219-01	0.8063	-0.0303	-0.0303
BLCA	TCGA-DK-A1A3-01A-11D-A13V-01	0.5582	-0.2289	0.1801
BLCA	TCGA-DK-A1A5-01A-11D-A13V-01	0.6557	-0.0533	-0.0533
BLCA	TCGA-DK-A1A7-01A-11D-A13V-01	0.72	-0.1442	-0.1442
BLCA	TCGA-DK-A1AD-01A-11D-A13V-01	0.6019	-0.2608	-0.2608
BLCA	TCGA-DK-A2I2-01A-11D-A17S-01	0.7752	-0.0828	0.4294
BLCA	TCGA-DK-A2I6-01A-12D-A18E-01	0.7259	-0.068	0.3388
BLCA	TCGA-DK-A3IK-01A-32D-A219-01	0.794	-0.4134	0.3667
BLCA	TCGA-DK-A3IL-01A-11D-A20B-01	0.7589	-0.2702	0.7103
BLCA	TCGA-DK-A3WX-01A-22D-A22Y-01	0.5805	-0.2919	0.7461
BLCA	TCGA-DK-A3X1-01A-12D-A22Y-01	0.697	-0.2073	0.5087
BLCA	TCGA-DK-A3X2-01A-11D-A22Y-01	0.7139	-0.418	0.6401
BLCA	TCGA-DK-A6B1-01A-12D-A30D-01	0.6746	-0.149	0.6465
BLCA	TCGA-DK-A6B2-01A-11D-A30D-01	0.8073	-0.5126	0.4271
BLCA	TCGA-DK-AA6S-01A-21D-A390-01	0.5439	-0.0587	0.6819
BLCA	TCGA-DK-AA6W-01A-12D-A390-01	0.6875	-0.2523	0.3977
BLCA	TCGA-DK-AA71-01A-31D-A390-01	0.7796	-0.5463	0.7455
BLCA	TCGA-DK-AA75-01A-11D-A390-01	0.7893	-0.2618	0.527
BLCA	TCGA-E5-A4TZ-01A-11D-A31K-01	0.8981	-0.2124	-0.0785
BLCA	TCGA-E5-A4U1-01A-11D-A31K-01	0.7527	-0.2861	0.7205
BLCA	TCGA-E7-A5KE-01A-11D-A288-01	0.7981	-0.1154	-0.1154
BLCA	TCGA-E7-A6MD-01A-41D-A34T-01	0.7845	-0.0245	0.3992
BLCA	TCGA-E7-A6ME-01A-22D-A32A-01	0.6681	-0.2426	0.8044
BLCA	TCGA-E7-A97Q-01A-11D-A38F-01	0.7297	-0.2808	0.1768
BLCA	TCGA-FD-A3B6-01A-21D-A20B-01	0.5771	-0.2842	0.0882
BLCA	TCGA-FD-A3NA-01A-11D-A219-01	0.6325	-0.2685	0.1784
BLCA	TCGA-FD-A3SJ-01A-12D-A22Y-01	0.7285	-0.0039	-0.0039
BLCA	TCGA-FD-A43P-01A-31D-A23T-01	0.7968	-0.7108	0.4133
BLCA	TCGA-FD-A5C0-01A-11D-A288-01	0.5829	-0.576	0.0198
BLCA	TCGA-FD-A6TF-01A-52D-A32A-01	0.7132	-0.0096	0.5005
BLCA	TCGA-FJ-A3ZF-01A-11D-A23L-01	0.6685	-0.1944	0.2443
BLCA	TCGA-FT-A3EE-01A-11D-A201-01	0.7377	-0.1759	0.4307
BLCA	TCGA-G2-A2EF-01A-12D-A18E-01	0.676	-0.0112	-0.0112
BLCA	TCGA-G2-A2EO-01A-11D-A17S-01	0.6175	-0.0814	0.3284
BLCA	TCGA-GC-A3RB-01A-12D-A21Y-01	0.7882	-0.0371	0.0303
BLCA	TCGA-GC-A3RC-01A-11D-A22Y-01	0.6722	-0.2132	-0.2132
BLCA	TCGA-GD-A6C6-01A-21D-A31K-01	0.8521	-0.1614	0.2746
BLCA	TCGA-GU-AATP-01A-11D-A390-01	0.6614	-0.1325	0.1847
BLCA	TCGA-GU-AATQ-01A-11D-A390-01	0.6836	-0.4713	0.7817
BLCA	TCGA-GV-A3JV-01A-11D-A21Y-01	0.8369	-0.2865	0.5064
BLCA	TCGA-GV-A3JW-01A-11D-A20B-01	0.71	-0.2671	0.1592
BLCA	TCGA-GV-A3JZ-01A-11D-A219-01	0.7733	-0.5001	-0.5001
BLCA	TCGA-GV-A3QF-01A-31D-A22Y-01	0.6788	-0.5162	0.7897
BLCA	TCGA-GV-A3QH-01A-11D-A21Y-01	0.7407	-0.3821	0.2094
BLCA	TCGA-H4-A2HQ-01A-11D-A17S-01	0.9165	-0.1118	-0.1118
BLCA	TCGA-HQ-A2OE-01A-11D-A201-01	0.7617	-0.306	0.197
BLCA	TCGA-HQ-A2OF-01A-11D-A26L-01	0.7441	-0.1392	-0.1392
BLCA	TCGA-HQ-A5ND-01A-11D-A26L-01	0.656	-0.2567	-0.2567
BLCA	TCGA-K4-A3WV-01A-11D-A22Y-01	0.7449	-0.2115	0.55
BLCA	TCGA-K4-A6MB-01A-11D-A31K-01	0.7808	-0.2357	-0.2357
BLCA	TCGA-K4-AAQO-01A-11D-A38F-01	0.7271	-0.1622	0.2773
BLCA	TCGA-KQ-A41P-01A-12D-A338-01	0.6453	-0.3191	0.4462
BLCA	TCGA-KQ-A41Q-01A-11D-A338-01	0.6268	-0.4064	0.3852
BLCA	TCGA-KQ-A41S-01A-12D-A338-01	0.8034	-0.0946	-0.0946
BLCA	TCGA-PQ-A6FI-01A-11D-A31K-01	0.8078	-0.4929	-0.4929
BLCA	TCGA-SY-A9G5-01A-11D-A38F-01	0.6035	-0.2862	0.748
BLCA	TCGA-UY-A78K-01A-11D-A338-01	0.5982	-0.1052	0.067
BLCA	TCGA-UY-A78L-01A-12D-A338-01	0.9012	-0.4181	-0.4181
BLCA	TCGA-UY-A78N-01A-12D-A338-01	0.5155	-0.2711	0.667
BLCA	TCGA-UY-A8OB-01A-12D-A42D-01	0.6633	-0.0664	0.3011
BLCA	TCGA-UY-A9PE-01A-11D-A38F-01	0.5922	-0.1313	0.3232
BLCA	TCGA-UY-A9PH-01A-11D-A38F-01	0.5592	-0.704	0.8855
BLCA	TCGA-XF-A8HC-01A-11D-A363-01	0.645	-0.1548	0.2168
BLCA	TCGA-XF-A8HD-01A-11D-A363-01	0.7807	-0.5991	0.3522
BLCA	TCGA-XF-A8HG-01A-11D-A363-01	0.7431	-0.1049	0.5352
BLCA	TCGA-XF-A9SG-01A-12D-A42D-01	0.5598	-0.0606	-0.0606
BLCA	TCGA-XF-A9SK-01A-11D-A42D-01	0.6316	-0.1711	0.3001
BLCA	TCGA-XF-A9SP-01A-11D-A390-01	0.6477	-0.0107	0.033
BLCA	TCGA-XF-A9SU-01A-31D-A390-01	0.543	-0.2139	0.4077
BLCA	TCGA-XF-A9T3-01A-11D-A42D-01	0.8129	-0.1415	-0.1127
BLCA	TCGA-XF-A9T5-01A-11D-A42D-01	0.6513	-0.0234	-0.0234
BLCA	TCGA-XF-AAMG-01A-11D-A42D-01	0.8309	-0.2983	-0.2983
BLCA	TCGA-XF-AAMQ-01A-11D-A42D-01	0.6969	-0.0563	0.2512
BLCA	TCGA-XF-AAMY-01A-11D-A42D-01	0.8037	-0.3118	-0.3118
BLCA	TCGA-XF-AAMZ-01A-11D-A42D-01	0.595	-0.0737	-0.0737
BLCA	TCGA-YF-AA3M-01A-11D-A42D-01	0.847	-0.1542	-0.1542
BLCA	TCGA-ZF-A9R2-01A-11D-A390-01	0.7343	-0.1785	-0.1785
BLCA	TCGA-ZF-A9R4-01A-11D-A38F-01	0.6667	-0.5142	0.645
BLCA	TCGA-ZF-A9RD-01A-11D-A42D-01	0.7603	-0.2432	0.571
BLCA	TCGA-ZF-A9RG-01A-21D-A42D-01	0.6274	-0.6047	-0.6047
BLCA	TCGA-ZF-AA4N-01A-11D-A38F-01	0.7243	-0.147	-0.147
BLCA	TCGA-ZF-AA4X-01A-11D-A38F-01	0.6881	-0.0054	0.8252
BLCA	TCGA-ZF-AA51-01A-21D-A390-01	0.648	-0.1654	-0.1654
BLCA	TCGA-ZF-AA53-01A-11D-A390-01	0.6203	-0.0901	-0.3206
BLCA	TCGA-ZF-AA54-01A-11D-A390-01	0.7037	-0.3076	0.3932
BLCA	TCGA-ZF-AA56-01A-31D-A390-01	0.847	-0.5318	0.8672
BRCA	TCGA-3C-AAAU-01A-11D-A41E-01	0.6519	-0.1757	0.5662
BRCA	TCGA-3C-AALI-01A-11D-A41E-01	0.552	-0.2291	-0.2291
BRCA	TCGA-5T-A9QA-01A-11D-A41E-01	0.7701	-0.0348	-0.0348
BRCA	TCGA-A1-A0SF-01A-11D-A141-01	0.7594	-0.5622	0.3648
BRCA	TCGA-A1-A0SJ-01A-11D-A087-01	0.637	-0.1154	0.6041
BRCA	TCGA-A1-A0SO-01A-22D-A087-01	0.878	-0.0556	0.0152
BRCA	TCGA-A2-A04W-01A-31D-A111-01	0.6538	-0.2977	0.1728
BRCA	TCGA-A2-A0CU-01A-12D-A036-01	0.7371	-0.3258	-0.3258
BRCA	TCGA-A2-A0CV-01A-31D-A111-01	0.559	-0.4758	0.6402
BRCA	TCGA-A2-A0CX-01A-21D-A011-01	0.6291	-0.6816	0.3086
BRCA	TCGA-A2-A0D0-01A-11D-A011-01	0.7928	-0.2054	0.2102
BRCA	TCGA-A2-A0D2-01A-21D-A036-01	0.7515	-0.3829	0.3096
BRCA	TCGA-A2-A0EV-01A-11D-A036-01	0.7442	-0.5597	0.6789
BRCA	TCGA-A2-A0EY-01A-11D-A036-01	0.7715	-0.14	0.2626
BRCA	TCGA-A2-A0T2-01A-11D-A087-01	0.5996	-0.7123	0.7005
BRCA	TCGA-A2-A0YE-01A-11D-A107-01	0.8602	-0.0689	0.2018
BRCA	TCGA-A2-A0YG-01A-21D-A107-01	0.7259	-0.4013	0.586
BRCA	TCGA-A2-A0YH-01A-11D-A107-01	0.7238	-0.2462	-0.2462
BRCA	TCGA-A2-A0YM-01A-11D-A107-01	0.6994	-0.4408	-0.4408
BRCA	TCGA-A2-A1G1-01A-21D-A13J-01	0.769	-0.2206	0.1831
BRCA	TCGA-A2-A3XS-01A-11D-A22W-01	0.6734	-0.0234	-0.0234
BRCA	TCGA-A2-A3XX-01A-21D-A238-01	0.7457	-0.3889	0.1513
BRCA	TCGA-A2-A3Y0-01A-11D-A238-01	0.5869	-0.0231	0.2564
BRCA	TCGA-A2-A4S1-01A-21D-A25N-01	0.5157	-0.3452	0.715
BRCA	TCGA-A7-A0CD-01A-11D-A011-01	0.6244	-0.3585	0.9277
BRCA	TCGA-A7-A0CE-01A-11D-A011-01	0.7513	-0.1767	-0.1767
BRCA	TCGA-A7-A0CJ-01A-21D-A011-01	0.7574	-0.1052	0.4891
BRCA	TCGA-A7-A13D-01A-13D-A12N-01	0.7218	-0.099	0.5696
BRCA	TCGA-A7-A26I-01A-11D-A166-01	0.7859	-0.205	0.6997
BRCA	TCGA-A7-A4SB-01A-21D-A25N-01	0.6645	-0.4441	0.4379
BRCA	TCGA-A7-A4SF-01A-11D-A25N-01	0.7042	-0.2817	-0.2817
BRCA	TCGA-A7-A6VX-01A-12D-A33D-01	0.6715	-0.2473	-0.2473
BRCA	TCGA-A8-A06Q-01A-11D-A036-01	0.6045	-0.2932	0.4793
BRCA	TCGA-A8-A07Z-01A-11D-A011-01	0.8523	-0.5972	0.323
BRCA	TCGA-A8-A081-01A-11D-A011-01	0.6394	-0.052	0.1459
BRCA	TCGA-A8-A08B-01A-11D-A011-01	0.5616	-0.0172	0.5915
BRCA	TCGA-A8-A08F-01A-11D-A011-01	0.6463	-0.1549	0.2017
BRCA	TCGA-A8-A08G-01A-11D-A011-01	0.5939	-0.0999	0.4856
BRCA	TCGA-A8-A08J-01A-11D-A011-01	0.7095	-0.127	0.1472
BRCA	TCGA-A8-A091-01A-11D-A011-01	0.6769	-0.7337	0.6862
BRCA	TCGA-A8-A093-01A-11D-A011-01	0.6033	-0.4821	0.8978
BRCA	TCGA-A8-A097-01A-11D-A036-01	0.6177	-0.1871	0.3961
BRCA	TCGA-A8-A09B-01A-11D-A011-01	0.7465	-0.0561	0.6357
BRCA	TCGA-A8-A09C-01A-11D-A011-01	0.6771	-0.4237	-0.4237
BRCA	TCGA-A8-A09E-01A-11D-A011-01	0.6049	-0.2631	0.4291
BRCA	TCGA-A8-A09K-01A-11D-A011-01	0.695	-0.4073	0.8259
BRCA	TCGA-A8-A09R-01A-11D-A011-01	0.6207	-0.3851	0.306
BRCA	TCGA-A8-A09X-01A-11D-A011-01	0.6658	-0.1845	0.2739
BRCA	TCGA-AC-A23E-01A-11D-A160-01	0.5845	-0.3947	0.8224
BRCA	TCGA-AC-A23G-01A-11D-A20R-01	0.7348	-0.446	1
BRCA	TCGA-AC-A23H-01A-11D-A160-01	0.6756	-0.4569	0.1843
BRCA	TCGA-AC-A2FM-01A-11D-A19X-01	0.6252	-0.2435	0.676
BRCA	TCGA-AC-A2QJ-01A-12D-A19X-01	0.632	-0.0721	0.3256
BRCA	TCGA-AC-A62X-01A-11D-A29M-01	0.6977	-0.4474	-0.4474
BRCA	TCGA-AC-A6IW-01A-12D-A33D-01	0.8325	-0.094	0.451
BRCA	TCGA-AC-A8OQ-01A-11D-A41E-01	0.7719	-0.269	-0.269
BRCA	TCGA-AN-A03Y-01A-21D-A011-01	0.6357	-0.3353	0.8169
BRCA	TCGA-AN-A04C-01A-21D-A036-01	0.6474	-0.1143	0.748
BRCA	TCGA-AN-A0AJ-01A-11D-A011-01	0.6326	-0.1267	0.213
BRCA	TCGA-AN-A0FK-01A-11D-A036-01	0.5187	-0.7351	-0.7351
BRCA	TCGA-AN-A0FV-01A-11D-A011-01	0.7068	-0.1777	-0.1777
BRCA	TCGA-AN-A0FW-01A-11D-A036-01	0.6438	-0.4542	0.3383
BRCA	TCGA-AN-A0FX-01A-11D-A036-01	0.8632	-0.2274	0.3893
BRCA	TCGA-AN-A0FY-01A-11D-A036-01	0.725	-0.5151	0.8781
BRCA	TCGA-AN-A0FZ-01A-11D-A036-01	0.7961	-0.0756	0.4864
BRCA	TCGA-AN-A0XN-01A-21D-A107-01	0.6605	-0.0086	-0.2123
BRCA	TCGA-AO-A03N-01B-11D-A10L-01	0.7115	-0.4683	-0.4683
BRCA	TCGA-AO-A03O-01A-11D-A011-01	0.8287	-0.2966	0.4559
BRCA	TCGA-AO-A0J2-01A-11D-A036-01	0.6836	-0.0817	0.1467
BRCA	TCGA-AO-A0J3-01A-11D-A036-01	0.7229	-0.1796	-0.1796
BRCA	TCGA-AO-A0JL-01A-11D-A059-01	0.7688	-0.1336	0.3681
BRCA	TCGA-AO-A0JM-01A-21D-A059-01	0.7496	-0.1053	0.3709
BRCA	TCGA-AO-A12A-01A-21D-A111-01	0.5386	-0.5628	-0.5628
BRCA	TCGA-AO-A12B-01A-11D-A10L-01	0.5704	-0.9311	0.8402
BRCA	TCGA-AO-A12D-01A-11D-A111-01	0.702	-0.5083	-0.5083
BRCA	TCGA-AO-A12F-01A-11D-A111-01	0.7851	-0.1784	-0.1784
BRCA	TCGA-AO-A1KQ-01A-11D-A13J-01	0.7473	-0.2432	-0.2432
BRCA	TCGA-AQ-A04H-01B-11D-A10L-01	0.7549	-0.3025	0.2152
BRCA	TCGA-AQ-A04L-01B-21D-A10L-01	0.781	-0.1746	-0.1746
BRCA	TCGA-AQ-A0Y5-01A-11D-A14J-01	0.7049	-0.3874	0.3924
BRCA	TCGA-AQ-A54N-01A-11D-A25N-01	0.7842	-0.2624	0.7928
BRCA	TCGA-AR-A0TS-01A-11D-A111-01	0.5676	-0.0189	0.2215
BRCA	TCGA-AR-A0TW-01A-11D-A087-01	0.6937	-0.2477	0.4748
BRCA	TCGA-AR-A0U0-01A-11D-A107-01	0.6498	-0.3166	0.2668
BRCA	TCGA-AR-A0U2-01A-11D-A107-01	0.6164	-0.0488	0.1012
BRCA	TCGA-AR-A1AI-01A-11D-A12N-01	0.7784	-0.1162	0.4711
BRCA	TCGA-AR-A1AV-01A-21D-A12N-01	0.6658	-0.6931	0.6351
BRCA	TCGA-AR-A24K-01A-11D-A166-01	0.6562	-0.087	0.8389
BRCA	TCGA-AR-A24Q-01A-12D-A166-01	0.7665	-0.3258	0.3325
BRCA	TCGA-AR-A24Z-01A-11D-A166-01	0.7187	-0.3176	-0.3176
BRCA	TCGA-AR-A251-01A-12D-A166-01	0.8603	-0.1321	-0.1321
BRCA	TCGA-AR-A2LK-01A-11D-A17U-01	0.7012	-0.0315	0.3397
BRCA	TCGA-B6-A0I2-01A-11D-A036-01	0.6904	-0.4937	0.4866
BRCA	TCGA-B6-A0IB-01A-11D-A036-01	0.5829	-0.6027	-0.6027
BRCA	TCGA-B6-A0IJ-01A-11D-A036-01	0.7403	-0.0329	-0.0179
BRCA	TCGA-B6-A0IO-01A-11D-A036-01	0.6186	-0.1291	0.4502
BRCA	TCGA-B6-A0RO-01A-22D-A087-01	0.6476	-0.4831	0.573
BRCA	TCGA-B6-A0X1-01A-11D-A107-01	0.7327	-0.2957	0.4437
BRCA	TCGA-B6-A1KF-01A-11D-A13J-01	0.7087	-0.3359	0.2577
BRCA	TCGA-B6-A1KI-01A-11D-A14J-01	0.6408	-0.3799	0.6531
BRCA	TCGA-B6-A400-01A-11D-A238-01	0.7977	-0.0381	-0.0381
BRCA	TCGA-B6-A401-01A-11D-A238-01	0.7419	-0.2546	0.3168
BRCA	TCGA-B6-A402-01A-11D-A238-01	0.7487	-0.1357	-0.1357
BRCA	TCGA-BH-A0AU-01A-11D-A12N-01	0.5173	-0.2482	0.536
BRCA	TCGA-BH-A0AW-01A-11D-A059-01	0.6949	-0.6298	0.6208
BRCA	TCGA-BH-A0AY-01A-21D-A011-01	0.6786	-0.3671	0.8359
BRCA	TCGA-BH-A0BA-01A-11D-A059-01	0.6344	-0.173	0.9678
BRCA	TCGA-BH-A0BG-01A-11D-A111-01	0.6604	-0.1691	0.4868
BRCA	TCGA-BH-A0BJ-01A-11D-A059-01	0.6305	-0.5671	-0.5671
BRCA	TCGA-BH-A0BT-01A-11D-A12N-01	0.6251	-0.1212	0.8422
BRCA	TCGA-BH-A0BZ-01A-31D-A12N-01	0.7456	-0.3571	0.4455
BRCA	TCGA-BH-A0C0-01A-21D-A059-01	0.7012	-0.0019	0.2793
BRCA	TCGA-BH-A0DD-01A-31D-A12N-01	0.756	-0.1308	0.3167
BRCA	TCGA-BH-A0DL-01A-11D-A111-01	0.7057	-0.4521	0.6848
BRCA	TCGA-BH-A0DP-01A-21D-A059-01	0.6534	-0.5895	-0.5895
BRCA	TCGA-BH-A0E6-01A-11D-A036-01	0.7339	-0.371	0.3778
BRCA	TCGA-BH-A0GY-01A-11D-A059-01	0.7829	-0.2585	0.6491
BRCA	TCGA-BH-A0H7-01A-13D-A059-01	0.6403	-0.0369	-0.0369
BRCA	TCGA-BH-A0HQ-01A-11D-A036-01	0.7316	-0.6562	0.8099
BRCA	TCGA-BH-A0HY-01A-11D-A059-01	0.7386	-0.3878	0.3033
BRCA	TCGA-BH-A18L-01A-32D-A12A-01	0.7496	-0.1474	0.7492
BRCA	TCGA-BH-A18N-01A-11D-A12A-01	0.6811	-0.6649	0.9141
BRCA	TCGA-BH-A18Q-01A-12D-A12A-01	0.6832	-0.0241	0.585
BRCA	TCGA-BH-A18T-01A-11D-A12A-01	0.7318	-0.2428	0.5458
BRCA	TCGA-BH-A18U-01A-21D-A12A-01	0.8132	-0.0465	-0.0465
BRCA	TCGA-BH-A18V-01A-11D-A12A-01	0.7584	-0.2625	0.8319
BRCA	TCGA-BH-A1EO-01A-11D-A134-01	0.6768	-0.3851	0.8363
BRCA	TCGA-BH-A1EV-01A-11D-A134-01	0.6127	-0.2867	0.5661
BRCA	TCGA-BH-A1F2-01A-31D-A13J-01	0.6983	-0.2879	0.2754
BRCA	TCGA-BH-A1FC-01A-11D-A13J-01	0.6734	-0.0794	0.6857
BRCA	TCGA-BH-A1FU-01A-11D-A14F-01	0.5422	-0.0925	0.1413
BRCA	TCGA-BH-A202-01A-11D-A14J-01	0.5718	-0.4918	0.7627
BRCA	TCGA-BH-A208-01A-11D-A160-01	0.7134	-0.2051	-0.2051
BRCA	TCGA-C8-A12L-01A-11D-A111-01	0.747	-0.2294	0.4396
BRCA	TCGA-C8-A12O-01A-11D-A111-01	0.6137	-0.1664	0.5254
BRCA	TCGA-C8-A12V-01A-11D-A111-01	0.6931	-0.0434	0.2718
BRCA	TCGA-C8-A12W-01A-11D-A111-01	0.7809	-0.0573	-0.0573
BRCA	TCGA-C8-A130-01A-31D-A111-01	0.6168	-0.0818	0.3804
BRCA	TCGA-C8-A1HG-01A-11D-A134-01	0.7177	-0.3679	0.3992
BRCA	TCGA-C8-A26Y-01A-11D-A16C-01	0.6796	-0.0711	-0.0711
BRCA	TCGA-C8-A26Z-01A-11D-A16C-01	0.6996	-0.3413	0.4554
BRCA	TCGA-C8-A274-01A-11D-A16C-01	0.6401	-0.4804	0.4206
BRCA	TCGA-D8-A13Z-01A-11D-A111-01	0.6187	-0.0122	-0.0122
BRCA	TCGA-D8-A143-01A-11D-A111-01	0.8134	-0.0719	-0.0473
BRCA	TCGA-D8-A147-01A-11D-A111-01	0.8049	-0.2548	0.3702
BRCA	TCGA-D8-A1J8-01A-11D-A13J-01	0.5932	-0.2692	0.8217
BRCA	TCGA-D8-A1JE-01A-11D-A13J-01	0.5677	-0.5398	0.0513
BRCA	TCGA-D8-A1JF-01A-11D-A13J-01	0.7196	-0.4473	-0.4473
BRCA	TCGA-D8-A1JL-01A-11D-A13J-01	0.8547	-0.1396	0.2653
BRCA	TCGA-D8-A1XF-01A-11D-A14F-01	0.6609	-0.3263	0.7495
BRCA	TCGA-D8-A1XK-01A-21D-A14J-01	0.7824	-0.0328	-0.0328
BRCA	TCGA-D8-A1XY-01A-11D-A14J-01	0.7784	-0.0787	0.7151
BRCA	TCGA-D8-A1Y1-01A-21D-A14J-01	0.8897	-0.2326	0.4111
BRCA	TCGA-D8-A1Y3-01A-11D-A160-01	0.8263	-0.0496	-0.0496
BRCA	TCGA-D8-A27R-01A-11D-A16C-01	0.5657	-0.2425	0.7141
BRCA	TCGA-E2-A10B-01A-11D-A10L-01	0.7548	-0.7248	0.1922
BRCA	TCGA-E2-A14N-01A-31D-A134-01	0.7522	-0.0452	-0.0452
BRCA	TCGA-E2-A14R-01A-11D-A111-01	0.7943	-0.0969	-0.0969
BRCA	TCGA-E2-A14T-01A-11D-A111-01	0.7077	-0.0738	-0.0147
BRCA	TCGA-E2-A14X-01A-11D-A111-01	0.8491	-0.3865	-0.3865
BRCA	TCGA-E2-A150-01A-11D-A12A-01	0.6749	-0.0603	-0.0603
BRCA	TCGA-E2-A153-01A-12D-A12A-01	0.6284	-0.0945	0.4586
BRCA	TCGA-E2-A15M-01A-11D-A12A-01	0.7553	-0.0956	0.5673
BRCA	TCGA-E2-A1IH-01A-11D-A13J-01	0.6073	-0.5496	0.5895
BRCA	TCGA-E2-A1II-01A-11D-A141-01	0.591	-0.0318	0.7315
BRCA	TCGA-E2-A1L8-01A-11D-A13J-01	0.6447	-0.6091	0.5858
BRCA	TCGA-E2-A1LG-01A-21D-A14J-01	0.6856	-0.1335	0.2887
BRCA	TCGA-E2-A1LL-01A-11D-A141-01	0.7439	-0.2636	-0.2636
BRCA	TCGA-E2-A2P5-01A-11D-A19X-01	0.5066	-0.4869	-0.4869
BRCA	TCGA-E2-A56Z-01A-12D-A29M-01	0.5582	-0.2867	0.2998
BRCA	TCGA-E2-A573-01A-11D-A29M-01	0.7851	-0.3083	-0.3083
BRCA	TCGA-E2-A9RU-01A-11D-A41E-01	0.7642	-0.2235	0.5136
BRCA	TCGA-E9-A1ND-01A-11D-A141-01	0.8686	-0.3691	0.3206
BRCA	TCGA-E9-A1NF-01A-11D-A14F-01	0.7249	-0.0484	-0.0484
BRCA	TCGA-E9-A1R4-01A-21D-A14F-01	0.598	-0.0075	-0.0075
BRCA	TCGA-E9-A1R6-01A-11D-A14F-01	0.7773	-0.3292	0.5491
BRCA	TCGA-E9-A1RA-01A-11D-A14F-01	0.5552	-0.3608	-0.3608
BRCA	TCGA-E9-A1RB-01A-11D-A160-01	0.6533	-0.2939	0.4638
BRCA	TCGA-E9-A1RC-01A-11D-A160-01	0.7834	-0.3738	0.7061
BRCA	TCGA-E9-A1RD-01A-11D-A160-01	0.8078	-0.6635	0.7265
BRCA	TCGA-E9-A1RE-01A-11D-A160-01	0.8055	-0.0815	-0.0815
BRCA	TCGA-E9-A1RG-01A-11D-A14F-01	0.7148	-0.1638	0.2397
BRCA	TCGA-E9-A243-01A-21D-A166-01	0.5753	-0.2156	-0.2156
BRCA	TCGA-E9-A244-01A-11D-A166-01	0.7564	-0.1249	-0.1249
BRCA	TCGA-E9-A248-01A-11D-A166-01	0.691	-0.0698	0.246
BRCA	TCGA-E9-A2JS-01A-11D-A17U-01	0.8049	-0.2086	-0.2086
BRCA	TCGA-EW-A1J6-01A-11D-A13J-01	0.5575	-0.2701	0.7947
BRCA	TCGA-EW-A1OY-01A-11D-A141-01	0.673	-0.0422	0.081
BRCA	TCGA-EW-A1P4-01A-21D-A141-01	0.7729	-0.2869	0.7974
BRCA	TCGA-EW-A1P7-01A-21D-A141-01	0.6631	-0.2954	0.2954
BRCA	TCGA-EW-A1P8-01A-11D-A141-01	0.6068	-0.0423	0.5938
BRCA	TCGA-EW-A1PB-01A-11D-A141-01	0.6886	-0.6932	0.7718
BRCA	TCGA-EW-A1PH-01A-11D-A14J-01	0.7461	-0.0915	0.3887
BRCA	TCGA-EW-A6SA-01A-21D-A32H-01	0.8112	-0.4377	-0.4377
BRCA	TCGA-GI-A2C8-01A-11D-A16C-01	0.7096	-0.065	0.2601
BRCA	TCGA-GM-A2DB-01A-31D-A18N-01	0.6547	-0.3305	0.4876
BRCA	TCGA-LL-A5YP-01A-21D-A28A-01	0.7085	-0.1775	-0.1775
BRCA	TCGA-LL-A6FP-01A-11D-A31T-01	0.7966	-0.7412	0.8048
BRCA	TCGA-LL-A6FQ-01A-11D-A31T-01	0.573	-0.8794	0.9468
BRCA	TCGA-LL-A6FR-01A-12D-A31T-01	0.7849	-0.0506	-0.0506
BRCA	TCGA-LL-A73Y-01A-11D-A33D-01	0.9386	-0.1822	-0.1822
BRCA	TCGA-MS-A51U-01A-31D-A25N-01	0.7221	-0.6157	0.7628
BRCA	TCGA-OL-A6VO-01A-12D-A33D-01	0.8287	-0.039	0.0348
BRCA	TCGA-PE-A5DE-01A-11D-A27O-01	0.6892	-0.6127	0.0419
BRCA	TCGA-PL-A8LZ-01A-31D-A36I-01	0.8298	-0.3573	0.468
BRCA	TCGA-UL-AAZ6-01A-11D-A41E-01	0.5513	-0.3632	0.3954
BRCA	TCGA-UU-A93S-01A-21D-A41E-01	0.8254	-0.2007	0.2946
CESC	TCGA-BI-A0VS-01A-11D-A10T-01	0.8059	-0.1858	-0.1858
CESC	TCGA-C5-A1M6-01A-11D-A13V-01	0.629	-0.2462	0.3206
CESC	TCGA-C5-A1M9-01A-11D-A13V-01	0.608	-0.2992	0.7471
CESC	TCGA-C5-A1ME-01A-11D-A13V-01	0.7646	-0.3854	0.4986
CESC	TCGA-C5-A2LV-01A-11D-A18H-01	0.7642	-0.3059	0.3979
CESC	TCGA-C5-A2LX-01A-11D-A18H-01	0.7566	-0.5139	0.6481
CESC	TCGA-C5-A7CH-01A-11D-A33N-01	0.8667	-0.0718	0.5226
CESC	TCGA-C5-A7CO-01A-11D-A350-01	0.7785	-0.3067	0.6578
CESC	TCGA-C5-A7X5-01A-11D-A36I-01	0.6787	-0.1862	0.4161
CESC	TCGA-C5-A8XH-01A-11D-A37M-01	0.7807	-0.2161	-0.2161
CESC	TCGA-DG-A2KH-01A-21D-A22W-01	0.5563	-0.3733	0.5971
CESC	TCGA-DG-A2KJ-01A-11D-A18H-01	0.6801	-0.1891	0.6751
CESC	TCGA-DG-A2KL-01A-11D-A17U-01	0.5448	-0.8172	0.5817
CESC	TCGA-EK-A2PM-01A-11D-A18H-01	0.6533	-0.3413	0.7297
CESC	TCGA-EK-A2RA-01A-11D-A18H-01	0.8088	-0.1016	-0.1016
CESC	TCGA-EK-A2RN-01A-12D-A20T-01	0.8314	-0.1317	0.517
CESC	TCGA-FU-A3TX-01A-11D-A22W-01	0.7362	-0.622	0.7572
CESC	TCGA-FU-A40J-01A-11D-A242-01	0.5619	-0.6503	0.382
CESC	TCGA-HM-A3JJ-01A-21D-A21P-01	0.6388	-0.5809	0.6627
CESC	TCGA-HM-A3JK-01A-11D-A21P-01	0.8717	-0.5289	1
CESC	TCGA-JX-A3Q8-01A-11D-A21P-01	0.5648	-0.7312	0.7278
CESC	TCGA-JX-A5QV-01A-22D-A28A-01	0.614	-0.4674	0.1917
CESC	TCGA-LP-A4AU-01A-32D-A242-01	0.6367	-0.4743	0.4127
CESC	TCGA-MA-AA3X-01A-22D-A42N-01	0.6996	-0.2837	-0.2837
CESC	TCGA-MA-AA43-01A-11D-A42N-01	0.7676	-0.2048	-0.2048
CESC	TCGA-Q1-A6DT-01A-11D-A32H-01	0.6627	-0.123	-0.123
CESC	TCGA-VS-A8EC-01A-11D-A36I-01	0.8124	-0.071	-0.071
CESC	TCGA-VS-A8EH-01A-11D-A36I-01	0.729	-0.2778	-0.2778
CESC	TCGA-VS-A8EI-01A-11D-A37M-01	0.6713	-0.1899	0.4964
CESC	TCGA-VS-A8QF-01A-21D-A37M-01	0.7314	-0.0409	-0.0409
CESC	TCGA-VS-A959-01A-11D-A42N-01	0.6199	-0.0923	-0.0499
CESC	TCGA-VS-A9U5-01A-11D-A42N-01	0.5971	-0.0946	0.317
CESC	TCGA-VS-A9UH-01A-11D-A42N-01	0.568	-0.3739	0.4832
CESC	TCGA-VS-A9UI-01A-11D-A42N-01	0.7116	-0.0936	0.6664
CESC	TCGA-VS-A9UL-01A-11D-A42N-01	0.7267	-0.2336	0.1636
CESC	TCGA-VS-A9V3-01A-11D-A42N-01	0.6287	-0.1765	0.6092
CESC	TCGA-VS-A9V4-01A-12D-A42N-01	0.8146	-0.2085	-0.2085
CESC	TCGA-ZJ-AAXB-01A-11D-A42N-01	0.5458	-0.487	0.5602
CESC	TCGA-ZJ-AAXD-01A-21D-A42N-01	0.6381	-0.7312	0.6031
CESC	TCGA-ZJ-AAXF-01A-31D-A42N-01	0.633	-0.4929	0.5853
CESC	TCGA-ZJ-AB0H-01A-11D-A42N-01	0.739	-0.4048	0.7307
CHOL	TCGA-3X-AAVB-01A-31D-A416-01	0.5719	-0.1215	0.6464
CHOL	TCGA-3X-AAVC-01A-21D-A416-01	0.806	-0.1927	0.7749
CHOL	TCGA-4G-AAZT-01A-11D-A416-01	0.5938	-0.4584	0.7506
CHOL	TCGA-W5-AA2X-01A-11D-A416-01	0.5633	-0.1288	0.6573
CHOL	TCGA-W5-AA31-01A-11D-A416-01	0.5463	-0.1767	0.5596
CHOL	TCGA-ZD-A8I3-01A-11D-A416-01	0.5017	-0.5729	0.8603
CHOL	TCGA-ZH-A8Y2-01A-11D-A416-01	0.6676	-0.1489	0.5998
COAD	TCGA-3L-AA1B-01A-11D-A36W-01	0.7202	-0.5402	0.7353
COAD	TCGA-4T-AA8H-01A-11D-A40O-01	0.8492	-0.5789	0.8047
COAD	TCGA-5M-AATE-01A-11D-A40O-01	0.7084	-0.1159	-0.1159
COAD	TCGA-A6-2679-01A-02D-1549-01	0.7663	-0.1472	0.5382
COAD	TCGA-A6-2680-01A-01D-1549-01	0.7424	-0.2948	0.2843
COAD	TCGA-A6-2681-01A-01D-1549-01	0.7198	-0.3619	0.8146
COAD	TCGA-A6-2686-01A-01D-1549-01	0.5973	-0.1333	0.5291
COAD	TCGA-A6-3807-01A-01D-1018-01	0.8011	-0.2911	0.2811
COAD	TCGA-A6-4105-01A-02D-1770-01	0.8089	-0.1624	0.3712
COAD	TCGA-A6-4107-01A-02D-1549-01	0.7723	-0.3298	0.4304
COAD	TCGA-A6-5660-01A-01D-1649-01	0.8552	-0.3781	-0.3781
COAD	TCGA-A6-5667-01A-21D-1717-01	0.7089	-0.2527	0.268
COAD	TCGA-A6-6142-01A-11D-1770-01	0.6379	-0.4749	0.6154
COAD	TCGA-A6-6648-01A-11D-1770-01	0.7791	-0.2959	0.6761
COAD	TCGA-A6-6649-01A-11D-1770-01	0.6308	-0.2014	0.5397
COAD	TCGA-A6-A56B-01A-31D-A28F-01	0.8113	-0.0088	-0.0088
COAD	TCGA-AA-3488-01A-01D-1406-01	0.6406	-0.2167	-0.2167
COAD	TCGA-AA-3494-01A-01D-1406-01	0.7153	-0.4399	-0.4399
COAD	TCGA-AA-3521-01A-01D-1549-01	0.8388	-0.3544	0.6417
COAD	TCGA-AA-3532-01A-01D-1549-01	0.7831	-0.0886	-0.0886
COAD	TCGA-AA-3542-01A-02D-0819-01	0.676	-0.5572	0.7188
COAD	TCGA-AA-3553-01A-01D-0819-01	0.6836	-0.747	0.8303
COAD	TCGA-AA-3560-01A-01D-0819-01	0.7185	-0.1427	0.8113
COAD	TCGA-AA-3562-01A-02D-0819-01	0.7386	-0.152	0.6383
COAD	TCGA-AA-3662-01A-01D-1717-01	0.7557	-0.1947	0.5206
COAD	TCGA-AA-3695-01A-01D-0903-01	0.5869	-0.4162	0.5557
COAD	TCGA-AA-3712-01A-21D-1717-01	0.783	-0.0093	0.1133
COAD	TCGA-AA-3837-01A-01D-0903-01	0.7033	-0.6635	0.5046
COAD	TCGA-AA-3842-01A-01D-1018-01	0.753	-0.1904	-0.1904
COAD	TCGA-AA-3846-01A-01D-1018-01	0.7427	-0.6007	0.824
COAD	TCGA-AA-3851-01A-01D-1018-01	0.6286	-0.5021	0.6498
COAD	TCGA-AA-3856-01A-01D-0903-01	0.691	-0.3571	0.6751
COAD	TCGA-AA-3869-01A-01D-1018-01	0.6991	-0.7492	0.9686
COAD	TCGA-AA-3872-01A-01D-1018-01	0.6996	-0.1208	0.3175
COAD	TCGA-AA-3941-01A-01D-1018-01	0.8703	-0.1742	-0.1742
COAD	TCGA-AA-3955-01A-02D-1018-01	0.7876	-0.5592	0.836
COAD	TCGA-AA-3968-01A-01D-1018-01	0.5932	-0.3946	0.368
COAD	TCGA-AA-3976-01A-01D-1018-01	0.6782	-0.4719	0.6435
COAD	TCGA-AA-3982-01A-02D-1018-01	0.7562	-0.4296	0.5707
COAD	TCGA-AA-A00F-01A-01D-A003-01	0.6797	-0.2425	-0.2425
COAD	TCGA-AA-A01C-01A-01D-A008-01	0.6565	-0.6566	0.577
COAD	TCGA-AA-A01D-01A-01D-A008-01	0.7218	-0.4473	0.3155
COAD	TCGA-AA-A01F-01A-01D-A003-01	0.6325	-0.6619	0.8448
COAD	TCGA-AA-A01X-01A-21D-A080-01	0.54	-0.7581	0.449
COAD	TCGA-AA-A02W-01A-01D-A008-01	0.6355	-0.3028	0.5991
COAD	TCGA-AD-6888-01A-11D-1923-01	0.7487	-0.6403	0.9559
COAD	TCGA-AD-6890-01A-11D-1923-01	0.8814	-0.3331	0.6666
COAD	TCGA-AD-6901-01A-11D-1923-01	0.6839	-0.1144	0.3354
COAD	TCGA-AD-6963-01A-11D-1923-01	0.681	-0.5271	0.6648
COAD	TCGA-AU-3779-01A-01D-1717-01	0.8138	-0.1229	0.3684
COAD	TCGA-AY-4071-01A-01D-1427-01	0.8192	-0.0812	-0.0812
COAD	TCGA-AY-A8YK-01A-11D-A40O-01	0.8542	-0.3165	0.6111
COAD	TCGA-AZ-4616-01A-21D-1834-01	0.6602	-0.8011	-0.8011
COAD	TCGA-AZ-6600-01A-11D-1770-01	0.6706	-0.5581	-0.0531
COAD	TCGA-AZ-6607-01A-11D-1834-01	0.5581	-0.0946	0.485
COAD	TCGA-AZ-6608-01A-11D-1834-01	0.6514	-0.4235	0.559
COAD	TCGA-CA-5254-01A-21D-1834-01	0.6944	-0.1858	0.7719
COAD	TCGA-CA-5255-01A-11D-1834-01	0.6999	-0.3771	0.5116
COAD	TCGA-CA-5797-01A-01D-1649-01	0.8311	-0.3386	0.2002
COAD	TCGA-CK-4948-01B-11D-1649-01	0.602	-0.1745	0.3606
COAD	TCGA-CK-5914-01A-11D-1649-01	0.8226	-0.6485	0.6998
COAD	TCGA-CK-6748-01A-11D-1834-01	0.7793	-0.4994	0.3875
COAD	TCGA-CM-4744-01A-01D-1406-01	0.7815	-0.8004	0.6199
COAD	TCGA-CM-4747-01A-01D-1406-01	0.6545	-0.57	0.5253
COAD	TCGA-CM-4752-01A-01D-1406-01	0.642	-0.0536	-0.0536
COAD	TCGA-CM-5344-01A-21D-1717-01	0.852	-0.0293	-0.0293
COAD	TCGA-CM-5860-01A-01D-1649-01	0.7672	-0.6129	0.6663
COAD	TCGA-CM-5864-01A-01D-1649-01	0.584	-0.2051	0.428
COAD	TCGA-CM-6163-01A-11D-1649-01	0.8497	-0.0372	0.8226
COAD	TCGA-CM-6164-01A-11D-1649-01	0.5235	-0.1473	0.7419
COAD	TCGA-CM-6676-01A-11D-1834-01	0.5845	-0.0855	0.0818
COAD	TCGA-CM-6679-01A-11D-1834-01	0.7769	-0.4712	0.7517
COAD	TCGA-D5-5537-01A-21D-1923-01	0.7655	-0.6096	0.3695
COAD	TCGA-D5-5539-01A-01D-1649-01	0.6558	-0.8005	0.9703
COAD	TCGA-D5-6535-01A-11D-1717-01	0.677	-0.4481	0.5049
COAD	TCGA-D5-6538-01A-11D-1717-01	0.8797	-0.3187	-0.3187
COAD	TCGA-D5-6922-01A-11D-1923-01	0.7311	-0.301	0.508
COAD	TCGA-DM-A1D8-01A-11D-A151-01	0.7709	-0.2729	-0.1199
COAD	TCGA-DM-A288-01A-11D-A16U-01	0.6523	-0.4902	0.3301
COAD	TCGA-DM-A28M-01A-12D-A16U-01	0.8158	-0.4369	0.4942
COAD	TCGA-F4-6855-01A-11D-1923-01	0.6753	-0.2776	0.3972
COAD	TCGA-G4-6299-01A-11D-1770-01	0.7472	-0.0276	0.0963
COAD	TCGA-G4-6303-01A-11D-1770-01	0.72	-0.0379	-0.0379
COAD	TCGA-G4-6307-01A-11D-1717-01	0.6426	-0.8104	0.6461
COAD	TCGA-G4-6310-01A-11D-1717-01	0.737	-0.5827	0.3703
COAD	TCGA-G4-6314-01A-11D-1717-01	0.7141	-0.5614	0.6902
COAD	TCGA-G4-6627-01A-11D-1770-01	0.5153	-0.071	0.4814
COAD	TCGA-NH-A50U-01A-33D-A36W-01	0.5688	-0.4834	0.1113
COAD	TCGA-NH-A6GC-01A-12D-A40O-01	0.6415	-0.3567	0.8263
COAD	TCGA-NH-A8F7-01A-11D-A40O-01	0.7264	-0.6243	-0.1261
COAD	TCGA-QG-A5YW-01A-11D-A28F-01	0.6321	-0.3699	0.1425
COAD	TCGA-RU-A8FL-01A-11D-A36W-01	0.6226	-0.1938	0.9214
DLBC	TCGA-FF-8041-01A-11D-2209-01	0.6092	-0.9285	0.9201
ESCA	TCGA-2H-A9GF-01A-11D-A37B-01	0.7281	-0.3875	0.2724
ESCA	TCGA-2H-A9GH-01A-11D-A37B-01	0.7919	-0.0756	-0.0756
ESCA	TCGA-2H-A9GI-01A-11D-A37B-01	0.7492	-0.3678	0.2068
ESCA	TCGA-2H-A9GL-01A-12D-A37B-01	0.8587	-0.2356	0.4075
ESCA	TCGA-2H-A9GM-01A-11D-A37B-01	0.8383	-0.1838	0.2328
ESCA	TCGA-2H-A9GQ-01A-11D-A37B-01	0.6913	-0.5006	0.4544
ESCA	TCGA-IG-A3Y9-01A-12D-A246-01	0.5744	-0.4847	-0.4847
ESCA	TCGA-IG-A3YB-01A-11D-A246-01	0.8413	-0.0357	-0.0357
ESCA	TCGA-IG-A50L-01A-11D-A25X-01	0.7194	-0.1788	-0.1788
ESCA	TCGA-JY-A6F8-01A-11D-A33D-01	0.8202	-0.0509	-0.0509
ESCA	TCGA-JY-A6FB-01A-11D-A33D-01	0.6712	-0.1503	-0.1503
ESCA	TCGA-JY-A93D-01A-11D-A386-01	0.5254	-0.031	-0.031
ESCA	TCGA-JY-A93E-01A-11D-A37B-01	0.7191	-0.0441	0.2857
ESCA	TCGA-L5-A43J-01A-12D-A246-01	0.684	-0.229	0.4218
ESCA	TCGA-L5-A4OG-01A-11D-A25X-01	0.7428	-0.368	0.3286
ESCA	TCGA-L5-A4OU-01A-11D-A28A-01	0.783	-0.7003	0.6414
ESCA	TCGA-L5-A88Y-01A-11D-A350-01	0.8183	-0.1698	-0.1275
ESCA	TCGA-L5-A891-01A-11D-A36I-01	0.7483	-0.1752	0.472
ESCA	TCGA-L5-A8NE-01A-11D-A37B-01	0.6011	-0.0138	-0.0138
ESCA	TCGA-L5-A8NJ-01A-11D-A36I-01	0.5916	-0.2421	0.0199
ESCA	TCGA-L5-A8NR-01A-11D-A37B-01	0.7584	-0.1976	0.1453
ESCA	TCGA-L5-A8NS-01A-12D-A37B-01	0.5728	-0.0356	-0.0356
ESCA	TCGA-L5-A8NT-01A-11D-A37B-01	0.6693	-0.3792	0.9709
ESCA	TCGA-L5-A8NV-01A-11D-A37B-01	0.6554	-0.4902	0.5305
ESCA	TCGA-L7-A56G-01A-21D-A25X-01	0.5399	-0.2493	0.5362
ESCA	TCGA-L7-A6VZ-01A-12D-A33D-01	0.7298	-0.1455	0.6407
ESCA	TCGA-LN-A49K-01A-11D-A246-01	0.6506	-0.0399	0.3962
ESCA	TCGA-LN-A49O-01A-11D-A246-01	0.7937	-0.4824	-0.4824
ESCA	TCGA-LN-A49V-01A-11D-A246-01	0.8639	-0.0181	-0.0181
ESCA	TCGA-LN-A4A1-01A-21D-A25X-01	0.6926	-0.0894	0.428
ESCA	TCGA-LN-A4A6-01A-11D-A25X-01	0.7631	-0.2216	0.8247
ESCA	TCGA-LN-A5U6-01A-11D-A28A-01	0.796	-0.2293	0.5039
ESCA	TCGA-LN-A5U7-01A-11D-A31T-01	0.742	-0.2735	0.2267
ESCA	TCGA-LN-A7HZ-01A-31D-A350-01	0.8286	-0.174	0.4331
ESCA	TCGA-LN-A8I1-01A-11D-A36I-01	0.7518	-0.3033	0.4804
ESCA	TCGA-LN-A9FO-01A-11D-A386-01	0.7642	-0.0444	0.5097
ESCA	TCGA-LN-A9FQ-01A-31D-A386-01	0.7218	-0.1984	0.5457
ESCA	TCGA-R6-A6DN-01B-11D-A31T-01	0.8295	-0.3819	-0.3819
ESCA	TCGA-R6-A6L4-01A-11D-A31T-01	0.727	-0.7429	0.6847
ESCA	TCGA-R6-A6L6-01B-11D-A33D-01	0.7058	-0.3468	0.4311
ESCA	TCGA-R6-A6Y2-01B-11D-A33D-01	0.9137	-0.1716	-0.1716
ESCA	TCGA-R6-A8W5-01B-11D-A37B-01	0.6381	-0.3238	0.7499
ESCA	TCGA-R6-A8W8-01B-11D-A37B-01	0.7085	-0.4494	0.3803
ESCA	TCGA-R6-A8WC-01A-11D-A37B-01	0.7419	-0.5957	0.5974
ESCA	TCGA-R6-A8WG-01A-11D-A37B-01	0.5376	-0.2055	0.6077
ESCA	TCGA-RE-A7BO-01A-11D-A33D-01	0.8585	-0.3827	0.497
ESCA	TCGA-S8-A6BW-01A-11D-A31T-01	0.5604	-0.2365	0.6495
ESCA	TCGA-V5-A7RC-01B-11D-A402-01	0.6194	-0.0203	0.2773
ESCA	TCGA-V5-AASW-01A-11D-A402-01	0.6147	-0.127	-0.127
ESCA	TCGA-VR-A8EP-01A-31D-A402-01	0.6828	-0.4464	0.6629
ESCA	TCGA-VR-AA4D-01A-11D-A37B-01	0.5986	-0.1566	0.4486
ESCA	TCGA-VR-AA7B-01A-31D-A402-01	0.7322	-0.3405	-0.3405
ESCA	TCGA-VR-AA7I-01A-11D-A402-01	0.7983	-0.3485	0.5306
ESCA	TCGA-XP-A8T6-01A-11D-A36I-01	0.6401	-0.4535	0.3852
ESCA	TCGA-XP-A8T8-01A-11D-A36I-01	0.8296	-0.1655	-0.1655
ESCA	TCGA-ZR-A9CJ-01B-11D-A386-01	0.7256	-0.0696	-0.0696
GBM	TCGA-02-0001-01C-01D-0182-01	0.7443	-0.5254	0.7277
GBM	TCGA-02-0051-01A-01G-0293-01	0.6562	-0.0207	-0.0207
GBM	TCGA-02-0069-01A-01D-0193-01	0.7947	-0.1349	0.457
GBM	TCGA-06-0176-01A-03D-0236-01	0.9265	-0.9999	0.8003
GBM	TCGA-06-0195-01B-01D-0236-01	0.6456	-0.5257	0.7612
GBM	TCGA-06-1086-01A-02D-0517-01	0.6979	-0.7873	0.8422
GBM	TCGA-06-1087-01A-02D-0517-01	0.6054	-0.2348	0.6691
GBM	TCGA-06-2557-01A-01D-0784-01	0.6542	-0.3883	0.8941
GBM	TCGA-06-5858-01A-01D-1694-01	0.9122	-1	0.5839
GBM	TCGA-06-6698-01A-11D-1842-01	0.9122	-0.4704	1
GBM	TCGA-12-1090-01A-01D-0517-01	0.9207	-0.9297	0.3856
GBM	TCGA-12-1099-01A-01D-0517-01	0.594	-0.1226	-0.1226
GBM	TCGA-12-1602-01A-01D-0591-01	0.6605	-0.2883	0.6438
GBM	TCGA-14-1454-01A-01D-0517-01	0.7993	-0.273	-0.273
GBM	TCGA-14-3477-01A-01D-0911-01	0.5842	-0.1959	0.3362
GBM	TCGA-15-1447-01A-01D-0517-01	0.5487	-0.5259	0.3992
GBM	TCGA-19-1787-01B-01D-0911-01	0.9537	-0.5098	0.6829
GBM	TCGA-19-4065-01A-01D-2002-01	0.5533	-0.4225	0.647
GBM	TCGA-19-A6J4-01A-11D-A33S-01	0.5328	-0.0413	0.5011
GBM	TCGA-28-1750-01A-01D-0591-01	0.8254	-0.1247	0.8844
GBM	TCGA-28-2506-01A-02D-0784-01	0.6034	-0.3749	1
GBM	TCGA-28-2509-01A-01D-0784-01	0.9153	-0.0422	0.414
GBM	TCGA-41-2573-01A-01D-0911-01	0.8546	-0.2656	0.4038
GBM	TCGA-41-3915-01A-01D-1224-01	0.6681	-0.416	0.7066
HNSC	TCGA-BA-5149-01A-01D-1510-01	0.843	-0.3566	-0.3566
HNSC	TCGA-BA-6871-01A-11D-1869-01	0.6035	-0.5351	0.4457
HNSC	TCGA-BA-6872-01A-11D-1869-01	0.6806	-0.373	0.3972
HNSC	TCGA-BB-4224-01A-01D-1432-01	0.8924	-0.2608	-0.2608
HNSC	TCGA-BB-4225-01A-01D-1432-01	0.6907	-0.536	0.7641
HNSC	TCGA-BB-8601-01A-11D-2390-01	0.7446	-0.4116	0.9867
HNSC	TCGA-BB-A5HY-01A-11D-A28Q-01	0.8393	-0.1304	0.0934
HNSC	TCGA-C9-A47Z-01A-11D-A24C-01	0.6715	-0.0172	0.6686
HNSC	TCGA-CN-4727-01A-01D-1432-01	0.654	-0.6142	0.7359
HNSC	TCGA-CN-4730-01A-01D-1432-01	0.8322	-0.4225	0.6632
HNSC	TCGA-CN-4737-01A-01D-1432-01	0.5932	-0.443	-0.443
HNSC	TCGA-CN-4740-01A-01D-1432-01	0.6716	-0.0959	0.444
HNSC	TCGA-CN-4742-01A-02D-1510-01	0.6921	-0.5456	0.985
HNSC	TCGA-CN-5356-01A-01D-1432-01	0.6675	-0.3771	0.6113
HNSC	TCGA-CN-6011-01A-11D-1682-01	0.9188	-0.2323	-0.2323
HNSC	TCGA-CN-6012-01A-11D-1682-01	0.7545	-0.2443	0.298
HNSC	TCGA-CN-6018-01A-11D-1682-01	0.7244	-0.0984	-0.079
HNSC	TCGA-CN-6022-01A-21D-1682-01	0.7525	-0.3759	0.4834
HNSC	TCGA-CN-6023-01A-11D-1682-01	0.8282	-0.046	0.5746
HNSC	TCGA-CN-6988-01A-11D-1910-01	0.7686	-0.3982	0.5371
HNSC	TCGA-CN-6989-01A-11D-1910-01	0.738	-0.0987	0.4743
HNSC	TCGA-CN-6998-01A-23D-2010-01	0.6565	-0.2168	0.8671
HNSC	TCGA-CN-A49A-01A-11D-A24C-01	0.6687	-0.3145	0.2395
HNSC	TCGA-CN-A63U-01A-11D-A30D-01	0.6819	-0.0196	0.419
HNSC	TCGA-CQ-6220-01A-11D-1910-01	0.759	-0.3529	-0.3529
HNSC	TCGA-CQ-7069-01A-11D-2390-01	0.5244	-0.3207	0.7754
HNSC	TCGA-CR-5247-01A-01D-2010-01	0.7175	-0.1228	0.6013
HNSC	TCGA-CR-6477-01A-11D-1869-01	0.6907	-0.3939	-0.3939
HNSC	TCGA-CR-6478-01A-11D-1869-01	0.7286	-0.3951	0.6932
HNSC	TCGA-CR-7365-01A-11D-2010-01	0.6687	-0.1985	0.9646
HNSC	TCGA-CR-7367-01A-11D-2010-01	0.7808	-0.3484	-0.3484
HNSC	TCGA-CR-7370-01A-11D-2128-01	0.773	-0.1361	0.7405
HNSC	TCGA-CR-7372-01A-11D-2010-01	0.6538	-0.2952	-0.2952
HNSC	TCGA-CR-7379-01A-11D-2010-01	0.619	-0.002	0.1675
HNSC	TCGA-CR-7380-01A-11D-2010-01	0.6867	-0.3386	0.5527
HNSC	TCGA-CR-7383-01A-11D-2128-01	0.6829	-0.1251	-0.0905
HNSC	TCGA-CR-7390-01A-11D-2010-01	0.7156	-0.422	0.3598
HNSC	TCGA-CR-7397-01A-11D-2010-01	0.6825	-0.1732	-0.1732
HNSC	TCGA-CV-5430-01A-02D-1682-01	0.7366	-0.419	0.5396
HNSC	TCGA-CV-5431-01A-01D-1510-01	0.7804	-0.1133	-0.1133
HNSC	TCGA-CV-5432-01A-02D-1682-01	0.8827	-0.2077	-0.2077
HNSC	TCGA-CV-5434-01A-01D-1682-01	0.8156	-0.2598	0.5797
HNSC	TCGA-CV-5440-01A-01D-1510-01	0.7844	-0.0256	0.6114
HNSC	TCGA-CV-5973-01A-11D-1682-01	0.7579	-0.152	-0.152
HNSC	TCGA-CV-5977-01A-11D-1682-01	0.7423	-0.2727	0.7039
HNSC	TCGA-CV-6003-01A-11D-1682-01	0.7946	-0.1795	0.7123
HNSC	TCGA-CV-6941-01A-11D-1910-01	0.7872	-0.1524	-0.1524
HNSC	TCGA-CV-6945-01A-11D-1910-01	0.6305	-0.4421	0.7267
HNSC	TCGA-CV-6951-01A-11D-1910-01	0.7537	-0.1377	0.1547
HNSC	TCGA-CV-6954-01A-11D-1910-01	0.816	-0.2744	-0.2744
HNSC	TCGA-CV-6962-01A-11D-1910-01	0.6635	-0.1645	0.5
HNSC	TCGA-CV-7091-01A-11D-2010-01	0.7626	-0.0532	-0.0532
HNSC	TCGA-CV-7102-01A-11D-2010-01	0.6473	-0.3609	0.5343
HNSC	TCGA-CV-7243-01A-11D-2010-01	0.7926	-0.0637	0.5473
HNSC	TCGA-CV-7245-01A-11D-2010-01	0.7873	-0.0968	-0.1729
HNSC	TCGA-CV-7248-01A-11D-2010-01	0.5604	-0.036	0.5814
HNSC	TCGA-CV-7255-01A-11D-2010-01	0.7215	-0.2552	0.4933
HNSC	TCGA-CV-7409-01A-31D-2228-01	0.7603	-0.3786	0.323
HNSC	TCGA-CV-7415-01A-11D-2077-01	0.7037	-0.0069	0.4003
HNSC	TCGA-CV-7424-01A-11D-2077-01	0.6821	-0.0041	0.175
HNSC	TCGA-CV-7440-01A-11D-2128-01	0.7557	-0.1767	0.3992
HNSC	TCGA-CV-A45X-01A-21D-A253-01	0.7258	-0.0833	0.2246
HNSC	TCGA-CX-7086-01A-11D-2077-01	0.7108	-0.1306	0.5602
HNSC	TCGA-CX-7219-01A-11D-2010-01	0.6055	-0.1086	0.6315
HNSC	TCGA-D6-6516-01A-11D-1869-01	0.5597	-0.5481	0.238
HNSC	TCGA-D6-6826-01A-11D-1910-01	0.6712	-0.7091	0.1818
HNSC	TCGA-D6-8569-01A-11D-2390-01	0.5916	-0.4419	0.7055
HNSC	TCGA-D6-A6EM-01A-21D-A31K-01	0.6353	-0.6218	0.547
HNSC	TCGA-D6-A6EP-01A-11D-A31K-01	0.8675	-0.1774	0.4436
HNSC	TCGA-DQ-5631-01A-01D-1869-01	0.7825	-0.0033	-0.0033
HNSC	TCGA-DQ-7588-01A-11D-2077-01	0.5928	-0.1746	0.6193
HNSC	TCGA-DQ-7592-01A-11D-2077-01	0.8054	-0.2339	-0.0228
HNSC	TCGA-F7-A50G-01A-11D-A25X-01	0.7344	-0.5396	0.5396
HNSC	TCGA-HD-7831-01A-11D-2128-01	0.6939	-0.17	0.5312
HNSC	TCGA-HD-A6HZ-01A-12D-A31K-01	0.6465	-0.0864	-0.0864
HNSC	TCGA-IQ-A61G-01A-11D-A30D-01	0.674	-0.4645	0.3983
HNSC	TCGA-IQ-A61K-01A-11D-A30D-01	0.7061	-0.6262	0.9248
HNSC	TCGA-IQ-A61O-01A-11D-A30D-01	0.8746	-0.1219	-0.1219
HNSC	TCGA-MT-A51W-01A-21D-A25X-01	0.7264	-0.3535	0.7487
HNSC	TCGA-MT-A51X-01A-11D-A25X-01	0.8296	-0.4022	-0.4022
HNSC	TCGA-MT-A7BN-01A-12D-A34I-01	0.7546	-0.0731	0.2884
HNSC	TCGA-P3-A5QA-01A-11D-A28Q-01	0.6591	-0.5644	-0.5644
HNSC	TCGA-P3-A6T4-01A-11D-A34I-01	0.6853	-0.2444	0.4998
HNSC	TCGA-QK-A6IG-01A-11D-A31K-01	0.6814	-0.3286	0.2344
HNSC	TCGA-QK-A6VB-01A-12D-A34I-01	0.626	-0.3963	0.9339
HNSC	TCGA-RS-A6TO-01A-32D-A34I-01	0.6476	-0.4347	0.5995
HNSC	TCGA-UF-A71A-01A-22D-A34I-01	0.7723	-0.4981	0.5634
HNSC	TCGA-UF-A71E-01A-31D-A34I-01	0.6429	-0.2634	0.3781
HNSC	TCGA-UF-A7JH-01A-21D-A34I-01	0.7473	-0.1656	-0.1656
KICH	TCGA-KL-8339-01A-11D-2308-01	0.5561	-0.0054	0.7708
KICH	TCGA-KL-8346-01A-11D-2308-01	0.5118	-0.3256	0.8528
KICH	TCGA-KN-8423-01A-11D-2308-01	0.5771	-1	0.9726
KICH	TCGA-KN-8425-01A-11D-2308-01	0.6659	-0.3532	0.8964
KICH	TCGA-KN-8426-01A-11D-2308-01	0.6657	-0.8721	0.8585
KICH	TCGA-KN-8427-01A-11D-2308-01	0.8092	-0.1434	0.7836
KICH	TCGA-KN-8428-01A-11D-2308-01	0.6236	-0.3284	0.693
KICH	TCGA-KN-8433-01A-11D-2308-01	0.6694	-0.7764	0.9483
KICH	TCGA-KO-8410-01A-11D-2308-01	0.5463	-1	1
KICH	TCGA-KO-8413-01A-11D-2308-01	0.6715	-0.821	0.9209
KICH	TCGA-KO-8414-01A-11D-2308-01	0.51	-0.1697	0.9479
KIRC	TCGA-AK-3436-01A-02D-1322-01	0.5983	-0.1303	0.6151
KIRC	TCGA-B0-4688-01A-01D-1274-01	0.7996	-0.2509	-0.2509
KIRC	TCGA-B0-4698-01A-01D-1499-01	0.7124	-0.6812	0.3859
KIRC	TCGA-B0-4710-01A-01D-1499-01	0.5919	-0.4222	0.8167
KIRC	TCGA-B0-4712-01A-01D-1499-01	0.5509	-0.5571	-0.5571
KIRC	TCGA-B0-4844-01A-01D-1274-01	0.6794	-0.646	-0.646
KIRC	TCGA-B0-5102-01A-01D-1417-01	0.7441	-0.674	1
KIRC	TCGA-B0-5109-01A-02D-1417-01	0.7747	-0.4363	0.4338
KIRC	TCGA-B0-5116-01A-02D-1417-01	0.7382	-0.7551	-0.7551
KIRC	TCGA-BP-4176-01A-02D-1283-01	0.6176	-0.5092	0.4461
KIRC	TCGA-BP-4343-01A-02D-1283-01	0.7114	-0.6374	0.666
KIRC	TCGA-BP-4351-01A-01D-1283-01	0.614	-0.2412	1
KIRC	TCGA-BP-4352-01A-01D-1283-01	0.8072	-0.1918	0.6057
KIRC	TCGA-BP-4775-01A-01D-1283-01	0.5238	-1	0.5885
KIRC	TCGA-BP-4977-01A-01D-1331-01	0.7918	-0.7703	0.8183
KIRC	TCGA-BP-4985-01A-01D-1331-01	0.7147	-0.0303	0.6214
KIRC	TCGA-BP-5173-01A-01D-1423-01	0.5966	-0.2337	0.7356
KIRC	TCGA-BP-5175-01A-01D-1423-01	0.5967	-0.2383	0.5083
KIRC	TCGA-BP-5178-01A-01D-1423-01	0.6634	-0.4397	0.4912
KIRC	TCGA-BP-5191-01A-01D-1423-01	0.6812	-0.4585	-0.4585
KIRC	TCGA-BP-5198-01A-01D-1423-01	0.6778	-0.3617	0.5923
KIRC	TCGA-CJ-4635-01A-02D-1302-01	0.6108	-0.432	-0.432
KIRC	TCGA-CJ-4644-01A-02D-1322-01	0.8452	-0.2767	0.8198
KIRC	TCGA-CJ-4873-01A-01D-1302-01	0.7383	-0.5893	0.6947
KIRC	TCGA-CJ-4901-01A-01D-1423-01	0.651	-0.0718	-0.0703
KIRC	TCGA-CJ-4903-01A-01D-1423-01	0.508	-0.6763	0.4406
KIRC	TCGA-CJ-5671-01A-11D-1530-01	0.5196	-0.4152	0.4682
KIRC	TCGA-CJ-5679-01A-11D-1530-01	0.7401	-0.1826	0.7208
KIRC	TCGA-CZ-4858-01A-01D-1302-01	0.7286	-0.315	0.7769
KIRC	TCGA-CZ-5984-01A-11D-1668-01	0.5528	-0.3887	-0.3887
KIRP	TCGA-2Z-A9JG-01A-11D-A42I-01	0.5542	-0.8478	1
KIRP	TCGA-4A-A93X-01A-11D-A36W-01	0.5193	-0.5285	0.3653
KIRP	TCGA-A4-7286-01A-11D-2135-01	0.6784	-0.6552	0.2667
KIRP	TCGA-A4-A5Y1-01A-11D-A28F-01	0.6335	-0.6012	0.4873
KIRP	TCGA-AL-A5DJ-01A-11D-A26O-01	0.6666	-0.3114	-0.3114
KIRP	TCGA-BQ-5891-01A-11D-1588-01	0.7672	-0.789	0.8223
KIRP	TCGA-BQ-5892-01A-11D-1588-01	0.5589	-0.3697	0.8275
KIRP	TCGA-BQ-5894-01A-11D-1588-01	0.83	-0.3679	1
KIRP	TCGA-G7-7502-01A-11D-2200-01	0.6195	-0.7642	1
KIRP	TCGA-GL-7966-01A-11D-2200-01	0.6185	-0.2301	0.6634
KIRP	TCGA-IA-A40Y-01A-11D-A253-01	0.6702	-0.2723	0.7287
KIRP	TCGA-P4-A5EB-01A-11D-A28F-01	0.6538	-0.911	0.8653
LGG	TCGA-CS-6665-01A-11D-1892-01	0.5399	-0.5813	0.885
LGG	TCGA-DU-6400-01A-12D-1704-01	0.5263	-0.1745	0.638
LGG	TCGA-DU-8158-01A-11D-2252-01	0.7372	-0.4165	0.8123
LGG	TCGA-E1-A7YD-01A-11D-A349-01	0.5529	-0.5197	0.3687
LGG	TCGA-FG-7634-01A-11D-2085-01	0.6992	-0.6361	0.8275
LGG	TCGA-VM-A8CA-01A-11D-A36N-01	0.6319	-0.8475	1
LIHC	TCGA-2Y-A9GY-01A-11D-A381-01	0.6307	-0.1784	0.6805
LIHC	TCGA-2Y-A9GZ-01A-11D-A38W-01	0.5791	-0.7738	0.856
LIHC	TCGA-BC-A10R-01A-11D-A12Y-01	0.5898	-0.1974	0.4099
LIHC	TCGA-BD-A3EP-01A-11D-A22E-01	0.5359	-0.0616	0.4397
LIHC	TCGA-BW-A5NO-01A-11D-A27H-01	0.5336	-0.1651	-0.2594
LIHC	TCGA-CC-5261-01A-01D-A12Y-01	0.8279	-0.4216	-0.4216
LIHC	TCGA-CC-A3MB-01A-11D-A20V-01	0.7434	-0.3289	0.2901
LIHC	TCGA-CC-A5UD-01A-11D-A28W-01	0.7513	-0.6103	0.6393
LIHC	TCGA-CC-A7IE-01A-21D-A381-01	0.5851	-0.5303	0.7071
LIHC	TCGA-CC-A7II-01A-11D-A33B-01	0.563	-0.2016	0.599
LIHC	TCGA-CC-A7IJ-01A-11D-A33P-01	0.772	-0.0786	0.7578
LIHC	TCGA-CC-A7IL-01A-11D-A33P-01	0.5698	-0.5728	0.6422
LIHC	TCGA-CC-A9FW-01A-11D-A36W-01	0.6312	-0.611	0.6932
LIHC	TCGA-DD-A118-01A-11D-A12Y-01	0.7582	-0.0769	-0.0769
LIHC	TCGA-DD-A1E9-01A-21D-A151-01	0.6917	-0.5126	0.8486
LIHC	TCGA-DD-A1EJ-01A-11D-A151-01	0.6699	-0.0539	0.3306
LIHC	TCGA-DD-A4NO-01A-11D-A28W-01	0.5329	-0.7061	0.7827
LIHC	TCGA-DD-A73G-01A-22D-A32F-01	0.6156	-0.0249	0.5981
LIHC	TCGA-DD-AACB-01A-11D-A40Q-01	0.716	-0.3231	0.6092
LIHC	TCGA-DD-AACE-01A-11D-A40Q-01	0.5657	-0.7644	0.8316
LIHC	TCGA-DD-AACI-01A-11D-A40Q-01	0.5666	-0.5404	0.4308
LIHC	TCGA-DD-AACP-01A-11D-A40Q-01	0.7141	-0.485	0.3112
LIHC	TCGA-DD-AADF-01A-11D-A40Q-01	0.8419	-0.1387	-0.1387
LIHC	TCGA-DD-AADN-01A-11D-A40Q-01	0.6645	-0.0663	0.3438
LIHC	TCGA-DD-AAE0-01A-11D-A40Q-01	0.7281	-0.2398	0.1841
LIHC	TCGA-DD-AAEK-01A-11D-A40Q-01	0.6141	-0.2139	0.4468
LIHC	TCGA-ED-A82E-01A-11D-A34Y-01	0.5299	-0.3039	0.7747
LIHC	TCGA-FV-A3I0-01A-11D-A22E-01	0.8849	-0.0913	-0.0913
LIHC	TCGA-G3-A25T-01A-11D-A16U-01	0.5964	-0.7749	0.77
LIHC	TCGA-G3-A5SM-01A-12D-A28W-01	0.6322	-0.0657	-0.0657
LIHC	TCGA-G3-A7M9-01A-23D-A34Y-01	0.6314	-0.1758	0.3498
LIHC	TCGA-KR-A7K7-01A-11D-A33B-01	0.5511	-0.6996	0.788
LIHC	TCGA-NI-A8LF-01A-11D-A35Y-01	0.6074	-0.2656	0.4745
LIHC	TCGA-RC-A6M3-01A-11D-A32F-01	0.6324	-0.1946	0.7327
LIHC	TCGA-RG-A7D4-01A-12D-A33P-01	0.6962	-0.2317	0.0336
LIHC	TCGA-UB-A7MC-01A-11D-A33P-01	0.7222	-0.6548	-0.6548
LIHC	TCGA-UB-AA0U-01A-11D-A381-01	0.7398	-0.3406	-0.3406
LIHC	TCGA-WQ-A9G7-01A-11D-A36W-01	0.737	-0.5028	0.5632
LIHC	TCGA-XR-A8TF-01A-11D-A35Y-01	0.6495	-0.2005	0.606
LUAD	TCGA-05-4250-01A-01D-1877-01	0.8093	-0.3507	-0.3507
LUAD	TCGA-05-4389-01A-01D-1204-01	0.5823	-0.168	0.3906
LUAD	TCGA-05-4390-01A-02D-1752-01	0.6937	-0.0054	0.539
LUAD	TCGA-05-4398-01A-01D-1204-01	0.6096	-0.022	-0.022
LUAD	TCGA-05-4420-01A-01D-1204-01	0.7061	-0.1981	0.3077
LUAD	TCGA-05-4430-01A-02D-1204-01	0.663	-0.0189	0.1964
LUAD	TCGA-05-4432-01A-01D-1204-01	0.6149	-0.1232	-0.1232
LUAD	TCGA-35-5375-01A-01D-1624-01	0.6859	-0.1077	0.3246
LUAD	TCGA-38-4629-01A-02D-1204-01	0.6954	-0.5055	0.5489
LUAD	TCGA-44-6779-01A-11D-1854-01	0.6474	-0.4745	0.7114
LUAD	TCGA-44-7662-01A-11D-2062-01	0.6996	-0.3116	0.4912
LUAD	TCGA-44-7667-01A-31D-2062-01	0.8152	-0.1956	-0.1956
LUAD	TCGA-44-7669-01A-21D-2062-01	0.6245	-0.0108	0.4672
LUAD	TCGA-44-A47A-01A-21D-A24C-01	0.6087	-0.6495	0.7351
LUAD	TCGA-44-A47B-01A-11D-A24C-01	0.6536	-0.5408	0.5467
LUAD	TCGA-44-A4SU-01A-11D-A24O-01	0.7425	-0.0854	-0.0854
LUAD	TCGA-49-4505-01A-01D-1204-01	0.6281	-0.6723	0.4734
LUAD	TCGA-49-4506-01A-01D-1204-01	0.7782	-0.0873	-0.0873
LUAD	TCGA-49-4507-01A-01D-1204-01	0.701	-0.1978	-0.1978
LUAD	TCGA-49-6743-01A-11D-1854-01	0.713	-0.2265	0.5071
LUAD	TCGA-49-6767-01A-11D-1854-01	0.6966	-0.2988	0.5014
LUAD	TCGA-49-AAR0-01A-21D-A396-01	0.6864	-0.0026	0.4514
LUAD	TCGA-49-AARE-01A-11D-A40Z-01	0.6495	-0.2001	-0.2001
LUAD	TCGA-49-AARQ-01A-11D-A40Z-01	0.7649	-0.3507	-0.3507
LUAD	TCGA-4B-A93V-01A-11D-A396-01	0.6172	-0.104	-0.1043
LUAD	TCGA-50-5068-01A-01D-1624-01	0.6523	-0.0846	0.1673
LUAD	TCGA-50-5935-01A-11D-1752-01	0.7477	-0.3334	-0.3334
LUAD	TCGA-50-5944-01A-11D-1752-01	0.6446	-0.4303	0.651
LUAD	TCGA-50-6591-01A-11D-1752-01	0.8051	-0.0735	-0.0735
LUAD	TCGA-50-6593-01A-11D-1752-01	0.5883	-0.3366	0.2911
LUAD	TCGA-50-7109-01A-11D-2035-01	0.6368	-0.1405	0.4713
LUAD	TCGA-53-A4EZ-01A-12D-A24O-01	0.7299	-0.3119	0.649
LUAD	TCGA-55-1595-01A-01D-0944-01	0.7411	-0.0036	0.1377
LUAD	TCGA-55-5899-01A-11D-1624-01	0.7562	-0.0012	-0.0012
LUAD	TCGA-55-6642-01A-11D-1854-01	0.6213	-0.0082	0.1993
LUAD	TCGA-55-6712-01A-11D-1854-01	0.6986	-0.1822	0.1562
LUAD	TCGA-55-6970-01A-11D-1943-01	0.7572	-0.625	0.6108
LUAD	TCGA-55-7910-01A-11D-2166-01	0.6227	-0.1803	0.3813
LUAD	TCGA-55-7913-01B-11D-2237-01	0.6792	-0.5628	0.1767
LUAD	TCGA-55-8094-01A-11D-2237-01	0.6661	-0.3294	0.2569
LUAD	TCGA-55-8206-01A-11D-2237-01	0.6496	-0.3431	0.5791
LUAD	TCGA-55-8507-01A-11D-2389-01	0.659	-0.1504	-0.027
LUAD	TCGA-55-8508-01A-11D-2389-01	0.7171	-0.1895	-0.1895
LUAD	TCGA-55-8510-01A-11D-2389-01	0.6684	-0.044	0.538
LUAD	TCGA-55-A490-01A-11D-A24C-01	0.7999	-0.1604	-0.1604
LUAD	TCGA-55-A494-01A-11D-A24O-01	0.8415	-0.2635	0.2659
LUAD	TCGA-55-A57B-01A-12D-A396-01	0.5138	-0.6552	0.6213
LUAD	TCGA-62-8394-01A-11D-2322-01	0.577	-0.1637	-0.1637
LUAD	TCGA-62-8402-01A-11D-2322-01	0.7315	-0.2189	0.5367
LUAD	TCGA-62-A46O-01A-11D-A24C-01	0.7148	-0.2825	0.2335
LUAD	TCGA-62-A470-01A-11D-A24C-01	0.6494	-0.0641	0.6242
LUAD	TCGA-62-A471-01A-12D-A24C-01	0.712	-0.3818	0.4548
LUAD	TCGA-64-1678-01A-01D-0944-01	0.7183	-0.0391	0.1795
LUAD	TCGA-64-1680-01A-02D-0944-01	0.5058	-0.6901	0.7211
LUAD	TCGA-64-5774-01A-01D-1624-01	0.7112	-0.1244	-0.1244
LUAD	TCGA-64-5775-01A-01D-1624-01	0.7908	-0.0391	-0.0391
LUAD	TCGA-64-5779-01A-01D-1624-01	0.6825	-0.2176	-0.2176
LUAD	TCGA-67-3771-01A-01D-0944-01	0.695	-0.0999	-0.0999
LUAD	TCGA-69-7760-01A-11D-2166-01	0.8503	-0.1529	0.547
LUAD	TCGA-69-7763-01A-11D-2166-01	0.6517	-0.3078	-0.3078
LUAD	TCGA-69-7973-01A-11D-2183-01	0.5504	-0.3761	0.4109
LUAD	TCGA-69-7980-01A-11D-2183-01	0.8805	-0.2739	-0.2739
LUAD	TCGA-69-8253-01A-11D-2283-01	0.6308	-0.427	0.5578
LUAD	TCGA-73-4662-01A-01D-1204-01	0.7713	-0.2718	-0.2718
LUAD	TCGA-73-4666-01A-01D-1204-01	0.6759	-0.1065	-0.1065
LUAD	TCGA-73-4668-01A-01D-1204-01	0.7724	-0.3039	0.6951
LUAD	TCGA-73-4670-01A-01D-1204-01	0.665	-0.2599	0.6453
LUAD	TCGA-73-4676-01A-01D-1752-01	0.8047	-0.7734	0.6852
LUAD	TCGA-73-4677-01A-01D-1204-01	0.7843	-0.2716	0.9419
LUAD	TCGA-73-7499-01A-11D-2183-01	0.9113	-0.2069	-0.2069
LUAD	TCGA-73-A9RS-01A-11D-A40Z-01	0.6525	-0.2069	0.2021
LUAD	TCGA-75-6206-01A-11D-1752-01	0.7772	-0.5673	0.8978
LUAD	TCGA-75-6211-01A-11D-1752-01	0.7071	-0.0292	0.3379
LUAD	TCGA-75-6212-01A-11D-1752-01	0.717	-0.8048	0.8864
LUAD	TCGA-75-6214-01A-41D-1943-01	0.7787	-0.1679	-0.1679
LUAD	TCGA-78-7145-01A-11D-2035-01	0.6795	-0.2902	0.7301
LUAD	TCGA-78-7146-01A-11D-2035-01	0.6863	-0.2873	0.4955
LUAD	TCGA-78-7147-01A-11D-2035-01	0.6278	-0.6142	0.2275
LUAD	TCGA-78-7148-01A-11D-2035-01	0.6437	-0.2091	0.5322
LUAD	TCGA-78-7154-01A-11D-2035-01	0.8174	-0.3432	0.7887
LUAD	TCGA-78-7155-01A-11D-2035-01	0.8155	-0.0358	0.3591
LUAD	TCGA-78-7160-01A-11D-2035-01	0.7496	-0.1469	0.5451
LUAD	TCGA-78-7535-01A-11D-2062-01	0.7406	-0.1629	0.8462
LUAD	TCGA-78-7539-01A-11D-2062-01	0.7089	-0.0031	0.2754
LUAD	TCGA-78-8640-01A-11D-2389-01	0.6557	-0.2202	0.2678
LUAD	TCGA-78-8662-01A-11D-2389-01	0.7759	-0.0357	0.05
LUAD	TCGA-80-5608-01A-31D-1943-01	0.7011	-0.2019	0.2952
LUAD	TCGA-86-6562-01A-11D-1752-01	0.7629	-0.2493	0.2037
LUAD	TCGA-86-7953-01A-11D-2183-01	0.5812	-0.0142	0.652
LUAD	TCGA-86-7954-01A-11D-2183-01	0.8257	-0.3316	0.4014
LUAD	TCGA-86-8054-01A-11D-2237-01	0.7575	-0.098	-0.098
LUAD	TCGA-86-8279-01A-11D-2283-01	0.8294	-0.315	0.4261
LUAD	TCGA-86-8669-01A-11D-2389-01	0.6403	-0.1238	0.6055
LUAD	TCGA-86-8673-01A-11D-2389-01	0.6857	-0.1854	0.19
LUAD	TCGA-91-6829-01A-21D-1854-01	0.8427	-0.2011	-0.2011
LUAD	TCGA-91-6847-01A-11D-1943-01	0.8855	-0.1705	0.2432
LUAD	TCGA-91-7771-01A-11D-2166-01	0.6721	-0.1756	-0.1756
LUAD	TCGA-91-8499-01A-11D-2389-01	0.7962	-0.22	-0.22
LUAD	TCGA-93-A4JO-01A-21D-A24O-01	0.5518	-0.0556	0.2338
LUAD	TCGA-95-7944-01A-11D-2183-01	0.5313	-0.0028	0.6094
LUAD	TCGA-95-A4VP-01A-21D-A25M-01	0.6676	-0.2046	-0.2046
LUAD	TCGA-97-7547-01A-11D-2035-01	0.8282	-0.3439	0.6337
LUAD	TCGA-97-7553-01A-21D-2035-01	0.6121	-0.6113	0.4863
LUAD	TCGA-97-8176-01A-11D-2389-01	0.6234	-0.5855	1
LUAD	TCGA-97-8179-01A-11D-2283-01	0.8004	-0.7155	0.6712
LUAD	TCGA-97-8552-01A-11D-2389-01	0.5002	-0.0824	0.3066
LUAD	TCGA-97-A4M1-01A-11D-A24O-01	0.5195	-0.0931	-0.0931
LUAD	TCGA-99-8033-01A-11D-2237-01	0.5924	-0.385	0.8016
LUAD	TCGA-J2-8192-01A-11D-2237-01	0.7834	-0.1508	0.1156
LUAD	TCGA-J2-8194-01A-11D-2237-01	0.7126	-0.747	0.5146
LUAD	TCGA-L9-A443-01A-12D-A24C-01	0.704	-0.5526	0.7431
LUAD	TCGA-L9-A444-01A-21D-A24C-01	0.6609	-0.1805	0.2253
LUAD	TCGA-L9-A5IP-01A-21D-A396-01	0.8524	-0.494	0.0898
LUAD	TCGA-L9-A7SV-01A-11D-A396-01	0.7344	-0.2109	0.1869
LUAD	TCGA-MN-A4N5-01A-11D-A24O-01	0.7471	-0.2014	0.5793
LUAD	TCGA-MP-A4T7-01A-11D-A24O-01	0.7403	-0.2654	0.7081
LUAD	TCGA-MP-A4TD-01A-32D-A25M-01	0.5892	-0.0175	0.759
LUAD	TCGA-MP-A4TE-01A-22D-A25M-01	0.793	-0.2045	-0.2045
LUAD	TCGA-NJ-A55R-01A-11D-A25M-01	0.6326	-0.4375	0.6669
LUSC	TCGA-18-3410-01A-01D-1969-01	0.6376	-0.1248	0.5373
LUSC	TCGA-18-3412-01A-01D-0978-01	0.7339	-0.3758	-0.3758
LUSC	TCGA-18-3421-01A-01D-0978-01	0.8306	-0.1839	-0.1839
LUSC	TCGA-18-4083-01A-01D-1097-01	0.7862	-0.2954	0.374
LUSC	TCGA-21-1071-01A-01D-0685-01	0.5761	-0.0678	0.3806
LUSC	TCGA-21-1072-01A-01D-0685-01	0.7193	-0.1554	-0.1554
LUSC	TCGA-21-1075-01A-01D-0685-01	0.7976	-0.0453	0.8396
LUSC	TCGA-21-1079-01A-01D-0685-01	0.6755	-0.3477	-0.3477
LUSC	TCGA-21-1081-01A-01D-0685-01	0.7725	-0.5627	0.4472
LUSC	TCGA-21-5783-01A-41D-2183-01	0.8156	-0.3137	0.6847
LUSC	TCGA-21-5786-01A-01D-1631-01	0.8025	-0.1561	0.3244
LUSC	TCGA-22-1011-01A-01D-0685-01	0.5753	-0.01	0.6419
LUSC	TCGA-22-1017-01A-01D-0685-01	0.7256	-0.326	-0.326
LUSC	TCGA-22-4591-01A-01D-1195-01	0.8617	-0.3245	0.2361
LUSC	TCGA-22-4605-01A-21D-2121-01	0.6547	-0.3557	0.6453
LUSC	TCGA-22-5471-01A-01D-1631-01	0.6876	-0.328	0.2091
LUSC	TCGA-22-5473-01A-01D-1631-01	0.7711	-0.2597	0.5275
LUSC	TCGA-22-5483-01A-01D-1816-01	0.5533	-0.1942	0.3216
LUSC	TCGA-22-A5C4-01A-12D-A27J-01	0.7978	-0.047	0.1919
LUSC	TCGA-33-4538-01A-01D-1195-01	0.7478	-0.212	0.8304
LUSC	TCGA-33-4586-01A-01D-1439-01	0.8054	-0.1887	0.6792
LUSC	TCGA-33-6737-01A-11D-1816-01	0.7478	-0.0608	-0.0608
LUSC	TCGA-33-AASB-01A-11D-A400-01	0.8447	-0.13	-0.13
LUSC	TCGA-33-AASD-01A-11D-A400-01	0.6851	-0.1927	0.7543
LUSC	TCGA-33-AASJ-01A-11D-A400-01	0.8256	-0.2407	-0.2407
LUSC	TCGA-34-2609-01A-01D-0844-01	0.6953	-0.5	0.795
LUSC	TCGA-34-5231-01A-21D-1816-01	0.6319	-0.4317	0.388
LUSC	TCGA-34-5239-01A-21D-1816-01	0.8216	-0.3148	0.7797
LUSC	TCGA-34-5240-01A-01D-1439-01	0.9077	-0.327	0.659
LUSC	TCGA-34-5241-01A-01D-1439-01	0.7193	-0.1898	0.6821
LUSC	TCGA-34-5928-01A-11D-1816-01	0.9142	-0.0965	0.1572
LUSC	TCGA-34-7107-01A-11D-1943-01	0.7139	-0.2083	0.5993
LUSC	TCGA-34-8455-01A-11D-2322-01	0.5939	-0.5089	0.8916
LUSC	TCGA-37-3792-01A-01D-1969-01	0.716	-0.069	-0.069
LUSC	TCGA-37-5819-01A-01D-1631-01	0.8443	-0.1621	0.6105
LUSC	TCGA-37-A5EL-01A-11D-A26L-01	0.7242	-0.0343	0.4727
LUSC	TCGA-39-5016-01A-01D-1439-01	0.6327	-0.2701	-0.2701
LUSC	TCGA-39-5034-01A-01D-1439-01	0.8581	-0.127	-0.127
LUSC	TCGA-39-5035-01A-01D-1439-01	0.7672	-0.4294	0.8743
LUSC	TCGA-39-5040-01A-21D-2121-01	0.8697	-0.1447	0.3341
LUSC	TCGA-43-2578-01A-01D-1969-01	0.8368	-0.0477	-0.0477
LUSC	TCGA-43-3394-01A-01D-1549-01	0.7004	-0.1896	0.4548
LUSC	TCGA-43-3920-01A-01D-1549-01	0.7435	-0.1064	0.4713
LUSC	TCGA-43-5670-01A-21D-2121-01	0.7569	-0.3337	-0.3337
LUSC	TCGA-43-6143-01A-11D-1816-01	0.6846	-0.0921	0.2443
LUSC	TCGA-43-7657-01A-31D-2121-01	0.7907	-0.0414	-0.0414
LUSC	TCGA-43-7658-01A-11D-2121-01	0.7743	-0.3572	-0.3572
LUSC	TCGA-43-A475-01A-11D-A24C-01	0.8815	-0.3623	-0.3623
LUSC	TCGA-46-3769-01A-01D-0978-01	0.7655	-0.3054	0.2261
LUSC	TCGA-46-6025-01A-11D-1816-01	0.7892	-0.0486	-0.0486
LUSC	TCGA-52-7809-01A-21D-2121-01	0.7194	-0.1347	0.6385
LUSC	TCGA-52-7810-01A-11D-2121-01	0.6654	-0.1633	0.7101
LUSC	TCGA-56-1622-01A-01D-0685-01	0.6407	-0.1033	0.1532
LUSC	TCGA-56-7223-01A-11D-2041-01	0.7429	-0.3223	-0.3223
LUSC	TCGA-56-7582-01A-11D-2041-01	0.7671	-0.237	0.6253
LUSC	TCGA-56-7730-01A-11D-2121-01	0.8673	-0.0231	-0.0231
LUSC	TCGA-56-8304-01A-11D-2322-01	0.5842	-0.0205	0.3792
LUSC	TCGA-56-8308-01A-11D-2292-01	0.6548	-0.2094	0.3235
LUSC	TCGA-56-8504-01A-11D-2391-01	0.7988	-0.4347	0.5261
LUSC	TCGA-56-A4BX-01A-11D-A24C-01	0.7613	-0.2322	-0.2322
LUSC	TCGA-56-A5DR-01A-11D-A27J-01	0.6574	-0.6697	0.8484
LUSC	TCGA-58-8391-01A-11D-2322-01	0.7591	-0.1669	-0.1669
LUSC	TCGA-58-8393-01A-11D-2322-01	0.7951	-0.3659	-0.3659
LUSC	TCGA-58-A46K-01A-11D-A24C-01	0.6698	-0.0141	0.7269
LUSC	TCGA-58-A46M-01A-11D-A24C-01	0.9051	-0.17	-0.17
LUSC	TCGA-58-A46N-01A-11D-A24C-01	0.6249	-0.6045	0.5498
LUSC	TCGA-60-2706-01A-01D-0844-01	0.7628	-0.203	0.5182
LUSC	TCGA-60-2711-01A-01D-0844-01	0.6696	-0.1434	0.1186
LUSC	TCGA-60-2723-01A-01D-0844-01	0.8378	-0.0869	0.0131
LUSC	TCGA-63-A5M9-01A-11D-A26L-01	0.8481	-0.2174	0.2485
LUSC	TCGA-63-A5MI-01A-12D-A27J-01	0.7011	-0.0561	0.2475
LUSC	TCGA-63-A5ML-01A-31D-A27J-01	0.6616	-0.1971	-0.1971
LUSC	TCGA-63-A5MP-01A-11D-A26L-01	0.7165	-0.5958	-0.5958
LUSC	TCGA-63-A5MU-01A-11D-A26L-01	0.87	-0.2778	0.3752
LUSC	TCGA-63-A5MW-01A-11D-A26L-01	0.6986	-0.2655	-0.2655
LUSC	TCGA-66-2742-01A-01D-0978-01	0.7959	-0.3793	0.6316
LUSC	TCGA-66-2754-01A-01D-0978-01	0.8687	-0.0291	-0.0291
LUSC	TCGA-66-2759-01A-01D-1969-01	0.8017	-0.3916	0.6651
LUSC	TCGA-66-2763-01A-01D-0844-01	0.6838	-0.0514	0.2183
LUSC	TCGA-66-2770-01A-01D-0844-01	0.6643	-0.5611	0.8488
LUSC	TCGA-66-2773-01A-01D-1195-01	0.5769	-0.4714	0.1538
LUSC	TCGA-66-2785-01A-01D-0844-01	0.7817	-0.1279	-0.1279
LUSC	TCGA-66-2787-01A-01D-0978-01	0.7887	-0.0011	0.4467
LUSC	TCGA-66-2800-01A-01D-1195-01	0.7828	-0.1951	0.2847
LUSC	TCGA-68-A59J-01A-21D-A26L-01	0.7377	-0.4475	0.3143
LUSC	TCGA-6A-AB49-01A-12D-A400-01	0.7733	-0.3451	0.7058
LUSC	TCGA-77-6842-01A-11D-1943-01	0.7836	-0.2931	-0.2931
LUSC	TCGA-77-6845-01A-11D-1943-01	0.7499	-0.0666	0.5442
LUSC	TCGA-77-7142-01A-11D-2041-01	0.7147	-0.4642	0.6448
LUSC	TCGA-77-7463-01A-11D-2041-01	0.7667	-0.302	0.1256
LUSC	TCGA-77-7465-01A-11D-2041-01	0.6384	-0.23	0.7538
LUSC	TCGA-77-8009-01A-11D-2183-01	0.8986	-0.1387	0.364
LUSC	TCGA-77-8133-01A-12D-2243-01	0.6952	-0.0999	-0.0999
LUSC	TCGA-77-8136-01A-11D-2243-01	0.5492	-0.0245	0.6064
LUSC	TCGA-77-8143-01A-11D-2243-01	0.746	-0.3488	0.6167
LUSC	TCGA-77-A5G3-01A-31D-A27J-01	0.574	-0.0509	-0.0509
LUSC	TCGA-85-7843-01A-11D-2121-01	0.7195	-0.0234	0.2611
LUSC	TCGA-85-8052-01A-11D-2243-01	0.6382	-0.033	0.6878
LUSC	TCGA-85-8276-01A-11D-2292-01	0.7085	-0.4004	-0.4004
LUSC	TCGA-85-8354-01A-31D-2322-01	0.6676	-0.4255	0.091
LUSC	TCGA-85-8664-01A-11D-2391-01	0.7153	-0.3368	0.5701
LUSC	TCGA-85-A4JB-01A-51D-A25M-01	0.7288	-0.2031	0.6222
LUSC	TCGA-85-A4QR-01A-11D-A256-01	0.6428	-0.1852	0.3401
LUSC	TCGA-85-A50M-01A-21D-A25M-01	0.6053	-0.0514	0.0088
LUSC	TCGA-85-A5B5-01A-21D-A26L-01	0.6198	-0.074	-0.074
LUSC	TCGA-90-7767-01A-11D-2121-01	0.8172	-0.1756	-0.1756
LUSC	TCGA-92-8064-01A-11D-2243-01	0.831	-0.0792	0.5968
LUSC	TCGA-94-7943-01A-11D-2183-01	0.5991	-0.2061	0.5396
LUSC	TCGA-94-A4VJ-01A-11D-A256-01	0.7945	-0.3639	-0.3639
LUSC	TCGA-98-8020-01A-11D-2243-01	0.7627	-0.2714	0.4707
LUSC	TCGA-98-A53B-01A-11D-A25M-01	0.7521	-0.2213	0.6268
LUSC	TCGA-NC-A5HG-01A-11D-A26L-01	0.5973	-0.1481	0.582
LUSC	TCGA-NC-A5HH-01A-11D-A26L-01	0.9044	-0.0506	-0.0506
LUSC	TCGA-NC-A5HK-01A-11D-A26L-01	0.7883	-0.0786	0.5052
LUSC	TCGA-NC-A5HN-01A-11D-A26L-01	0.7062	-0.1079	-0.1079
LUSC	TCGA-NC-A5HQ-01A-11D-A26L-01	0.6246	-0.1746	0.2176
LUSC	TCGA-NK-A7XE-01A-12D-A400-01	0.712	-0.4488	0.5221
LUSC	TCGA-O2-A52N-01A-11D-A26L-01	0.7307	-0.272	-0.272
LUSC	TCGA-O2-A52W-01A-11D-A26L-01	0.6673	-0.2687	0.7826
LUSC	TCGA-XC-AA0X-01A-32D-A400-01	0.5235	-0.1547	-0.1547
MESO	TCGA-LK-A4O0-01A-11D-A34B-01	0.5161	-0.1031	0.8057
MESO	TCGA-MQ-A6BR-01A-11D-A34B-01	0.9316	-0.3372	1
MESO	TCGA-MQ-A6BS-01A-12D-A34B-01	0.5754	-0.2532	0.6608
MESO	TCGA-NQ-A57I-01A-11D-A34B-01	0.8045	-0.177	0.642
MESO	TCGA-NQ-A638-01A-11D-A34B-01	0.7087	-0.4834	-0.4834
MESO	TCGA-SC-A6LP-01A-11D-A34B-01	0.8714	-0.5166	0.7002
MESO	TCGA-SC-AA5Z-01A-21D-A39Q-01	0.6119	-1	0.5447
MESO	TCGA-SH-A7BH-01A-11D-A34B-01	0.5616	-0.1862	1
MESO	TCGA-TS-A8AF-01A-11D-A39Q-01	0.7156	-0.1545	0.4441
MESO	TCGA-UD-AAC1-01A-11D-A39Q-01	0.8755	-1	1
MESO	TCGA-UT-A88G-01B-11D-A39Q-01	0.7171	-0.3211	0.9518
OV	TCGA-04-1337-01A-01D-0428-01	0.7783	-0.4923	0.7909
OV	TCGA-04-1338-01A-01D-0428-01	0.6875	-0.134	0.3496
OV	TCGA-04-1343-01A-01D-0428-01	0.634	-0.1983	0.1105
OV	TCGA-04-1346-01A-01D-0428-01	0.7192	-0.4032	-0.4032
OV	TCGA-04-1349-01A-01D-0452-01	0.614	-0.3587	0.6721
OV	TCGA-04-1350-01A-01D-0452-01	0.6864	-0.2908	0.4762
OV	TCGA-04-1356-01A-01D-0452-01	0.73	-0.2985	0.7027
OV	TCGA-04-1357-01A-01D-0452-01	0.7704	-0.1077	-0.1077
OV	TCGA-04-1360-01A-01D-0452-01	0.7378	-0.0185	0.1585
OV	TCGA-04-1362-01A-01D-0452-01	0.7258	-0.1147	0.3886
OV	TCGA-04-1364-01A-01D-0452-01	0.7817	-0.0862	-0.0862
OV	TCGA-04-1514-01A-01D-0497-01	0.8081	-0.1512	-0.1512
OV	TCGA-04-1517-01A-01D-0533-01	0.7389	-0.0075	0.0828
OV	TCGA-04-1525-01A-01D-0533-01	0.689	-0.2121	0.289
OV	TCGA-04-1530-01A-02D-0497-01	0.6432	-0.0613	0.4515
OV	TCGA-04-1542-01A-01D-0497-01	0.6209	-0.2618	0.3755
OV	TCGA-04-1646-01A-01D-0577-01	0.5818	-0.1331	0.871
OV	TCGA-04-1649-01A-01D-0577-01	0.6264	-0.383	-0.383
OV	TCGA-09-1659-01B-01D-0533-01	0.7162	-0.1509	0.5164
OV	TCGA-09-1668-01B-01D-0533-01	0.6456	-0.2255	0.5119
OV	TCGA-09-1670-01A-01D-0559-01	0.5778	-0.1137	0.5778
OV	TCGA-09-1672-01A-01D-0559-01	0.5784	-0.2645	0.1494
OV	TCGA-09-1674-01A-01D-0559-01	0.675	-0.2959	0.3742
OV	TCGA-09-2054-01A-01D-0663-01	0.7296	-0.0855	0.1989
OV	TCGA-10-0935-01A-03D-0399-01	0.5917	-0.1827	0.4109
OV	TCGA-10-0936-01A-01D-0399-01	0.7358	-0.128	0.3598
OV	TCGA-13-0723-01A-02D-0356-01	0.6484	-0.5301	0.6259
OV	TCGA-13-0724-01A-01D-0356-01	0.6245	-0.2361	0.3726
OV	TCGA-13-0727-01A-01D-0356-01	0.8194	-0.3594	0.7063
OV	TCGA-13-0760-01A-01D-0356-01	0.7706	-0.1192	-0.1192
OV	TCGA-13-0762-01A-01D-0356-01	0.7598	-0.2525	0.2377
OV	TCGA-13-0803-01A-01D-0356-01	0.7081	-0.052	-0.052
OV	TCGA-13-0807-01B-02D-0399-01	0.823	-0.1795	-0.1795
OV	TCGA-13-0883-01A-02D-0399-01	0.6931	-0.0105	-0.0105
OV	TCGA-13-0888-01A-01D-0399-01	0.9054	-0.0829	-0.0829
OV	TCGA-13-0890-01A-01D-0399-01	0.6515	-0.0489	0.4848
OV	TCGA-13-0893-01B-01D-0452-01	0.826	-0.0228	-0.0228
OV	TCGA-13-0911-01A-01D-0399-01	0.813	-0.2752	0.6786
OV	TCGA-13-0921-01A-01D-0399-01	0.6263	-0.0617	0.3681
OV	TCGA-13-1407-01A-01D-0452-01	0.6865	-0.2133	-0.2133
OV	TCGA-13-1410-01A-01D-0452-01	0.8143	-0.1394	0.5297
OV	TCGA-13-1411-01A-01D-0452-01	0.7131	-0.0448	0.074
OV	TCGA-13-1487-01A-01D-0472-01	0.678	-0.4824	0.4223
OV	TCGA-13-1496-01A-01D-0472-01	0.634	-0.5495	0.681
OV	TCGA-13-1499-01A-01D-0472-01	0.6175	-0.0146	-0.2561
OV	TCGA-13-1506-01A-01D-0472-01	0.7	-0.4658	0.3525
OV	TCGA-13-1507-01A-01D-0472-01	0.818	-0.3684	0.0967
OV	TCGA-13-2057-01A-02D-1043-01	0.8439	-0.0388	0.2471
OV	TCGA-13-2060-01A-01D-0704-01	0.6536	-0.116	0.3242
OV	TCGA-13-A5FU-01A-11D-A402-01	0.6413	-0.4034	0.7189
OV	TCGA-20-0990-01A-01D-0428-01	0.7116	-0.05	0.223
OV	TCGA-20-1683-01A-01D-0559-01	0.8231	-0.1641	-0.1641
OV	TCGA-20-1684-01A-01D-0559-01	0.6848	-0.3096	0.182
OV	TCGA-20-1686-01A-01D-0559-01	0.6734	-0.4535	0.1878
OV	TCGA-23-1021-01B-01D-0428-01	0.65	-0.1623	0.685
OV	TCGA-23-1022-01A-02D-0428-01	0.7194	-0.2694	0.426
OV	TCGA-23-1024-01A-02D-0428-01	0.6411	-0.0659	-0.0659
OV	TCGA-23-1030-01A-02D-0428-01	0.6968	-0.3853	0.3184
OV	TCGA-23-1109-01A-01D-0428-01	0.6228	-0.4942	-0.4942
OV	TCGA-23-1110-01A-01D-0428-01	0.7627	-0.1648	0.1206
OV	TCGA-23-1116-01A-01D-0428-01	0.5846	-0.4608	-0.4608
OV	TCGA-23-1809-01A-01D-0559-01	0.8566	-0.2679	0.2037
OV	TCGA-23-2077-01A-01D-0663-01	0.6868	-0.089	0.4205
OV	TCGA-24-0979-01A-01D-0428-01	0.6659	-0.0735	-0.0735
OV	TCGA-24-0982-01A-01D-0428-01	0.692	-0.1755	-0.1755
OV	TCGA-24-1422-01A-01D-0472-01	0.7008	-0.3006	-0.3006
OV	TCGA-24-1427-01A-01D-0472-01	0.777	-0.0489	-0.0489
OV	TCGA-24-1431-01A-01D-0472-01	0.7551	-0.2269	0.5478
OV	TCGA-24-1434-01A-01D-0472-01	0.7161	-0.0434	-0.0434
OV	TCGA-24-1466-01A-01D-0472-01	0.697	-0.3784	0.4752
OV	TCGA-24-1474-01A-01D-0497-01	0.8496	-0.2176	-0.2176
OV	TCGA-24-1544-01A-01D-0533-01	0.5628	-0.1051	-0.1051
OV	TCGA-24-1545-01A-01D-0533-01	0.8308	-0.0583	-0.0583
OV	TCGA-24-1552-01A-01D-0497-01	0.6525	-0.2458	0.2562
OV	TCGA-24-1557-01A-01D-0533-01	0.7111	-0.2974	-0.2974
OV	TCGA-24-1558-01A-01D-0533-01	0.5158	-0.2047	0.284
OV	TCGA-24-1604-01A-01D-0497-01	0.7644	-0.0417	0.1849
OV	TCGA-24-1614-01A-01D-0497-01	0.6483	-0.273	0.521
OV	TCGA-24-1616-01A-01D-0497-01	0.6455	-0.353	0.6078
OV	TCGA-24-1843-01A-01D-0577-01	0.7224	-0.2904	0.3935
OV	TCGA-24-1844-01A-01D-0577-01	0.5802	-0.0218	0.3763
OV	TCGA-24-1847-01A-01D-0559-01	0.8151	-0.052	-0.052
OV	TCGA-24-1920-01A-01D-0648-01	0.8229	-0.0745	0.3491
OV	TCGA-24-1930-01A-01D-0648-01	0.6735	-0.3393	-0.3393
OV	TCGA-24-2019-01A-02D-0663-01	0.6961	-0.002	-0.002
OV	TCGA-24-2020-01A-01D-0648-01	0.9127	-0.0959	-0.0959
OV	TCGA-24-2026-01A-01D-0648-01	0.7724	-0.2606	0.2514
OV	TCGA-24-2033-01A-01D-0663-01	0.7277	-0.195	0.587
OV	TCGA-24-2261-01A-01D-0663-01	0.8058	-0.0862	0.1095
OV	TCGA-24-2267-01A-01D-0704-01	0.6108	-0.2688	0.2474
OV	TCGA-24-2281-01A-01D-0704-01	0.737	-0.1573	0.3944
OV	TCGA-24-2293-01A-01D-0704-01	0.8188	-0.1098	-0.1098
OV	TCGA-24-2295-01A-01D-0704-01	0.8396	-0.0538	0.2484
OV	TCGA-25-1314-01A-01D-0452-01	0.723	-0.1824	-0.1824
OV	TCGA-25-1316-01A-01D-0452-01	0.6324	-0.859	0.9363
OV	TCGA-25-1318-01A-01D-0452-01	0.7689	-0.27	-0.27
OV	TCGA-25-1319-01A-01D-0452-01	0.6221	-0.5537	0.5427
OV	TCGA-25-1321-01A-01D-0452-01	0.8588	-0.098	0.1696
OV	TCGA-25-1329-01A-01D-0452-01	0.5249	-0.315	0.3583
OV	TCGA-25-1626-01A-01D-0533-01	0.7678	-0.2497	0.3815
OV	TCGA-25-1628-01A-01D-0533-01	0.6254	-0.3847	-0.3847
OV	TCGA-25-1633-01A-01D-0533-01	0.7777	-0.3701	-0.3701
OV	TCGA-25-1870-01A-01D-0648-01	0.8157	-0.211	-0.211
OV	TCGA-25-1871-01A-01D-0648-01	0.8558	-0.2147	-0.2147
OV	TCGA-25-1878-01A-01D-0648-01	0.8321	-0.3864	0.3669
OV	TCGA-25-2392-01A-01D-0704-01	0.699	-0.0236	-0.0236
OV	TCGA-25-2393-01A-01D-0704-01	0.7451	-0.1612	0.4519
OV	TCGA-25-2396-01A-01D-0704-01	0.7655	-0.2369	0.6847
OV	TCGA-25-2400-01A-01D-0704-01	0.8086	-0.1105	0.0217
OV	TCGA-25-2404-01A-01D-0704-01	0.7046	-0.0088	-0.0088
OV	TCGA-29-1691-01A-01D-0559-01	0.709	-0.0702	-0.0702
OV	TCGA-29-1699-01A-01D-0559-01	0.9121	-0.3098	0.3904
OV	TCGA-29-1703-01A-01D-0559-01	0.7202	-0.2649	0.343
OV	TCGA-29-1763-01A-02D-0559-01	0.7328	-0.0208	0.1918
OV	TCGA-29-1770-01A-01D-0559-01	0.6677	-0.1078	0.2132
OV	TCGA-29-1775-01A-01D-0577-01	0.6415	-0.0681	0.0334
OV	TCGA-29-2425-01A-01D-0704-01	0.7504	-0.1594	0.203
OV	TCGA-29-2432-01A-01D-1043-01	0.7428	-0.0627	0.1374
OV	TCGA-29-2434-01A-01D-1043-01	0.738	-0.3147	0.2433
OV	TCGA-29-A5NZ-01A-11D-A402-01	0.6948	-0.5137	0.7918
OV	TCGA-30-1853-01A-02D-0648-01	0.7336	-0.1239	0.5435
OV	TCGA-30-1855-01A-01D-0577-01	0.7228	-0.0003	0.431
OV	TCGA-30-1887-01A-01D-0648-01	0.8561	-0.293	0.2546
OV	TCGA-30-1892-01A-01D-0648-01	0.8151	-0.4227	0.5518
OV	TCGA-31-1950-01A-01D-0648-01	0.6742	-0.2162	0.1835
OV	TCGA-36-1569-01A-01D-0533-01	0.8078	-0.0009	-0.0284
OV	TCGA-36-1571-01A-01D-0533-01	0.6769	-0.4633	0.0955
OV	TCGA-36-1575-01A-01D-0533-01	0.8192	-0.0072	0.1002
OV	TCGA-36-1581-01A-01D-0533-01	0.7399	-0.2914	0.4174
OV	TCGA-36-2529-01A-01D-1043-01	0.6225	-0.2157	0.4376
OV	TCGA-36-2533-01A-01D-1043-01	0.61	-0.3642	0.3576
OV	TCGA-36-2547-01A-01D-1043-01	0.8246	-0.0742	-0.0742
OV	TCGA-36-2548-01A-01D-1043-01	0.701	-0.0291	0.4237
OV	TCGA-42-2593-01A-01D-1043-01	0.8057	-0.107	0.3384
OV	TCGA-57-1582-01A-01D-0533-01	0.844	-0.0261	-0.0261
OV	TCGA-57-1585-01A-01D-0533-01	0.6762	-0.2984	0.3684
OV	TCGA-57-1994-01A-01D-0648-01	0.8103	-0.0694	0.6989
OV	TCGA-59-2348-01A-01D-0704-01	0.7954	-0.128	0.5381
OV	TCGA-59-2351-01A-01D-0704-01	0.6388	-0.4486	0.5235
OV	TCGA-59-A5PD-01A-11D-A402-01	0.7647	-0.0269	-0.2241
OV	TCGA-5X-AA5U-01A-11D-A402-01	0.8735	-0.2897	0.4059
OV	TCGA-61-1741-01A-02D-0577-01	0.6935	-0.1879	0.6889
OV	TCGA-61-1899-01A-01D-0577-01	0.8787	-0.1203	0.4961
OV	TCGA-61-1907-01A-01D-0577-01	0.7933	-0.1963	0.3894
OV	TCGA-61-1915-01A-01D-0577-01	0.7665	-0.2036	0.3427
OV	TCGA-61-1919-01A-01D-0648-01	0.6498	-0.3656	-0.0242
OV	TCGA-61-2003-01A-01D-0663-01	0.7948	-0.0983	0.1015
OV	TCGA-61-2012-01A-01D-0663-01	0.7283	-0.2125	0.2217
OV	TCGA-61-2088-01A-01D-0663-01	0.5888	-0.4283	0.5843
OV	TCGA-61-2097-01A-02D-0663-01	0.6488	-0.1296	0.5894
OV	TCGA-61-2098-01A-01D-0663-01	0.7804	-0.3272	-0.3272
OV	TCGA-61-2101-01A-01D-0663-01	0.7498	-0.1261	-0.1261
OV	TCGA-61-2104-01A-01D-0663-01	0.8087	-0.3686	-0.3686
OV	TCGA-61-2113-01A-01D-0663-01	0.66	-0.0915	-0.0915
OV	TCGA-61-2614-01A-01D-1134-01	0.823	-0.0477	-0.0477
OV	TCGA-OY-A56P-01A-12D-A402-01	0.8665	-0.146	0.7076
OV	TCGA-OY-A56Q-01A-11D-A402-01	0.8042	-0.1254	-0.1254
PAAD	TCGA-2J-AABP-01A-11D-A40V-01	0.8655	-0.274	-0.274
PAAD	TCGA-2L-AAQM-01A-11D-A396-01	0.5433	-0.5221	1
PAAD	TCGA-3A-A9IL-01A-11D-A38F-01	0.6006	-0.5206	0.7476
PAAD	TCGA-3A-A9IN-01A-11D-A396-01	0.5888	-1	1
PAAD	TCGA-3A-A9IS-01A-21D-A396-01	0.571	-0.5473	-0.5473
PAAD	TCGA-3A-A9IV-01A-11D-A40V-01	0.6426	-0.8355	0.7666
PAAD	TCGA-FB-A545-01A-11D-A26H-01	0.6317	-0.4842	0.9542
PAAD	TCGA-FB-AAPZ-01A-11D-A40V-01	0.7087	-0.1382	0.3498
PAAD	TCGA-FB-AAQ1-01A-12D-A40V-01	0.5626	-0.1216	0.6795
PAAD	TCGA-HZ-7922-01A-11D-2153-01	0.7352	-0.6052	1
PAAD	TCGA-HZ-7926-01A-11D-2153-01	0.5639	-0.1758	-0.1758
PAAD	TCGA-HZ-A9TJ-01A-11D-A40V-01	0.6989	-0.3611	0.4094
PAAD	TCGA-IB-7646-01A-11D-2153-01	0.5613	-0.6574	0.6328
PAAD	TCGA-IB-7886-01A-11D-2153-01	0.6823	-0.022	0.4895
PAAD	TCGA-IB-7890-01A-12D-2200-01	0.7515	-0.3897	-0.3897
PAAD	TCGA-IB-8127-01A-11D-2392-01	0.5523	-0.0357	0.7094
PAAD	TCGA-IB-A7M4-01A-11D-A36N-01	0.5081	-0.0213	0.5399
PAAD	TCGA-LB-A7SX-01A-11D-A33S-01	0.6399	-0.1236	0.4835
PAAD	TCGA-LB-A8F3-01A-11D-A36N-01	0.743	-0.0949	0.6962
PAAD	TCGA-YB-A89D-01A-12D-A36N-01	0.5649	-0.7882	0.9131
PCPG	TCGA-QR-A6GX-01A-11D-A35C-01	0.6069	-0.9534	0.8652
PCPG	TCGA-QR-A6GZ-01A-11D-A35C-01	0.5516	-0.7755	1
PCPG	TCGA-QR-A700-01A-11D-A35C-01	0.5618	-0.362	0.5733
PCPG	TCGA-QT-A69Q-01A-11D-A35C-01	0.566	-0.7961	0.5785
PCPG	TCGA-RW-A681-01A-11D-A35C-01	0.5686	-0.8564	1
PCPG	TCGA-W2-A7H5-01B-11D-A35H-01	0.5142	-0.2947	0.5975
PRAD	TCGA-4L-AA1F-01A-11D-A41J-01	0.5764	-0.0813	0.4111
PRAD	TCGA-FC-A4JI-01A-11D-A256-01	0.6785	-0.508	0.2328
PRAD	TCGA-HC-A9TE-01A-11D-A41J-01	0.5862	-0.0618	0.5103
PRAD	TCGA-V1-A8WV-01A-11D-A376-01	0.6029	-0.2245	-0.1022
PRAD	TCGA-ZG-A9LB-01A-11D-A41J-01	0.5999	-0.3149	0.5065
PRAD	TCGA-ZG-A9N3-01A-11D-A41J-01	0.6667	-0.0972	-0.0972
READ	TCGA-AF-2689-01A-01D-1549-01	0.6959	-0.3132	0.9313
READ	TCGA-AF-2690-01A-02D-1732-01	0.8879	-0.1668	-0.1668
READ	TCGA-AF-2692-01A-01D-0819-01	0.7199	-0.1104	0.3938
READ	TCGA-AF-3400-01A-01D-1549-01	0.7078	-0.2441	-0.2441
READ	TCGA-AF-3911-01A-01D-1732-01	0.7857	-0.348	0.5612
READ	TCGA-AF-6136-01A-11D-1825-01	0.6069	-0.2347	-0.2347
READ	TCGA-AF-A56K-01A-32D-A38W-01	0.7919	-0.7016	0.7464
READ	TCGA-AG-3587-01A-01D-0819-01	0.8607	-0.3434	-0.3434
READ	TCGA-AG-3591-01A-01D-1732-01	0.6091	-0.0434	0.7063
READ	TCGA-AG-3592-01A-02D-1732-01	0.7301	-0.3697	0.6061
READ	TCGA-AG-3600-01A-01D-0824-01	0.7846	-0.1381	-0.1381
READ	TCGA-AG-3601-01A-01D-0824-01	0.7695	-0.0331	0.3869
READ	TCGA-AG-3611-01A-01D-0824-01	0.7999	-0.1115	0.7877
READ	TCGA-AG-3725-01A-11D-1732-01	0.7821	-0.2498	-0.2498
READ	TCGA-AG-3728-01A-01D-0903-01	0.8135	-0.3118	0.4405
READ	TCGA-AG-3881-01A-01D-0903-01	0.5876	-0.2336	0.4997
READ	TCGA-AG-3882-01A-01D-0903-01	0.8003	-0.2224	0.3223
READ	TCGA-AG-3885-01A-01D-0903-01	0.796	-0.5506	0.3104
READ	TCGA-AG-3999-01A-01D-1428-01	0.6723	-0.1289	0.3811
READ	TCGA-AG-4005-01A-01D-1428-01	0.8061	-0.5099	-0.5099
READ	TCGA-AG-4007-01A-01D-1428-01	0.7179	-0.5596	0.8591
READ	TCGA-AG-A014-01A-02D-A003-01	0.9294	-0.3255	-0.3255
READ	TCGA-AG-A01N-01A-01D-A008-01	0.5725	-0.2861	0.7241
READ	TCGA-AG-A026-01A-32D-A080-01	0.8694	-0.2298	-0.2298
READ	TCGA-AG-A02G-01A-01D-A008-01	0.7813	-0.1618	-0.1618
READ	TCGA-AG-A02X-01A-01D-A008-01	0.8542	-0.2841	0.1494
READ	TCGA-AG-A032-01A-01D-A008-01	0.7293	-0.4661	0.4287
READ	TCGA-AH-6544-01A-11D-1825-01	0.6347	-0.3226	-0.3226
READ	TCGA-AH-6643-01A-11D-1825-01	0.7982	-0.4183	0.5186
READ	TCGA-AH-6644-01A-21D-1825-01	0.8304	-0.3172	0.6529
READ	TCGA-AH-6897-01A-11D-1923-01	0.8501	-0.4904	0.6914
READ	TCGA-CI-6621-01A-11D-1825-01	0.5855	-0.2183	0.5657
READ	TCGA-CI-6623-01B-11D-1825-01	0.661	-0.5216	0.4876
READ	TCGA-CL-4957-01A-01D-1732-01	0.7757	-0.1249	0.526
READ	TCGA-DC-6155-01A-11D-1656-01	0.7208	-0.6127	0.7102
READ	TCGA-DC-6156-01A-11D-1656-01	0.8273	-0.305	-0.305
READ	TCGA-DC-6683-01A-11D-1825-01	0.7258	-0.3811	0.3118
READ	TCGA-DY-A1DE-01A-11D-A151-01	0.6851	-0.1337	-0.1337
READ	TCGA-DY-A1DF-01A-11D-A151-01	0.7684	-0.1136	0.7494
READ	TCGA-DY-A1DG-01A-11D-A151-01	0.7227	-0.3239	0.384
READ	TCGA-EI-6512-01A-11D-1732-01	0.8878	-0.0757	0.3353
READ	TCGA-EI-6514-01A-11D-1732-01	0.6392	-0.2909	0.6493
READ	TCGA-EI-6885-01A-11D-1923-01	0.6969	-0.6262	0.6271
READ	TCGA-F5-6810-01A-11D-1825-01	0.7273	-0.0754	0.6767
READ	TCGA-F5-6811-01A-11D-1825-01	0.7022	-0.0752	0.3121
READ	TCGA-G5-6641-01A-11D-1825-01	0.6536	-0.0638	0.2668
SARC	TCGA-3B-A9HI-01A-11D-A386-01	0.5679	-0.3433	0.366
SARC	TCGA-3B-A9HS-01A-11D-A38Y-01	0.6996	-0.0243	0.3317
SARC	TCGA-3B-A9HT-01A-11D-A38Y-01	0.8705	-0.401	0.1069
SARC	TCGA-3B-A9HX-01A-11D-A38Y-01	0.6602	-0.2809	0.8033
SARC	TCGA-3B-A9I1-01A-11D-A38Y-01	0.5155	-0.4765	0.6701
SARC	TCGA-DX-A1KU-01A-32D-A24M-01	0.6306	-0.5021	0.3805
SARC	TCGA-DX-A1KW-01A-22D-A24M-01	0.5939	-0.3134	0.3441
SARC	TCGA-DX-A1KY-01A-11D-A24M-01	0.8282	-0.078	-0.078
SARC	TCGA-DX-A1L1-01A-11D-A24M-01	0.8016	-0.1092	0.4487
SARC	TCGA-DX-A3M2-01A-21D-A227-01	0.6446	-0.0086	0.1144
SARC	TCGA-DX-A3U9-01A-11D-A306-01	0.5764	-0.0213	0.6518
SARC	TCGA-DX-A6YQ-01A-12D-A33D-01	0.7946	-0.0381	0.3206
SARC	TCGA-DX-A6YR-01A-33D-A350-01	0.7647	-0.1309	-0.1309
SARC	TCGA-DX-A6YS-01A-12D-A350-01	0.7902	-0.2301	-0.2301
SARC	TCGA-DX-A6YU-01A-12D-A33D-01	0.6957	-0.0493	0.5455
SARC	TCGA-DX-A6YV-01A-12D-A350-01	0.7101	-0.0544	-0.1583
SARC	TCGA-DX-A6YX-01A-11D-A416-01	0.704	-0.0116	0.4487
SARC	TCGA-DX-A6YZ-01A-12D-A350-01	0.5496	-0.3416	0.2624
SARC	TCGA-DX-A6Z0-01A-13D-A36I-01	0.9371	-0.2248	-0.2248
SARC	TCGA-DX-A7EF-01A-11D-A33D-01	0.7382	-0.1714	0.4874
SARC	TCGA-DX-A7EI-01A-11D-A33D-01	0.6969	-0.353	0.3497
SARC	TCGA-DX-A8BH-01A-11D-A37B-01	0.5667	-0.4447	0.2871
SARC	TCGA-DX-A8BJ-01A-11D-A416-01	0.942	-0.2129	-0.2129
SARC	TCGA-DX-A8BL-01A-11D-A416-01	0.6656	-0.1962	0.2868
SARC	TCGA-DX-AB2E-01A-11D-A38Y-01	0.7876	-0.2465	-0.2465
SARC	TCGA-DX-AB2Q-01A-11D-A38Y-01	0.8187	-0.0595	-0.0129
SARC	TCGA-DX-AB2V-01A-11D-A416-01	0.913	-0.1106	0.7526
SARC	TCGA-DX-AB2W-01A-11D-A38Y-01	0.8077	-0.2388	0.2275
SARC	TCGA-DX-AB30-01A-11D-A38Y-01	0.9731	-0.4308	-0.4308
SARC	TCGA-DX-AB35-01A-21D-A416-01	0.6212	-0.0203	0.5902
SARC	TCGA-HB-A43Z-01A-11D-A24M-01	0.8125	-0.0678	0.6651
SARC	TCGA-HS-A5N8-01A-11D-A26F-01	0.7661	-0.0653	0.0149
SARC	TCGA-HS-A5N9-01A-11D-A26F-01	0.5576	-0.2211	0.4273
SARC	TCGA-IE-A3OV-01A-11D-A227-01	0.6261	-0.0612	0.6214
SARC	TCGA-IE-A4EI-01A-11D-A24M-01	0.7406	-0.1913	0.1752
SARC	TCGA-IE-A4EJ-01A-11D-A24M-01	0.6055	-0.0979	0.1146
SARC	TCGA-IF-A4AJ-01A-11D-A24M-01	0.648	-0.5146	0.7064
SARC	TCGA-IS-A3KA-01A-11D-A21P-01	0.5607	-0.2491	0.2651
SARC	TCGA-JV-A5VF-01A-11D-A29M-01	0.6101	-0.0492	-0.0492
SARC	TCGA-K1-A42W-01A-11D-A24M-01	0.816	-0.0198	0.502
SARC	TCGA-K1-A6RV-01A-11D-A32H-01	0.7031	-0.1707	-0.1707
SARC	TCGA-KD-A5QS-01A-11D-A27O-01	0.5857	-0.1163	0.2786
SARC	TCGA-LI-A9QH-01A-11D-A37B-01	0.8174	-0.29	-0.29
SARC	TCGA-MJ-A68H-01A-11D-A306-01	0.6822	-0.1491	0.1611
SARC	TCGA-N1-A6IA-01A-12D-A32H-01	0.7048	-0.1845	0.0542
SARC	TCGA-PC-A5DL-01A-11D-A26F-01	0.556	-0.1718	0.5109
SARC	TCGA-QQ-A5V9-01A-11D-A32H-01	0.914	-0.2357	0.4434
SARC	TCGA-QQ-A8VB-01A-11D-A37B-01	0.5654	-0.226	-0.226
SARC	TCGA-QQ-A8VF-01A-11D-A37B-01	0.8039	-0.7283	0.6876
SARC	TCGA-SG-A6Z7-01A-12D-A32H-01	0.6537	-0.1929	0.6424
SARC	TCGA-SI-A71O-01A-12D-A33D-01	0.7475	-0.0179	-0.1039
SARC	TCGA-SI-A71Q-01A-12D-A33D-01	0.6796	-0.1146	0.5409
SARC	TCGA-SI-AA8B-01A-11D-A386-01	0.5998	-0.1756	-0.1756
SARC	TCGA-UE-A6QU-01A-12D-A32H-01	0.8124	-0.228	0.2877
SARC	TCGA-WP-A9GB-01A-11D-A37B-01	0.5988	-0.1764	-0.1764
SARC	TCGA-X6-A7W8-01A-21D-A350-01	0.8447	-0.1889	0.3687
SARC	TCGA-X6-A8C2-01A-11D-A36I-01	0.6903	-0.0369	0.569
SARC	TCGA-X6-A8C3-01A-11D-A36I-01	0.7389	-0.2032	-0.2032
SARC	TCGA-X9-A973-01A-11D-A386-01	0.8709	-0.7342	0.6639
SKCM	TCGA-D3-A1Q5-06A-11D-A194-01	0.7708	-0.5426	-0.5426
SKCM	TCGA-D3-A1Q6-06A-11D-A194-01	0.6224	-0.3763	0.1392
SKCM	TCGA-D3-A2JA-06A-11D-A194-01	0.5151	-0.114	0.0355
SKCM	TCGA-D3-A2JC-06A-11D-A192-01	0.6977	-0.3983	0.8721
SKCM	TCGA-D3-A2JE-06A-11D-A371-01	0.7365	-0.6543	0.7399
SKCM	TCGA-D3-A2JF-06A-11D-A194-01	0.6707	-0.4273	0.8192
SKCM	TCGA-D3-A2JP-06A-11D-A192-01	0.68	-0.2697	0.6327
SKCM	TCGA-D3-A3CC-06A-11D-A192-01	0.6023	-0.092	-0.0707
SKCM	TCGA-D3-A3CE-06A-11D-A192-01	0.6418	-0.4782	0.8676
SKCM	TCGA-D3-A3MR-06A-11D-A219-01	0.5185	-0.6088	0.1716
SKCM	TCGA-D3-A3MV-06A-11D-A219-01	0.7858	-0.0083	0.6436
SKCM	TCGA-D3-A51G-06A-11D-A25P-01	0.9027	-0.2901	0.3376
SKCM	TCGA-D3-A8GO-06A-11D-A371-01	0.6476	-0.526	0.7171
SKCM	TCGA-D3-A8GP-06A-11D-A371-01	0.6246	-0.2906	0.4752
SKCM	TCGA-D9-A6E9-06A-12D-A30W-01	0.6978	-0.3162	0.5757
SKCM	TCGA-D9-A6EC-06A-11D-A30W-01	0.6057	-0.0204	0.6307
SKCM	TCGA-DA-A1HV-06A-21D-A194-01	0.8427	-0.2223	-0.2223
SKCM	TCGA-DA-A1I1-06A-12D-A194-01	0.7376	-0.4891	0.7144
SKCM	TCGA-DA-A1I2-06A-21D-A192-01	0.6099	-0.6212	0.2702
SKCM	TCGA-DA-A1I7-06A-22D-A191-01	0.7697	-0.2668	0.5032
SKCM	TCGA-DA-A1I8-06A-11D-A191-01	0.8527	-0.3596	1
SKCM	TCGA-DA-A1IA-06A-11D-A194-01	0.6911	-0.6788	0.5152
SKCM	TCGA-DA-A95V-06A-11D-A371-01	0.7929	-0.0717	-0.0717
SKCM	TCGA-EB-A5SH-06A-11D-A30W-01	0.7466	-0.3622	0.3111
SKCM	TCGA-EB-A5UL-06A-11D-A30W-01	0.7169	-0.1155	0.1116
SKCM	TCGA-EE-A17Y-06A-11D-A194-01	0.6169	-0.3852	0.5703
SKCM	TCGA-EE-A180-06A-11D-A219-01	0.5648	-0.192	0.6959
SKCM	TCGA-EE-A181-06A-11D-A194-01	0.7456	-0.1594	-0.1594
SKCM	TCGA-EE-A20H-06A-11D-A191-01	0.6479	-0.0558	0.727
SKCM	TCGA-EE-A29D-06A-11D-A191-01	0.7456	-0.2594	-0.2594
SKCM	TCGA-EE-A29G-06A-12D-A194-01	0.5657	-0.7538	-0.7538
SKCM	TCGA-EE-A29L-06A-12D-A194-01	0.6661	-0.3912	-0.3912
SKCM	TCGA-EE-A29T-06A-11D-A191-01	0.6935	-0.2482	0.6268
SKCM	TCGA-EE-A2A5-06A-11D-A191-01	0.8584	-0.3294	-0.3294
SKCM	TCGA-EE-A2GB-06A-11D-A191-01	0.6888	-0.2365	0.7182
SKCM	TCGA-EE-A2GI-06A-11D-A194-01	0.5738	-0.5384	0.6256
SKCM	TCGA-EE-A2GM-06B-11D-A194-01	0.54	-0.2129	0.5667
SKCM	TCGA-EE-A2GO-06A-11D-A194-01	0.6736	-0.6841	0.7148
SKCM	TCGA-EE-A2GP-06A-11D-A191-01	0.6626	-0.2335	0.8905
SKCM	TCGA-EE-A2M6-06A-12D-A191-01	0.7604	-0.1224	0.8598
SKCM	TCGA-EE-A2M7-06A-11D-A191-01	0.7054	-0.5995	0.5344
SKCM	TCGA-EE-A2MK-06A-11D-A194-01	0.9499	-0.2304	-0.2304
SKCM	TCGA-EE-A2MS-06A-11D-A191-01	0.754	-0.4046	0.5991
SKCM	TCGA-EE-A3AA-06A-11D-A194-01	0.5724	-0.1273	0.4797
SKCM	TCGA-EE-A3AE-06A-11D-A194-01	0.8277	-0.2288	0.4137
SKCM	TCGA-EE-A3JB-06A-11D-A219-01	0.6829	-0.1823	0.8134
SKCM	TCGA-EE-A3JI-06A-11D-A219-01	0.6099	-0.0856	0.7447
SKCM	TCGA-ER-A19B-06A-11D-A194-01	0.7107	-0.2679	0.682
SKCM	TCGA-ER-A19D-06A-11D-A191-01	0.792	-0.0097	-0.0097
SKCM	TCGA-ER-A19G-06A-11D-A194-01	0.6629	-0.6712	0.6397
SKCM	TCGA-ER-A19P-06A-11D-A194-01	0.6293	-0.3203	0.6834
SKCM	TCGA-ER-A19T-06A-11D-A192-01	0.677	-0.08	-0.08
SKCM	TCGA-ER-A2ND-06A-11D-A194-01	0.6969	-0.5396	-0.5396
SKCM	TCGA-ER-A3PL-06A-11D-A238-01	0.7062	-0.0985	0.4701
SKCM	TCGA-FR-A3YN-06A-11D-A238-01	0.8849	-0.3287	-0.3287
SKCM	TCGA-FR-A3YO-06A-11D-A238-01	0.6591	-0.037	0.5556
SKCM	TCGA-FR-A69P-06A-21D-A30W-01	0.7968	-0.3635	-0.3635
SKCM	TCGA-FR-A8YC-06A-11D-A371-01	0.7986	-0.4504	0.4917
SKCM	TCGA-FS-A1ZC-06A-11D-A191-01	0.7825	-0.4778	0.7886
SKCM	TCGA-FS-A1ZD-06A-11D-A191-01	0.6479	-0.6248	0.5597
SKCM	TCGA-FS-A1ZU-06A-12D-A194-01	0.7699	-0.3346	0.5373
SKCM	TCGA-FS-A1ZY-06A-11D-A191-01	0.6075	-0.0126	0.4246
SKCM	TCGA-FS-A4F2-06A-11D-A24Q-01	0.6542	-0.3702	0.7737
SKCM	TCGA-FS-A4F5-06A-11D-A25P-01	0.5592	-0.4582	0.5688
SKCM	TCGA-FW-A3I3-06A-11D-A219-01	0.7109	-0.2096	-0.2096
SKCM	TCGA-GF-A4EO-06A-12D-A24Q-01	0.6434	-0.0116	0.5777
SKCM	TCGA-GN-A264-06A-11D-A194-01	0.7469	-0.2828	-0.2828
SKCM	TCGA-GN-A266-06A-11D-A191-01	0.549	-0.5265	0.3493
SKCM	TCGA-GN-A26A-06A-11D-A192-01	0.7677	-0.3003	0.3189
SKCM	TCGA-GN-A9SD-06A-11D-A400-01	0.5703	-0.5882	0.7455
SKCM	TCGA-QB-AA9O-06A-11D-A396-01	0.763	-0.1782	0.3334
SKCM	TCGA-W3-A825-06A-11D-A34T-01	0.6691	-0.1051	0.5731
SKCM	TCGA-W3-AA1V-06B-11D-A400-01	0.7045	-0.4307	0.6986
SKCM	TCGA-WE-A8K6-06A-11D-A371-01	0.576	-0.6129	0.6979
SKCM	TCGA-WE-A8ZX-06A-11D-A371-01	0.6541	-0.0894	0.9671
SKCM	TCGA-WE-A8ZY-06A-11D-A371-01	0.6889	-0.2361	-0.2361
SKCM	TCGA-WE-AAA3-06A-11D-A38F-01	0.6541	-0.507	0.8477
SKCM	TCGA-YD-A9TA-06A-11D-A396-01	0.7174	-0.2457	-0.2457
STAD	TCGA-B7-A5TN-01A-21D-A31K-01	0.8308	-0.0971	-0.0971
STAD	TCGA-BR-4183-01A-02D-1130-01	0.6651	-0.2065	0.5101
STAD	TCGA-BR-4367-01A-01D-1155-01	0.8551	-0.0391	-0.0391
STAD	TCGA-BR-6454-01A-11D-1799-01	0.6657	-0.0761	-0.0761
STAD	TCGA-BR-6801-01A-11D-1881-01	0.903	-0.8135	1
STAD	TCGA-BR-7716-01A-21D-2052-01	0.8868	-0.0346	0.1295
STAD	TCGA-BR-8286-01A-12D-2338-01	0.77	-0.3823	0.3158
STAD	TCGA-BR-8295-01A-11D-2338-01	0.7996	-0.3331	-0.3331
STAD	TCGA-BR-8296-01A-11D-2338-01	0.7002	-0.3009	-0.0088
STAD	TCGA-BR-8369-01A-11D-2338-01	0.6361	-0.069	0.0985
STAD	TCGA-BR-8373-01A-11D-2338-01	0.803	-0.2851	0.6868
STAD	TCGA-BR-8484-01A-11D-2390-01	0.705	-0.0812	0.4729
STAD	TCGA-BR-8679-01A-11D-2390-01	0.8926	-0.3731	0.4651
STAD	TCGA-BR-8687-01A-11D-2390-01	0.7199	-0.145	-0.145
STAD	TCGA-BR-A4CQ-01A-12D-A253-01	0.676	-0.2113	0.3788
STAD	TCGA-BR-A4CR-01A-11D-A24C-01	0.8486	-0.2693	0.935
STAD	TCGA-BR-A4J1-01A-11D-A253-01	0.7429	-0.2139	-0.0417
STAD	TCGA-BR-A4PE-01A-31D-A253-01	0.7197	-0.4195	0.347
STAD	TCGA-BR-A4PF-01A-11D-A253-01	0.6783	-0.1744	0.0632
STAD	TCGA-BR-A4QI-01A-12D-A253-01	0.799	-0.0051	0.136
STAD	TCGA-CD-5800-01A-11D-1599-01	0.7615	-0.3536	-0.3536
STAD	TCGA-CD-5801-01A-11D-1599-01	0.8441	-0.259	-0.259
STAD	TCGA-CD-8527-01A-11D-2338-01	0.7587	-0.1711	0.0936
STAD	TCGA-CD-8528-01A-11D-2338-01	0.7053	-0.4655	0.379
STAD	TCGA-CD-8535-01A-11D-2338-01	0.7711	-0.3464	0.3422
STAD	TCGA-CG-4438-01A-01D-1155-01	0.7554	-0.3325	-0.3325
STAD	TCGA-CG-4440-01A-01D-1155-01	0.8366	-0.153	0.5259
STAD	TCGA-CG-4444-01A-01D-1155-01	0.8351	-0.1257	-0.1257
STAD	TCGA-CG-4455-01A-01D-1155-01	0.641	-0.2364	-0.2364
STAD	TCGA-CG-4460-01A-01D-1155-01	0.6849	-0.4821	0.7187
STAD	TCGA-CG-4475-01A-01D-1155-01	0.8436	-0.1644	0.1984
STAD	TCGA-CG-5724-01A-11D-1599-01	0.7821	-0.3543	-0.3543
STAD	TCGA-CG-5727-01A-11D-1599-01	0.8473	-0.2492	0.5463
STAD	TCGA-CG-5730-01A-11D-1599-01	0.7295	-0.275	0.3599
STAD	TCGA-CG-5734-01A-11D-1599-01	0.5741	-0.0929	-0.0929
STAD	TCGA-D7-5579-01A-01D-1599-01	0.5821	-0.1342	0.3946
STAD	TCGA-D7-6527-01A-11D-1799-01	0.6586	-0.3548	0.5275
STAD	TCGA-D7-6820-01A-11D-1881-01	0.7057	-0.1187	0.428
STAD	TCGA-D7-8573-01A-11D-2338-01	0.7436	-0.7353	-0.7353
STAD	TCGA-D7-A6EV-01A-11D-A31K-01	0.7329	-0.0748	0.1191
STAD	TCGA-D7-A6EX-01A-11D-A31K-01	0.5613	-0.2448	0.4382
STAD	TCGA-D7-A74A-01A-11D-A32M-01	0.7686	-0.3047	0.4517
STAD	TCGA-EQ-5647-01A-01D-1599-01	0.6586	-0.255	0.6157
STAD	TCGA-FP-7735-01A-11D-2052-01	0.7053	-0.612	0.558
STAD	TCGA-FP-7916-01A-11D-2200-01	0.6971	-0.4389	0.5471
STAD	TCGA-FP-7998-01A-11D-2200-01	0.6313	-0.1258	0.4435
STAD	TCGA-FP-8631-01A-11D-2390-01	0.5912	-0.1956	0.3457
STAD	TCGA-FP-A8CX-01A-11D-A363-01	0.7367	-0.0193	-0.0193
STAD	TCGA-FP-A9TM-01A-11D-A396-01	0.6713	-0.3654	-0.3654
STAD	TCGA-HF-7131-01A-11D-2052-01	0.6776	-0.0406	0.6868
STAD	TCGA-HU-8243-01A-11D-2338-01	0.6648	-0.4306	0.1546
STAD	TCGA-HU-8249-01A-11D-2338-01	0.6701	-0.2056	0.2986
STAD	TCGA-HU-A4G6-01A-11D-A24C-01	0.7386	-0.7272	0.9107
STAD	TCGA-HU-A4GD-01A-11D-A253-01	0.8309	-0.0246	0.0357
STAD	TCGA-HU-A4H5-01A-21D-A253-01	0.7635	-0.3354	0.2842
STAD	TCGA-HU-A4HD-01A-11D-A253-01	0.7079	-0.2287	0.4269
STAD	TCGA-IN-8663-01A-11D-2390-01	0.7342	-0.4108	0.7935
STAD	TCGA-IN-A6RI-01A-11D-A32M-01	0.6218	-0.077	0.4648
STAD	TCGA-IN-A6RO-01A-12D-A33S-01	0.565	-0.2972	0.5131
STAD	TCGA-IN-A7NT-01A-21D-A34T-01	0.6412	-0.5131	0.7197
STAD	TCGA-IN-A7NU-01A-22D-A34T-01	0.6704	-0.2912	0.8421
STAD	TCGA-MX-A663-01A-11D-A31K-01	0.5944	-0.0542	0.3829
STAD	TCGA-MX-A666-01A-11D-A31K-01	0.698	-0.0298	-0.0298
STAD	TCGA-R5-A7O7-01A-11D-A33S-01	0.6788	-0.1876	0.2496
STAD	TCGA-R5-A7ZE-01B-11D-A34T-01	0.6263	-0.2004	0.1843
STAD	TCGA-RD-A7C1-01A-11D-A32M-01	0.835	-0.2574	-0.2574
STAD	TCGA-RD-A8N1-01A-12D-A363-01	0.7485	-0.0504	0.17
STAD	TCGA-SW-A7EB-01A-11D-A34T-01	0.6897	-0.1921	0.5032
STAD	TCGA-VQ-A8PX-01A-12D-A40Z-01	0.7891	-0.2436	0.5249
STAD	TCGA-VQ-A8PY-01A-11D-A40Z-01	0.847	-0.0541	-0.0541
STAD	TCGA-VQ-A91A-01A-11D-A40Z-01	0.8286	-0.2102	0.5388
STAD	TCGA-VQ-A91N-01A-11D-A40Z-01	0.9238	-0.1711	-0.1711
STAD	TCGA-VQ-A91U-01A-11D-A40Z-01	0.7663	-0.1982	0.2642
STAD	TCGA-VQ-A91Z-01A-11D-A40Z-01	0.6181	-0.234	0.1884
STAD	TCGA-VQ-A922-01A-11D-A40Z-01	0.8202	-0.0686	-0.0686
STAD	TCGA-VQ-A925-01A-11D-A40Z-01	0.7399	-0.1569	-0.1569
STAD	TCGA-VQ-A94U-01A-12D-A40Z-01	0.687	-0.0316	-0.0316
STAD	TCGA-VQ-AA68-01A-11D-A40Z-01	0.8106	-0.0031	-0.0136
STAD	TCGA-VQ-AA6I-01A-11D-A40Z-01	0.6771	-0.2498	0.325
STAD	TCGA-VQ-AA6K-01A-11D-A40Z-01	0.661	-0.0035	0.5346
TGCT	TCGA-2G-AAEX-01A-11D-A42X-01	0.6973	-0.1393	0.5112
TGCT	TCGA-2G-AAF1-01A-11D-A42X-01	0.639	-0.7786	0.5285
TGCT	TCGA-2G-AAF4-01A-11D-A42X-01	0.5276	-0.037	0.3919
TGCT	TCGA-2G-AAF6-01A-11D-A42X-01	0.5114	-0.724	0.5874
TGCT	TCGA-2G-AAFG-01A-11D-A42X-01	0.6135	-0.5484	0.4229
TGCT	TCGA-2G-AAFH-01A-12D-A42X-01	0.5776	-0.0574	-0.0574
TGCT	TCGA-2G-AAFJ-01A-11D-A42X-01	0.7069	-0.4317	0.5536
TGCT	TCGA-2G-AAFN-01A-31D-A42X-01	0.7106	-0.543	0.5651
TGCT	TCGA-2G-AAFO-01A-31D-A42X-01	0.5026	-0.2044	0.196
TGCT	TCGA-2G-AAG0-01A-11D-A42X-01	0.6316	-0.0714	0.1416
TGCT	TCGA-2G-AAG6-01A-11D-A42X-01	0.7754	-0.1272	0.3106
TGCT	TCGA-2G-AAG7-01A-11D-A42X-01	0.683	-0.6007	0.3124
TGCT	TCGA-2G-AAG9-01A-11D-A42X-01	0.6681	-0.1163	0.3616
TGCT	TCGA-2G-AAGA-01A-11D-A42X-01	0.7447	-0.123	-0.123
TGCT	TCGA-2G-AAGC-01A-21D-A42X-01	0.8525	-0.0762	-0.0762
TGCT	TCGA-2G-AAGE-01A-21D-A42X-01	0.7846	-0.221	0.3344
TGCT	TCGA-2G-AAGF-01A-31D-A42X-01	0.8168	-0.1005	0.4066
TGCT	TCGA-2G-AAGG-01A-11D-A42X-01	0.8445	-0.1495	0.1686
TGCT	TCGA-2G-AAGJ-01A-11D-A42X-01	0.6299	-0.5018	0.406
TGCT	TCGA-2G-AAGK-01A-11D-A42X-01	0.512	-0.4581	0.8028
TGCT	TCGA-2G-AAGN-01A-11D-A42X-01	0.5998	-0.4322	0.1593
TGCT	TCGA-2G-AAGO-01A-11D-A42X-01	0.8062	-0.4845	-0.4845
TGCT	TCGA-2G-AAGP-01A-11D-A42X-01	0.7551	-0.0753	0.6442
TGCT	TCGA-2G-AAGS-01A-11D-A42X-01	0.7835	-0.5032	0.6989
TGCT	TCGA-2G-AAGV-01A-11D-A42X-01	0.7815	-0.4855	-0.4855
TGCT	TCGA-2G-AAGW-01A-11D-A42X-01	0.8263	-0.2383	0.4892
TGCT	TCGA-2G-AAGX-01A-11D-A42X-01	0.7701	-0.6636	-0.6636
TGCT	TCGA-2G-AAGY-01A-11D-A42X-01	0.6242	-0.5564	-0.5564
TGCT	TCGA-2G-AAGZ-01A-11D-A42X-01	0.5641	-0.3117	0.5169
TGCT	TCGA-2G-AAH0-01A-11D-A42X-01	0.7483	-0.2242	-0.2242
TGCT	TCGA-2G-AAH2-01A-11D-A42X-01	0.7145	-0.0627	0.4587
TGCT	TCGA-2G-AAH3-01A-11D-A42X-01	0.6206	-0.6985	0.3301
TGCT	TCGA-2G-AAH4-01A-12D-A42X-01	0.6953	-0.4246	0.3067
TGCT	TCGA-2G-AAH8-01A-11D-A42X-01	0.7346	-0.1015	0.4162
TGCT	TCGA-2G-AAHA-01A-11D-A42X-01	0.7677	-0.31	0.8612
TGCT	TCGA-2G-AAHG-01A-11D-A42X-01	0.7175	-0.3957	0.251
TGCT	TCGA-2G-AAHL-01A-11D-A42X-01	0.554	-0.8068	0.6706
TGCT	TCGA-2G-AAHN-01A-11D-A42X-01	0.6861	-0.6416	0.2234
TGCT	TCGA-2G-AAHP-01A-12D-A42X-01	0.5795	-0.4188	0.2717
TGCT	TCGA-2G-AAHT-01A-11D-A42X-01	0.6097	-0.5243	0.3389
TGCT	TCGA-2G-AAKD-01A-31D-A42X-01	0.6863	-0.1894	0.2304
TGCT	TCGA-2G-AAKG-01A-11D-A42X-01	0.623	-0.4875	0.4031
TGCT	TCGA-2G-AAKL-01A-11D-A42X-01	0.7297	-0.1461	-0.1461
TGCT	TCGA-2G-AAKM-01A-11D-A42X-01	0.8151	-0.2925	0.8608
TGCT	TCGA-2G-AAL5-01A-11D-A42X-01	0.625	-0.7207	0.9213
TGCT	TCGA-2G-AAL7-01A-11D-A42X-01	0.6115	-0.3231	0.3018
TGCT	TCGA-2G-AALF-01A-11D-A42X-01	0.7487	-0.3853	-0.3853
TGCT	TCGA-2G-AALN-01A-11D-A42X-01	0.8153	-0.2245	0.272
TGCT	TCGA-2G-AALP-01A-12D-A42X-01	0.5427	-0.7246	0.5424
TGCT	TCGA-2G-AALQ-01A-12D-A42X-01	0.6435	-0.7543	0.7372
TGCT	TCGA-2G-AALS-01A-12D-A42X-01	0.6575	-0.4638	0.4051
TGCT	TCGA-2G-AALT-01A-11D-A42X-01	0.7857	-0.5251	0.2495
TGCT	TCGA-2G-AALW-01A-11D-A42X-01	0.686	-0.1958	0.7502
TGCT	TCGA-2G-AALY-01A-11D-A42X-01	0.7462	-0.5028	0.2979
TGCT	TCGA-2G-AALZ-01A-11D-A42X-01	0.7816	-0.4505	0.697
TGCT	TCGA-2G-AAM2-01A-11D-A434-01	0.671	-0.6377	0.6504
TGCT	TCGA-2G-AAM3-01A-11D-A434-01	0.6584	-0.7815	0.6825
TGCT	TCGA-2X-A9D5-01A-11D-A434-01	0.6153	-0.1621	0.2373
TGCT	TCGA-2X-A9D6-01A-11D-A434-01	0.8507	-0.157	0.6363
TGCT	TCGA-4K-AA1G-01A-11D-A434-01	0.7002	-0.3026	-0.3026
TGCT	TCGA-4K-AA1I-01A-11D-A434-01	0.5843	-0.5062	-0.5062
TGCT	TCGA-S6-A8JX-01A-11D-A434-01	0.6156	-0.5163	0.5407
TGCT	TCGA-SB-A76C-01A-11D-A434-01	0.7695	-0.4248	-0.4248
TGCT	TCGA-SN-A84W-01A-11D-A434-01	0.6588	-0.7707	0.8206
TGCT	TCGA-SN-A84Y-01A-11D-A434-01	0.7064	-0.1243	-0.1243
TGCT	TCGA-SO-A8JP-01A-11D-A434-01	0.7578	-0.029	-0.029
TGCT	TCGA-VF-A8A9-01A-11D-A434-01	0.67	-0.6441	0.2034
TGCT	TCGA-VF-A8AB-01A-31D-A434-01	0.7469	-0.6999	-0.6999
TGCT	TCGA-W4-A7U2-01A-11D-A434-01	0.6949	-0.4908	0.4802
TGCT	TCGA-W4-A7U3-01A-12D-A434-01	0.7276	-0.6993	0.8453
TGCT	TCGA-W4-A7U4-01A-12D-A434-01	0.7818	-0.3935	0.5995
TGCT	TCGA-WZ-A7V3-01A-11D-A434-01	0.6916	-0.464	0.4806
TGCT	TCGA-WZ-A7V4-01A-11D-A434-01	0.6509	-0.4282	0.3119
TGCT	TCGA-XE-A8H1-01A-11D-A434-01	0.5666	-0.2091	0.6721
TGCT	TCGA-XE-A8H4-01A-31D-A434-01	0.5987	-0.5064	-0.5064
TGCT	TCGA-XE-A8H5-01A-11D-A434-01	0.6726	-0.0592	-0.0592
TGCT	TCGA-XE-A9SE-01A-21D-A434-01	0.5198	-0.4196	-0.4196
TGCT	TCGA-XE-AANI-01A-11D-A434-01	0.8088	-0.4249	0.3147
TGCT	TCGA-XE-AANR-01A-11D-A434-01	0.7149	-0.486	-0.486
TGCT	TCGA-XE-AANV-01A-11D-A434-01	0.7973	-0.4844	0.2362
TGCT	TCGA-XE-AAO4-01A-11D-A434-01	0.5828	-0.2685	0.2175
TGCT	TCGA-XE-AAO6-01A-31D-A434-01	0.5573	-0.1809	0.0322
TGCT	TCGA-XE-AAOB-01A-11D-A434-01	0.7533	-0.6824	0.3592
TGCT	TCGA-XE-AAOD-01A-11D-A434-01	0.5363	-0.2222	0.1078
TGCT	TCGA-XE-AAOF-01A-11D-A434-01	0.6109	-0.7792	0.4887
TGCT	TCGA-XE-AAOJ-01A-12D-A434-01	0.7611	-0.5498	0.6626
TGCT	TCGA-XY-A8S3-01B-11D-A434-01	0.755	-0.4383	0.6448
TGCT	TCGA-XY-A9T9-01A-11D-A434-01	0.7256	-0.3663	0.2851
TGCT	TCGA-YU-A90Q-01A-11D-A434-01	0.7307	-0.3719	0.6601
TGCT	TCGA-YU-A912-01A-11D-A434-01	0.6073	-0.3348	0.3385
TGCT	TCGA-YU-A94I-01A-11D-A434-01	0.7813	-0.1104	0.4589
TGCT	TCGA-YU-AA4L-01A-11D-A434-01	0.7241	-0.5606	0.8127
TGCT	TCGA-YU-AA61-01A-11D-A434-01	0.6677	-0.4723	0.757
TGCT	TCGA-ZM-AA05-01A-12D-A434-01	0.5924	-0.5556	0.4586
TGCT	TCGA-ZM-AA0B-01A-11D-A434-01	0.6304	-0.4046	0.5655
TGCT	TCGA-ZM-AA0H-01A-11D-A434-01	0.7338	-0.4482	0.3481
TGCT	TCGA-ZM-AA0N-01A-21D-A434-01	0.7251	-0.242	-0.242
THCA	TCGA-BJ-A190-01A-11D-A13V-01	0.8131	-0.402	0.9559
THCA	TCGA-EL-A4KI-01A-11D-A256-01	0.7182	-0.7146	0.5587
THCA	TCGA-EM-A2CO-01A-11D-A19I-01	0.5611	-0.8097	0.9712
THCA	TCGA-EM-A2OY-01A-11D-A201-01	0.5832	-0.8431	0.6917
THCA	TCGA-EM-A3O9-01A-11D-A21Y-01	0.5575	-1	0.762
THCA	TCGA-FY-A3I5-01B-11D-A21Y-01	0.5051	-0.113	0.7801
THYM	TCGA-3S-A8YW-01A-11D-A422-01	0.6414	-0.5923	0.7983
THYM	TCGA-4V-A9QR-01A-11D-A422-01	0.782	-0.3717	0.4189
THYM	TCGA-4X-A9FD-01A-11D-A422-01	0.5207	-0.9999	0.4762
THYM	TCGA-5U-AB0E-01A-11D-A422-01	0.8272	-0.5058	0.8344
THYM	TCGA-X7-A8M3-01A-11D-A422-01	0.8288	-0.6373	0.7036
THYM	TCGA-XU-A930-01A-11D-A422-01	0.5731	-0.4189	0.2251
THYM	TCGA-XU-A936-01A-11D-A427-01	0.7401	-0.0238	0.3623
THYM	TCGA-ZB-A96F-01A-11D-A427-01	0.6754	-0.437	0.1983
UCEC	TCGA-A5-A0GN-01A-11D-A042-01	0.5675	-0.7077	0.8226
UCEC	TCGA-A5-A1OG-01A-11D-A14F-01	0.6345	-0.0803	0.3694
UCEC	TCGA-AJ-A23M-01A-11D-A160-01	0.667	-0.135	0.6244
UCEC	TCGA-AJ-A23N-01A-11D-A227-01	0.6197	-0.3652	0.2712
UCEC	TCGA-AJ-A3BI-01A-11D-A20R-01	0.7687	-0.079	0.7636
UCEC	TCGA-AJ-A3EJ-01A-11D-A19X-01	0.5972	-0.5766	0.4903
UCEC	TCGA-AJ-A3EM-01A-11D-A20R-01	0.7387	-0.0357	-0.0357
UCEC	TCGA-AJ-A3IA-01A-11D-A20R-01	0.6828	-0.0108	0.1065
UCEC	TCGA-AJ-A3NH-01A-11D-A227-01	0.6214	-0.1618	0.6203
UCEC	TCGA-AP-A05H-01A-11D-A00X-01	0.6098	-0.313	0.4061
UCEC	TCGA-AP-A1DQ-01A-11D-A134-01	0.6568	-0.0888	0.6836
UCEC	TCGA-AP-A5FX-01A-11D-A27O-01	0.5984	-0.0538	0.3143
UCEC	TCGA-AX-A1CA-01A-12D-A134-01	0.6656	-0.2356	-0.1088
UCEC	TCGA-AX-A2H2-01A-11D-A17U-01	0.7026	-0.372	0.5021
UCEC	TCGA-AX-A2H4-01A-21D-A18N-01	0.8021	-0.197	-0.197
UCEC	TCGA-AX-A3FV-01A-11D-A227-01	0.8303	-0.1547	-0.1547
UCEC	TCGA-B5-A0JN-01A-11D-A102-01	0.7994	-0.2259	0.6614
UCEC	TCGA-B5-A11I-01A-11D-A10L-01	0.5793	-0.3411	0.5745
UCEC	TCGA-B5-A11P-01B-11D-A14F-01	0.5803	-0.9189	0.9189
UCEC	TCGA-B5-A1MY-01A-11D-A141-01	0.6637	-0.0748	-0.0748
UCEC	TCGA-B5-A1N2-01A-21D-A141-01	0.7375	-0.1747	0.3578
UCEC	TCGA-B5-A3F9-01A-21D-A227-01	0.7542	-0.5747	0.2701
UCEC	TCGA-B5-A3S1-01A-11D-A227-01	0.6387	-0.3153	0.1382
UCEC	TCGA-B5-A5OD-01A-11D-A31T-01	0.6931	-0.066	-0.066
UCEC	TCGA-BG-A0M6-01A-31D-A102-01	0.682	-0.0111	0.6815
UCEC	TCGA-BK-A4ZD-01A-11D-A27O-01	0.8906	-0.0903	0.3469
UCEC	TCGA-BS-A0TE-01A-11D-A102-01	0.8359	-0.7768	0.8726
UCEC	TCGA-BS-A0V8-01A-11D-A120-01	0.7102	-0.2222	0.5674
UCEC	TCGA-D1-A3JQ-01A-11D-A227-01	0.5641	-0.0023	0.7423
UCEC	TCGA-DF-A2L0-01A-11D-A17U-01	0.7533	-0.3132	0.3881
UCEC	TCGA-DI-A1NO-01A-31D-A160-01	0.8527	-0.0231	0.5638
UCEC	TCGA-DI-A2QT-01A-12D-A19X-01	0.7852	-0.0778	0.2266
UCEC	TCGA-DI-A2QY-01A-12D-A19X-01	0.7635	-0.213	-0.213
UCEC	TCGA-E6-A1LZ-01A-11D-A141-01	0.7983	-0.2231	-0.2231
UCEC	TCGA-E6-A8L9-01A-21D-A37M-01	0.6137	-0.2985	0.5708
UCEC	TCGA-EO-A3B1-01A-12D-A19X-01	0.6293	-0.141	0.5286
UCEC	TCGA-EY-A1GC-01A-11D-A13J-01	0.7114	-0.117	0.7202
UCEC	TCGA-EY-A1GS-01A-11D-A13J-01	0.8158	-0.1285	0.463
UCEC	TCGA-EY-A1GW-01A-22D-A13J-01	0.632	-0.1609	0.6951
UCEC	TCGA-EY-A2ON-01A-21D-A18N-01	0.6671	-0.4347	-0.4347
UCEC	TCGA-EY-A2OO-01A-11D-A19X-01	0.6194	-0.6893	1
UCEC	TCGA-FI-A2EW-01A-11D-A17C-01	0.69	-0.0859	0.2332
UCEC	TCGA-FI-A2EY-01A-12D-A18N-01	0.7882	-0.1278	-0.1278
UCEC	TCGA-KP-A3W3-01A-11D-A227-01	0.6563	-0.4353	0.5958
UCEC	TCGA-PG-A914-01A-11D-A37M-01	0.6419	-0.1642	-0.1642
UCS	TCGA-N5-A4RA-01A-11D-A28Q-01	0.7536	-0.034	-0.0573
UCS	TCGA-N5-A4RJ-01A-11D-A28Q-01	0.5941	-0.3268	0.3187
UCS	TCGA-N5-A4RN-01A-12D-A28Q-01	0.7659	-0.1461	-0.1461
UCS	TCGA-N5-A4RO-01A-11D-A28Q-01	0.7219	-0.4679	0.3304
UCS	TCGA-N5-A4RT-01A-11D-A28Q-01	0.7094	-0.1855	-0.1855
UCS	TCGA-N5-A4RU-01A-31D-A28Q-01	0.7422	-0.2014	0.367
UCS	TCGA-N6-A4VC-01A-11D-A28Q-01	0.717	-0.2001	0.6779
UCS	TCGA-N6-A4VG-01A-31D-A28Q-01	0.7038	-0.2565	0.4949
UCS	TCGA-N7-A59B-01A-11D-A28Q-01	0.5599	-0.6247	0.7715
UCS	TCGA-N8-A4PL-01A-11D-A28Q-01	0.579	-0.4734	0.5735
UCS	TCGA-N8-A4PN-01A-11D-A28Q-01	0.7459	-0.4363	0.4814
UCS	TCGA-N8-A4PO-01A-11D-A28Q-01	0.5794	-0.2361	0.2731
UCS	TCGA-N8-A4PP-01A-11D-A28Q-01	0.6708	-0.3204	-0.3204
UCS	TCGA-N9-A4Q1-01A-11D-A28Q-01	0.6702	-0.344	0.4445
UCS	TCGA-N9-A4Q3-01A-11D-A28Q-01	0.7584	-0.0959	0.4601
UCS	TCGA-N9-A4Q4-01A-11D-A28Q-01	0.6383	-0.1461	0.4467
UCS	TCGA-N9-A4Q8-01A-31D-A28Q-01	0.826	-0.1286	0.1189
UCS	TCGA-NA-A4QV-01A-11D-A28Q-01	0.6687	-0.2052	0.3987
UCS	TCGA-NF-A4X2-01A-11D-A28Q-01	0.673	-0.0484	0.326
UCS	TCGA-NG-A4VU-01A-11D-A28Q-01	0.6208	-0.0205	-0.0205
UVM	TCGA-V4-A9EO-01A-12D-A39V-01	0.5406	-0.8104	0.9189
UVM	TCGA-VD-A8KL-01A-11D-A39V-01	0.6312	-0.7131	0.4038
UVM	TCGA-VD-AA8O-01A-11D-A39V-01	0.6364	-0.3467	0.6878
UVM	TCGA-YZ-A982-01A-11D-A39V-01	0.565	-0.9508	0.6194
UVM	TCGA-YZ-A984-01A-11D-A39V-01	0.5684	-0.8684	1
